# Supplementary material for: A systematic review of qualitative research on the contributory factors leading to medicine-related problems from the perspectives of adult patients with cardiovascular diseases and diabetes mellitus
Source: PubMed Central journal article supplement — BMJ Open. 2014 Sep 19;4(9):e005992. doi: 10.1136/bmjopen-2014-005992 (PMC4170202; doi:10.1136/bmjopen-2014-005992), 2014-09-19
Supplement: bmjopen-2014-005992.draft_revisions.pdf [file bmjopen-2014-005992.draft_revisions.pdf]

# BMJ Open

**A systematic review of qualitative research on the contributory factors leading to medicine-related problems from the perspectives of adult patients with cardiovascular diseases and diabetes mellitus**

|                                 |                                                                                                                                                                                                                                                                            |
|---------------------------------|----------------------------------------------------------------------------------------------------------------------------------------------------------------------------------------------------------------------------------------------------------------------------|
| Journal:                        | <i>BMJ Open</i>                                                                                                                                                                                                                                                            |
| Manuscript ID:                  | bmjopen-2014-005992                                                                                                                                                                                                                                                        |
| Article Type:                   | Research                                                                                                                                                                                                                                                                   |
| Date Submitted by the Author:   | 27-Jun-2014                                                                                                                                                                                                                                                                |
| Complete List of Authors:       | Al Hamid, Abdullah; University of Hertfordshire, Pharmacy<br>Ghaleb, Maisoon; University of Hertfordshire, Pharmacy<br>Aljadhey, Hisham; King Saud University, Clinical Pharmacy Department, College of Pharmacy,<br>Aslanpour, Zoe; University of Hertfordshire, Pharmacy |
| <b>Primary Subject Heading</b>: | Qualitative research                                                                                                                                                                                                                                                       |
| Secondary Subject Heading:      | Cardiovascular medicine, Diabetes and endocrinology                                                                                                                                                                                                                        |
| Keywords:                       | QUALITATIVE RESEARCH, DIABETES & ENDOCRINOLOGY, CARDIOLOGY                                                                                                                                                                                                                 |
|                                 |                                                                                                                                                                                                                                                                            |

SCHOLARONE™  
Manuscripts

1  
2  
3 **A systematic review of qualitative research on the**  
4 **contributory factors leading to medicine-related problems**  
5 **from the perspectives of adult patients with cardiovascular**  
6 **diseases and diabetes mellitus**  
7  
8  
9

10 A Al Hamid, *PhD candidate (aalhamid@herts.ac.uk)*<sup>1</sup>, M Ghaleb, *Senior*  
11 *lecturer in pharmacy practice/patient safety*<sup>1</sup>, H Aljadhey, *Assistant professor*  
12 *in clinical pharmacy*<sup>2</sup> and Z Aslanpour, *Head of pharmacy and public health*  
13 *practice*<sup>1</sup>  
14  
15

16  
17 **Authors Affiliations**  
18

19 <sup>1</sup> *Department of Pharmacy, School of Life and Medical Sciences, University of*  
20 *Hertfordshire, Hatfield, AL10 9AB, UK.*

21 <sup>2</sup> *Medication Safety Research Chair, Clinical Pharmacy Department, College*  
22 *of Pharmacy, King Saud University, Riyadh, P.O. Box 2457, Saudi Arabia.*  
23  
24  
25

26 **Correspondence to:**

27 Mr A M Al Hamid  
28 Department of Pharmacy  
29 University of Hertfordshire  
30 College Lane Campus  
31 Hatfield, Herts  
32 AL10 9AB (UK)  
33 Telephone: +44 (0)1707-287242  
34 Fax: +44 (0)1707-285406  
35 Email: a.alhamid@herts.ac.uk  
36  
37

38  
39 **Keywords:** *Medicine-related problems, patients' perspectives, risk factors,*  
40 *cardiovascular diseases, and diabetes mellitus.*  
41

42 **Word Count:** 3995

43  
44 **Number of figures and tables:** one figure and two tables  
45

46 **Conflict of interest:** The authors declare no conflict of interest  
47

48  
49 **Disclaimer:** I confirm that the views expressed in the submitted article are my  
50 own and not an official position of the institution or funder.  
51

52 **We have read and understood BMJ policy on declaration of interests and**  
53 **declare the following interests:** None  
54  
55  
56  
57  
58  
59  
60

## ABSTRACT

**Objectives** To synthesise contributing factors leading to medicine-related problems (MRPs) in adult patients with cardiovascular diseases and/or diabetes mellitus from their perspectives.

**Design** A systematic literature review of qualitative studies regarding the contributory factors leading to MRPs, medication errors, and non-adherence, followed by a thematic synthesis of the studies.

**Data sources** We screened Pubmed, Embase, ISI Web of Knowledge, PsycInfo, International Pharmaceutical Abstract, and PsycExtra for qualitative studies (Interviews, focus groups, and questionnaires of a qualitative nature).

**Review methods** Thematic synthesis was achieved by coding and developing themes from the findings of qualitative studies.

**Results** The synthesis yielded 21 studies satisfied the inclusion and exclusion criteria. Three themes emerged that involved contributing factors to MRPs: patient-related factors including both socioeconomic factors (beliefs, feeling victimised, history of the condition, lack of finance, lack of knowledge/motivation/understanding, and low self-esteem) and lifestyle factors (diet, lack of exercise/time to see the doctor, obesity, smoking, and stress), medicine-related factors (belief in natural remedies, fear of medicine, lack of belief in medicines, lack of knowledge, non-adherence, and polypharmacy), and condition-related factors (lack of knowledge/understanding, fear of condition and its complications, stress, and lack of control).

**Conclusions** MRPs represent a major health threat, especially among adult patients with cardiovascular diseases and/or diabetes mellitus. The patients' perspectives uncovered hidden factors that could cause and/or contribute to MRPs in these groups of patients.

**Article focus**

- CVDs and DM represent a major health issue that accounts for more than half of the total death rate worldwide.
- The contribution of patients' beliefs and behaviours towards their medicines /conditions and its subsequent involvement in MRPs is still under-researched.
- An exploration of the contributory factors leading to MRPs in patients with CVDs/DM could help inform prospective interventions.

**Key messages**

- MRPs constitute a major health concern especially for adult patients with CVDs and/or DM.
- Whereas medicine-related factors play important role in the incidence of MRPs; other contributing factors can be involved and include: Patient-related, life-style and clinical-related factors.
- Identifying the contributory factors leading to MRPs could help in mitigating/preventing incidence of MRPs. Thus, data from qualitative studies must be integrated with those of quantitative nature to develop efficient and practical interventions.

**Strengths and limitations of the study**

- Timely systematic review considering the qualitative research can substantiate the previous knowledge in the literature obtained from the quantitative studies.
- Difficult to generalise findings due to the limited number of countries included (12 countries).
- Non English publications were underrepresented.

## INTRODUCTION

Medicine-related problems (MRPs) emerged as a concept in the early 1990s as “the detrimental experience regarding drug therapy and which potentially or actually causes an interference with their desired outcome.”[1] MRPs affect both healthcare and economic situations and contribute to a tremendous increase in morbidity, mortality and healthcare expenditure worldwide.[2–4]

MRPs represent a major issue, particularly in chronic conditions such as cardiovascular diseases (CVDs) and diabetes mellitus (DM).[5] The aforementioned conditions are expected to be the major source of morbidity by 2020.[6, 7] In addition, these two conditions are interrelated; it has been documented that DM is a key factor that leads to CVDs as people with diabetes are three to four times more likely to have a CVD.[8, 9] Consequently, the combination of CVDs and DM, which can result in multiple complications, represents a major concern for healthcare professionals.

More specifically, patients with CVDs and/or DM are more susceptible to MRPs due to long-term use of medicines and the inevitable polypharmacy.[7, 10, 11] However, many additional factors that contribute to MRPs in patients with CVDs and/or DM have gone underreported.

Studies in the literature, which investigated risk factors contributing to MRPs in patients with CVDs/DM, were mainly quantitative; only few studies were qualitative. Quantitative studies investigating risk factors contributing to MRPs involved either direct observations or were made retrospectively using data extracted from medical records.[12–14] However, most of the studies reported old age and polypharmacy extensively; few studies reported gender, depression, education, cohabitation, and immobilisations.[15] Nonetheless, qualitative studies investigating contributory risk factors leading to MRPs have been rather limited.

1  
2  
3 Therefore, this review aims to explore and evaluate contributory factors  
4 leading to MRPs among adult patients with CVDs and/or DM from their  
5 perspectives.  
6  
7

## 8 9 **METHODS**

10 We searched the PubMed, Embase, ISI Web of Knowledge, PsycInfo,  
11 International Pharmaceutical Abstract, and PsycExtra databases for entries  
12 between January 1990 and March 2014. The search strategy evaluated  
13 articles obtained predominantly through databases. Additional articles were  
14 retrieved through the bibliography lists of published reviews, where applicable.  
15  
16  
17

18 The search strategy combined established methodological terms for  
19 qualitative research (qualitative research, qualitative studies, nursing  
20 methodological research, narrative analysis) and the following terms:  
21 Medicine (drug/medication) related problems, medicine (drug/medication) use,  
22 diabetes mellitus, cardiovascular diseases, patients' perspectives, patients'  
23 beliefs, patients' attitudes, patients' views, patients' opinions, patients'  
24 knowledge, patients' behaviours, and contributory factors. In addition, Medical  
25 Subject Headings (MeSH) relating to MRPs, CVDs/DM, risk factors, and  
26 patients' perspectives were explored.  
27  
28  
29  
30  
31  
32  
33  
34  
35  
36  
37

### 38 **Study selection**

39 We included studies that involved phone interviews, face-to-face interviews,  
40 focus groups, and open-ended questionnaires that were published in peer-  
41 reviewed journals.  
42  
43

44 The inclusion criteria involved studies focusing on the patients' perspectives  
45 on the use of medicines and MRPs and involved adult patients with CVDs  
46 and/or DM.  
47  
48

49 On the other hand, the exclusion criteria flagged studies that were quantitative  
50 in nature, studies with closed-ended questionnaires, and studies focusing on  
51 conditions other than CVD/DM.  
52  
53

54 Initially, one reviewer (AA) conducted the search and did screening for the  
55 titles. At this stage, studies with irrelevant titles were excluded. Then, the  
56  
57  
58  
59  
60

1  
2  
3 abstracts of the remaining studies were evaluated independently for inclusion  
4 by two reviewers (MG and ZA). Any disagreements that were encountered  
5 were resolved via a discussion. No language limits were applied and non-  
6 English studies were translated into English.  
7  
8  
9

### 10 11 **Data synthesis and analysis**

12 We used the systematic review approach to extract data from relevant  
13 articles.[16] For data synthesis, we adopted the thematic analysis  
14 approach,[17] which is able to extract concepts and hypotheses from multiple  
15 qualitative studies. Based on the extracted results, we developed textual  
16 summaries and tables. We were then able to identify emerging themes from  
17 the textual summaries. Subsequently, we agreed upon the final list of themes  
18 through discussions and consensus. Finally, we coded the full list of papers  
19 for the presence or absence of themes. The codes were tabulated afterwards  
20 by country in order to inspect similarities and differences across countries.  
21  
22  
23  
24  
25  
26  
27  
28

29 Since our approach was qualitative, the presence of a theme in more than  
30 one paper did not indicate its importance in the studied population.[18]  
31 However, a theme appearing in more than one paper did denote to a degree  
32 its validity. Thus, the number of studies within a specific theme was reported  
33 in this review.  
34  
35  
36  
37  
38

### 39 **Quality of synthesis assessment**

40 The quality of papers was assessed using the checklist developed by Dixon-  
41 Woods et al. (2004).[16] This assessment was based mainly on clarity,  
42 consideration of ethical issues, and transferability of the sample, data, and  
43 analysis across different settings. Furthermore, the critical appraisal skills  
44 programme criteria[19] were used to rank the papers based on 10 questions  
45 that fulfilled the clarity, methods, and results of the studies. Consequently,  
46 studies were grouped into low (one star: 0 to 3 points), medium (two stars: 4  
47 to 7 points), and high quality (three stars: 8 to 10 points). Low-quality studies  
48 were not excluded, but caution was taken when interpreting their results.  
49  
50  
51  
52  
53  
54  
55  
56  
57  
58  
59  
60

1  
2  
3  
4  
5  
6  
7  
8  
9  
10  
11  
12  
13  
14  
15  
16  
17  
18  
19  
20  
21  
22  
23  
24  
25  
26  
27  
28  
29  
30  
31  
32  
33  
34  
35  
36  
37  
38  
39  
40  
41  
42  
43  
44  
45  
46  
47  
48  
49

## RESULTS

A total of 21 studies (including 836 participants) from 12 countries met the inclusion criteria (Table 1) and were conducted in the following countries: Australia,[20] Brazil,[21] Cameroon,[22] Canada,[23] Croatia,[24] Ireland,[25] Malaysia,[26, 27] South Africa,[28] Spain,[29] Taiwan,[30] the United Kingdom,[7, 31–36] and the United States.[37–39] The majority of the studies investigated DMT2 (*n* = 15); fewer studies investigated CVDs. Thus, only two studies investigated hypertension (HTN), one investigated heart failure, and one studied CVDs in general. The remaining two studies investigated DM/HTN and DM/HTN/stroke, respectively. Eight studies used focus groups, 12 used interviews, and one study used a mixture of these methods. The review covered areas related to patients, conditions, and medicines.

Table 1| Characteristics of the included studies

| Study               | Country  | Study type                 | Patients' diagnoses | Method of analysis | Study population                                                                                 | Study settings                                | Study aims                                                                                                                                        | Study quality |
|---------------------|----------|----------------------------|---------------------|--------------------|--------------------------------------------------------------------------------------------------|-----------------------------------------------|---------------------------------------------------------------------------------------------------------------------------------------------------|---------------|
| Al-Qazaz et al 2011 | Malaysia | Semi-structured interviews | DMT2                | Content analysis   | 12 diabetic patients, with at least one year of diabetes and a prescription of oral hypoglycemic | Universiti Sains Malaysia (USM) Health Clinic | To explore diabetic patients' experience and knowledge about diabetes and its medication and to understand the factors contributing to medication | **            |



1  
2  
3  
4  
5  
6  
7  
8  
9  
10  
11  
12  
13  
14  
15  
16  
17  
18  
19  
20  
21  
22  
23  
24  
25  
26  
27  
28  
29  
30  
31  
32  
33  
34  
35  
36  
37  
38  
39  
40  
41  
42  
43  
44  
45  
46  
47  
48  
49

|                      |    |                       |      |                   |                                                                                                                                                                                                                                        |                                                                                              |                                                                                                                               |     |
|----------------------|----|-----------------------|------|-------------------|----------------------------------------------------------------------------------------------------------------------------------------------------------------------------------------------------------------------------------------|----------------------------------------------------------------------------------------------|-------------------------------------------------------------------------------------------------------------------------------|-----|
|                      |    |                       |      |                   |                                                                                                                                                                                                                                        |                                                                                              | adherence in Malaysian population.                                                                                            |     |
| Brown et al 2007     | UK | One-to-one interviews | DMT2 | Thematic analysis | 17 African–Caribbean diabetes patients with age above 18 years; 13 first generation immigrants and four second generation immigrants                                                                                                   | Inner city Nottingham                                                                        | To gain an understanding of how health beliefs influence the way African–Caribbean people with diabetes manage their illness. | *** |
| Choudhury et al 2009 | UK | Structured interview  | DMT2 | Thematic analysis | 14 invited individuals, Bangladeshi (four males and 10 females), in the age range of 26 to 67 years, with DMT2 (had it since six months - 27 years) and were recruited either in Swansea or Birmingham. Interviews were made in either | Participants from local communities in Swansea and Birmingham were invited for the interview | To examine the understanding and beliefs of people with diabetes from the Bangladeshi community living in the UK.             | **  |

1  
2  
3  
4  
5  
6  
7  
8  
9  
10  
11  
12  
13  
14  
15  
16  
17  
18  
19  
20  
21  
22  
23  
24  
25  
26  
27  
28  
29  
30  
31  
32  
33  
34  
35  
36  
37  
38  
39  
40  
41  
42  
43  
44  
45  
46  
47  
48  
49

---

|                     |           |                      |      |                                       |                                                                                                                                                 |                                                                                                                                                                   |                                                                                                                                                                                |
|---------------------|-----------|----------------------|------|---------------------------------------|-------------------------------------------------------------------------------------------------------------------------------------------------|-------------------------------------------------------------------------------------------------------------------------------------------------------------------|--------------------------------------------------------------------------------------------------------------------------------------------------------------------------------|
|                     |           |                      |      |                                       | English or in Sylheti as the researcher was bilingual                                                                                           |                                                                                                                                                                   |                                                                                                                                                                                |
| Coronado et al 2004 | USA       | Focus groups         | DMT2 | Matrix analysis by Morgan and Krueger | 42 Individuals (14 men and 28 women) in six focus groups, who had diabetes, had a family history of diabetes, or knew someone who had diabetes. | Fred Hutchinson Cancer Research Center's project office in Sunnyside, Yakima village and Skagit Valley Community College and at the Catholic church in Burlington | To investigate the perceptions about the causes of and treatments for DMT2 *                                                                                                   |
| Cottrell et al 2013 | Australia | Structured interview | HF   | Repertory grid technique              | 92 patients (older than 18 years) with heart failure                                                                                            | Heart Failure Service outpatient clinic, Royal Brisbane and Women's Hospital in Brisbane, Australia                                                               | To elicit individuals' beliefs about their heart failure treatment and to investigate whether generated constructs were different between adherent and nonadherent patients. * |

---

|                                                                                                                                              |                   |       |                                        |     |                   |                                                                                                                                                                                                                                                                           |                                                                                                                        |                                                                                                                                                                          |    |
|----------------------------------------------------------------------------------------------------------------------------------------------|-------------------|-------|----------------------------------------|-----|-------------------|---------------------------------------------------------------------------------------------------------------------------------------------------------------------------------------------------------------------------------------------------------------------------|------------------------------------------------------------------------------------------------------------------------|--------------------------------------------------------------------------------------------------------------------------------------------------------------------------|----|
| 1<br>2<br>3<br>4<br>5<br>6<br>7<br>8<br>9<br>10<br>11<br>12<br>13<br>14<br>15<br>16<br>17<br>18<br>19<br>20<br>21<br>22<br>23<br>24<br>25    | Gascon et al 2004 | Spain | Focus groups with open ended questions | HTN | Thematic analysis | Seven focus groups of 44 patients (24 men and 20 women), diagnosed with hypertension, between the ages of 18 and 80 years, being treated with antihypertensives for 3 months, being non-compliant and having sufficiently good physical and mental health to participate. | Two primary healthcare centres                                                                                         | To identify factors related to non-compliance with the treatment of patients with hypertension.                                                                          | ** |
| 26<br>27<br>28<br>29<br>30<br>31<br>32<br>33<br>34<br>35<br>36<br>37<br>38<br>39<br>40<br>41<br>42<br>43<br>44<br>45<br>46<br>47<br>48<br>49 | Gordon et al 2007 | UK    | Face-to-face interviews                | CVD | Thematic analysis | 98 patients (41 males and 57 females) in the age range of 32 – 89 years.                                                                                                                                                                                                  | Home interviews of patients recruited from five general surgeries and pharmacy interviews at four community pharmacies | To examine medication-related problems from the perspective of patients with a chronic condition and to identify how they may be supported in managing their medication. | ** |

1  
2  
3  
4  
5  
6  
7  
8  
9  
10  
11  
12  
13  
14  
15  
16  
17  
18  
19  
20  
21  
22  
23  
24  
25  
26  
27  
28  
29  
30  
31  
32  
33  
34  
35  
36  
37  
38  
39  
40  
41  
42  
43  
44  
45  
46  
47  
48  
49

|                    |     |              |            |                   |                                                                                                                                                                                                                                               |                                                            |                                                                                                                                                             |     |
|--------------------|-----|--------------|------------|-------------------|-----------------------------------------------------------------------------------------------------------------------------------------------------------------------------------------------------------------------------------------------|------------------------------------------------------------|-------------------------------------------------------------------------------------------------------------------------------------------------------------|-----|
| Grace et al 2008   | UK  | Focus groups | DMT2       | Thematic analysis | 17 focus groups of adult diabetic patients                                                                                                                                                                                                    | Tower Hamlets, a socioeconomically deprived London borough | To understand lay beliefs and attitudes, religious teachings, and professional perceptions in relation to diabetes prevention in the Bangladeshi community. | *** |
| Heymann et al 2012 | UK  | Focus groups | DM and HTN | Thematic analysis | 10 focus groups of 86 (42 males and 44 females) patients with hypertension in three age ranges: 41-50, 51-60, 61-70 years (six groups); and patients with hypertension and DM in the age ranges: 51-60, 61-70 years (a total of four groups). | UK                                                         | To explore beliefs and perceptions regarding hypertension and gain an understanding of barriers to treatment among patients with and without DM.            | *** |
| Hu et al 2013      | USA | Focus groups | DMT2       | Content analysis  | Five focus groups of 73 Hispanic immigrants; 18 years or older                                                                                                                                                                                | free health clinic in central North Carolina               | To explore perceived barriers among Hispanic immigrants with                                                                                                | **  |

diabetes  
and their family  
members.

|                   |          |                                      |                      |                   |                                                                                                                                                                                                                   |                                                                                      |                                                                                                                                 |     |
|-------------------|----------|--------------------------------------|----------------------|-------------------|-------------------------------------------------------------------------------------------------------------------------------------------------------------------------------------------------------------------|--------------------------------------------------------------------------------------|---------------------------------------------------------------------------------------------------------------------------------|-----|
| Jolles et al 2013 | Canada   | Semi-structured interviews           | HTN                  | Thematic analysis | 26 Patients, in the age range of 26 - 85 years and 62% females, able to speak, read and write English; diagnosed with hypertension by a healthcare provider, and currently taking an antihypertensive medication. | Two hypertension clinics at the University of Alberta in Edmonton                    | To understand hypertensive patients' perspectives regarding blood pressure and hypertension treatment.                          | **  |
| Kiawi et al 2006  | Cameroon | In-depth interviews, semi-structured | DMT2, HTN and stroke | Content analysis  | 15 interviews of 62 patients (27 women and five men), selection criteria included they had lived at least six months in the community, were nominated by other community members, and                             | Four urban health districts, one from each of the main ecological areas of Cameroon. | To investigate of lay knowledge, attitudes, and behaviors relating to diabetes and its main risk factors of urban Cameroonians. | *** |

1  
2  
3  
4  
5  
6  
7  
8  
9  
10  
11  
12  
13  
14  
15  
16  
17  
18  
19  
20  
21  
22  
23  
24  
25  
26  
27  
28  
29  
30  
31  
32  
33  
34  
35  
36  
37  
38  
39  
40  
41  
42  
43  
44  
45  
46  
47  
48  
49

were age  
above 15  
years.

|                          |          |                                              |      |                          |                                                                                                                                     |                                                             |                                                                                                                                                                      |     |
|--------------------------|----------|----------------------------------------------|------|--------------------------|-------------------------------------------------------------------------------------------------------------------------------------|-------------------------------------------------------------|----------------------------------------------------------------------------------------------------------------------------------------------------------------------|-----|
| Lai et al 2005           | Taiwan   | In-depth interviews                          | DMT2 | Themati<br>c<br>analysis | 22 diabetic patients (12 males and 10 females), in the age range of 44 - 80 years, with a duration of illness more than one year.   | Rural Taiwan community                                      | To investigate Chinese diabetic patients' perceptions about their illness and treatment strategies to facilitate patient-centred, culture-sensitive clinical skills. | **  |
| Lawton et al. 2006       | UK       | In-depth interviews with open-ended approach | DMT2 | Themati<br>c<br>analysis | 31 patients (23 Pakistani and eight Indian), aged 18 years and over, and diagnosed with DMT2                                        | General Practices in Edinburgh                              | Patients' perception and practical considerations                                                                                                                    | **  |
| Mohd Ali and Jussof 2009 | Malaysia | In-depth open-ended interviews               | DMT2 | Themati<br>c<br>analysis | 18 patients (9 males and 9 females) in the age of 15-75 years, and 13 healthcare professionals (nine doctors, three pharmacists and | Endocrinology clinic of a teaching hospital in Kuala Lumpur | To explore the perspectives and experiences of Malay patients in managing Type 2 diabetes as a chronic illness and provide recommendatio                             | *** |

1  
2  
3  
4  
5  
6  
7  
8  
9  
10  
11  
12  
13  
14  
15  
16  
17  
18  
19  
20  
21  
22  
23  
24  
25  
26  
27  
28  
29  
30  
31  
32  
33  
34  
35  
36  
37  
38  
39  
40  
41  
42  
43  
44  
45  
46  
47  
48  
49

|                      |              |                                                                                                                                       |      |                   |                                                                                                                     |                                                         |                                                                                                                                                                                                    |     |
|----------------------|--------------|---------------------------------------------------------------------------------------------------------------------------------------|------|-------------------|---------------------------------------------------------------------------------------------------------------------|---------------------------------------------------------|----------------------------------------------------------------------------------------------------------------------------------------------------------------------------------------------------|-----|
|                      |              |                                                                                                                                       |      |                   | one diabetic nurse educator).                                                                                       |                                                         | ns that aim to enhance adherence to treatment and help patients to improve their self-management skills.                                                                                           |     |
| Mshunqane et al 2012 | South Africa | Patient focus groups (n = 10) and healthcare professional focus groups (n = 8) and in-depth interviews. The questions were open-ended | DMT2 | Thematic analysis | Patients who had been diagnosed with type 2 diabetes for at least one year, who were between 30 and 65 years of age | Dr George Mukhari Hospital outpatients' diabetes clinic | To determine the knowledge that patients with type 2 diabetes have about the management of their disease, as well as the perceptions of the health care team about the services given to patients. | *** |
| Peel et al 2004      | UK           | In-depth interviews                                                                                                                   | DMT2 | Thematic analysis | 40 newly diagnosed DMT2 patients in the age range of 21 – 77 years                                                  | Across the Lothian region in Scotland                   | To explore the patients' emotional reactions about their DMT2 diagnosis, and their views about information provision at the time of                                                                | **  |

diagnosis.

|                     |         |              |      |                   |                                                                                                                                                       |                                                                                         |                                                                                                                                        |    |
|---------------------|---------|--------------|------|-------------------|-------------------------------------------------------------------------------------------------------------------------------------------------------|-----------------------------------------------------------------------------------------|----------------------------------------------------------------------------------------------------------------------------------------|----|
| Peres et al 2007    | Brazil  | Interviews   | DMT2 | Content analysis  | 24 diabetic females, age between 25 and 76 years old, literate, with eight years of schooling, from Ribeirão Preto, who perform household activities. | Nursing Education Center for Adults and Elderly - CEEAI, University of São Paulo        | Identify the difficulties patients encounter when controlling diabetes                                                                 | ** |
| Rustveld et al 2009 | USA     | Focus groups | DMT2 | Thematic analysis | 34 patients in six focus groups (three in English and three in Spanish), older than 18 years and with DMT2                                            | Three Harris County Hospital District (HCHD) community health centers in Houston, Texas | To elicit attitudes, attributions, and self-efficacy related to diabetes self-care in both English- and Spanish-speaking Hispanic men. | ** |
| Smith et al 2003    | Ireland | Focus groups | DMT2 | Thematic analysis | 25 patients from three general practices, having DM for at least one year                                                                             | Patients were invited to participate in the focus group                                 | To explore the views and health beliefs of patients with Type 2 diabetes who had experienced                                           | ** |



a new structured diabetes shared care service.

|                            |         |              |      |                   |                                                                                                                                                                                                                                                    |                       |                                                                                                                                                                                                                              |     |
|----------------------------|---------|--------------|------|-------------------|----------------------------------------------------------------------------------------------------------------------------------------------------------------------------------------------------------------------------------------------------|-----------------------|------------------------------------------------------------------------------------------------------------------------------------------------------------------------------------------------------------------------------|-----|
| Vinter-Repalust et al 2004 | Croatia | Focus groups | DMT2 | Thematic analysis | Seven focus groups of 49 patients (22 males and 27 females), in the age range of 44 - 83 years, ambulatory patients with the diagnosis of DMT2, with differences not only in age and sex, but also in the method of treatment of diabetes as well. | Zagreb Medical School | To explore type 2 diabetic patients' attitudes, thoughts, and fears connected with their illness; their expectations of the health care system; and the problems they encountered while adhering to the therapeutic regimen. | *** |
|----------------------------|---------|--------------|------|-------------------|----------------------------------------------------------------------------------------------------------------------------------------------------------------------------------------------------------------------------------------------------|-----------------------|------------------------------------------------------------------------------------------------------------------------------------------------------------------------------------------------------------------------------|-----|

1  
2  
3  
4  
5  
6  
7  
8  
9  
10  
11  
12  
13  
14  
15  
16  
17  
18  
19  
20  
21  
22  
23  
24  
25  
26  
27  
28  
29  
30  
31  
32  
33  
34  
35  
36  
37  
38  
39  
40  
41  
42  
43  
44  
45  
46  
47  
48  
49

## Narrative synthesis

The main findings of the review showed that contributory factors to MRPs involved three themes: patient-related (socioeconomic and lifestyle), medicine-related, and condition-related factors. Table 2 lists the studies that reported or discussed each theme.

Table 2| Themes and subthemes emerging from the studies

| Theme/ Sub-theme                                      | Countries, studies                                                                                                                                                                                                                                                                                                                                                                         |
|-------------------------------------------------------|--------------------------------------------------------------------------------------------------------------------------------------------------------------------------------------------------------------------------------------------------------------------------------------------------------------------------------------------------------------------------------------------|
| <b><i>Patient related factors (socioeconomic)</i></b> |                                                                                                                                                                                                                                                                                                                                                                                            |
| Belief                                                | UK (Brown et al 2007, Grace et al 2008, Lawton et al 2006)                                                                                                                                                                                                                                                                                                                                 |
| Family history of condition                           | UK (Grace et al 2008, Lawton et al 2006), USA (Coronado et al 2004)                                                                                                                                                                                                                                                                                                                        |
| Feeling victimised                                    | South Africa (Mshunqane et al 2012), Croatia (Vinter-Repalust et al 2004), Ireland (Smith et al 2002)                                                                                                                                                                                                                                                                                      |
| Lack of finance                                       | Ireland (Smith et al 2002), South Africa (Mshunqane et al 2012), Croatia (Vinter-Repalust et al 2004), USA (Hu et al 2013)                                                                                                                                                                                                                                                                 |
| Lack of knowledge                                     | Croatia (Vinter-Repalust et al 2004)                                                                                                                                                                                                                                                                                                                                                       |
| Lack of motivation                                    | Croatia (Vinter-Repalust et al 2004)                                                                                                                                                                                                                                                                                                                                                       |
| Lack of information/ understanding from doctors       | UK (Brown et al 2007, Choudhury et al 2009)                                                                                                                                                                                                                                                                                                                                                |
| Low self-esteem                                       | Croatia (Vinter-Repalust et al 2004), USA (Rustveld et al 2009)                                                                                                                                                                                                                                                                                                                            |
| <b><i>Patient related factors (life-style)</i></b>    |                                                                                                                                                                                                                                                                                                                                                                                            |
| Decrease alcohol intake                               | Canada (Jolles et al 2013),                                                                                                                                                                                                                                                                                                                                                                |
| Decrease caffeine intake                              | Canada (Jolles et al 2013), South Africa (Mshunqane et al 2012)                                                                                                                                                                                                                                                                                                                            |
| Diet                                                  | Australia (Cotrell et al 2013), Brazil (Peres et al 2007), Canada (Jolles et al 2013), Croatia (Vinter-Repalust et al 2004), Ireland (Smith et al 2002), UK (Brown et al 2007, Choudhury et al 2009, Grace et al 2008, Heymann et al 2012, Lawton et al 2006), USA (Coronado et al 2004, Hu et al 2013, Rustveld et al 2009), South Africa (Mshunqane et al 2012), Taiwan (Lai et al 2005) |
| Lack of exercise                                      | Brazil (Peres et al 2007), Canada (Jolles et al 2013), UK (Brown et al 2007, Choudhury et al 2009, Grace et al 2008, Heymann et al 2012, Lawton et al 2006), South Africa (Mshunqane et al 2012), USA (Coronado et al 2004, Hu et al 2013, Rustveld et al 2009)                                                                                                                            |

|                                                              |                                                                                                                                                                                                                                                                                                            |
|--------------------------------------------------------------|------------------------------------------------------------------------------------------------------------------------------------------------------------------------------------------------------------------------------------------------------------------------------------------------------------|
| Lack of time to see doctor                                   | Malaysia (Al-Qazaz et al 2011)                                                                                                                                                                                                                                                                             |
| Obesity                                                      | Brazil (Peres et al 2007),<br>South Africa (Mshunqane et al 2012),<br>UK (Brown et al 2007), USA (Coronado et al 2004)                                                                                                                                                                                     |
| Smoking                                                      | Canada (Jolles et al 2013),<br>UK (Heymann et al 2012)                                                                                                                                                                                                                                                     |
| Stress                                                       | Ireland (Smith et al 2002),<br>UK (Brown et al, 2007, Grace et al 2008, Heymann<br>et al 2012), USA (Coronado et al 2004)                                                                                                                                                                                  |
| <b>Medicine related factors</b>                              |                                                                                                                                                                                                                                                                                                            |
| Belief in natural remedies as<br>alternative to medicines    | Spain (Gascon et al 2004),<br>UK (Brown et al 2007), USA (Coronado et al 2004)                                                                                                                                                                                                                             |
| Difficulty/ refusal to take<br>medicine                      | Brazil (Peres et al 2007),<br>Croatia (Vinter-Repalust et al 2004)                                                                                                                                                                                                                                         |
| Fear of being stuck with<br>medicines all life               | Spain (Gascon et al 2004),<br>UK (Gordon et al 2007)                                                                                                                                                                                                                                                       |
| Fear of side effects                                         | Ireland (Smith et al 2002), Malaysia (Al-Qazaz et al<br>2011), UK (Heymann et al 2012), Spain (Gascon et<br>al 2004), Taiwan (Lai et al 2005)                                                                                                                                                              |
| Fear of the chemical nature<br>of medicines                  | Taiwan (Lai et al 2005), UK (Brown et al 2007)                                                                                                                                                                                                                                                             |
| Forgetfulness                                                | Brazil (Peres et al 2007), Malaysia (Al-Qazaz et al<br>2011, Mohd Ali and Jusoff 2009), Spain (Gascon et<br>al 2004)                                                                                                                                                                                       |
| Lack of belief in medicines                                  | Australia (Cotrell et al 2013)                                                                                                                                                                                                                                                                             |
| Lack of knowledge about<br>medicines mechanism of<br>actions | Canada (Jolles et al 2013),<br>Spain (Gascon et al 2004), UK (Gordon et al 2007)                                                                                                                                                                                                                           |
| Non-adherence                                                | Canada (Jolles et al 2013), Croatia (Vinter-<br>Repalust et al 2004), Taiwan (Lai et al 2005), UK<br>(Gordon et al 2007), USA (Hu et al 2013, Rustveld<br>et al 2009)                                                                                                                                      |
| Polypharmacy                                                 | Brazil (Peres et al 2007),                                                                                                                                                                                                                                                                                 |
| <b>Condition related factors</b>                             |                                                                                                                                                                                                                                                                                                            |
| Lack of control over condition                               | Brazil (Peres et al 2007), Ireland (Smith et al 2002)                                                                                                                                                                                                                                                      |
| Lack of knowledge/<br>understanding<br>of condition          | Australia (Cotrell et al 2013), Cameroon (Kiawi et al<br>2006), Canada (Jolles et al 2013), Malaysia (Al-<br>Qazaz et al 2011, Mohd Ali and Jusoff 2009), Spain<br>(Gascon et al 2004), UK (Brown et al 2007,<br>Choudhury et al 2009, Heymann et al 2012, Peele<br>et al 2004), USA (Coronado et al 2004) |
| Fear of condition, its causes<br>and complications           | South Africa (Mshunqane et al 2012),<br>UK (Choudhury et al 2009, Lawton et al 2006), USA<br>(Coronado et al 2004)                                                                                                                                                                                         |
| Stress from condition                                        | Croatia (Vinter-Repalust et al 2004)                                                                                                                                                                                                                                                                       |

## Patient-related factors

### *Socioeconomic-related factors*

Patients from six countries reported socioeconomic factors leading to MRPs in both DM and CVDs, including: beliefs, family history of the condition, poor finances, relationships with healthcare professionals (lack of communication and not enough education), inadequate knowledge, and low self-esteem (Table 2).

Beliefs regarding CVDs/DM were reported as a problem in three studies from the United Kingdom.[31, 33, 35] Patients perceived that DM was given by God and higher powers had control over their condition. One patient reported:

*“God has given me this disease of sugar. Whatever happens, it happens because God wants it to happen.”*

Moreover, a family history of DM was reported in three studies from the United Kingdom[33 40] and the United States.[37]

In addition, poor finances were reported by patients in four studies from Ireland,[25] South Africa,[28] Croatia,[24] and the United States.[38] A lack of necessary finances prevents patients from buying the appropriate food (for their diet)[28] and going to doctors.[25]

Consequently, the financial situation implicated the relationship of the patients with the healthcare professionals. Patients have reported that they were not getting value for their money from healthcare providers.[25] For instance, one patient reported:

*“I don’t mind paying when I’m sick, but it’s very expensive to pay the GP when I’m only getting a check-up with the nurse.”*

Thus, the patients felt victimised by healthcare professionals[24, 25, 28] and reported a lack of communication with healthcare professionals.[17] They

1  
2  
3 described doctors as either too busy to see them[25, 26] or not giving enough  
4 information about diagnosis and medicines.[31, 32, 36] Other patients  
5 reported having been belittled by doctors.[24] In another study, patients  
6 accounted for the lack of communication with healthcare professionals by  
7 language barriers.[32]  
8  
9

10  
11  
12  
13 Subsequently, patients reported a lack of knowledge as a major cause for  
14 DMT2.[24] This situation led to the lack of motivation about their disease and  
15 affected the intake of medicines. Patients asserted the need for further  
16 education and training about their condition.  
17  
18  
19

20  
21 A lack of knowledge resulted in the patients' low-self esteem towards their  
22 condition.[24, 39] Hence, patients felt unaccepted socially, less comfortable  
23 with their colleagues, and less worthy for being diabetic.[24, 39]  
24  
25  
26

#### 27 28 *Lifestyle-related factors*

29 Lifestyle-factors were reported in studies from 11 countries and included: diet  
30 (excessive alcohol/caffeine intake), lack of exercise, lack of time to see the  
31 doctor, obesity, smoking, and stress.  
32  
33  
34

35  
36 Diet was a major issue stated in 16 studies (Table 2). In this respect, patients  
37 had different behaviours towards their diet. For instance, one group of  
38 patients admitted the importance of a healthy diet, yet could not control their  
39 diets.[21, 30–32] Thus, one participant reported:[21]  
40  
41  
42

43  
44  
45 *“Regarding the diet, I try to fight so as not to eat*  
46 *certain foods, but sometimes I can't help myself.”*  
47  
48

49 In this respect, patients appreciated the importance of a healthy diet in  
50 controlling DM,[31] yet overestimated its importance to be beyond  
51 medicines.[30] They were also aware that a poor diet, including excess  
52 alcohol[23] and caffeine intake,[23, 28] exacerbated their conditions. Another  
53 group of patients misunderstood the concept of a healthy diet. They believed  
54 that eating bitter foods could control DM[32] or applied portion sizes to their  
55  
56  
57  
58  
59  
60

1  
2  
3 diets.[39] In the latter case, patients had difficulty eating smaller portions  
4 and/or even changing their favourite foods. On other occasions, patients  
5 claimed that diet quality was responsible for DM.[25]  
6  
7

8  
9  
10 In addition, a lack of exercise was reported in 11 studies from five countries,  
11 including Brazil,[21] Canada,[23] the United Kingdom,[31–35, 40] South  
12 Africa,[28] and the United States.[37–39] A group of patients overestimated  
13 the importance of exercise, claiming that it can cure any existing disease.[30]  
14 Patients reported difficulty exercising although they were aware of its  
15 importance.[35, 39] They justified their work, travel, stress, the weather, and  
16 lack of time as the reasons behind their decreased physical exercise.[21, 32,  
17 33, 35, 38] A lack of time was more reported in females whose culture  
18 expected them to stay indoors after they got married.[35]  
19  
20  
21  
22  
23  
24  
25

26 Moreover, obesity was described in four studies (Brazil,[21] South Africa,[28]  
27 the United Kingdom,[31] and the United States[41]) as a cause of DM.  
28 Patients blamed weight gain as the cause for their increase in blood glucose  
29 level and diabetic complications.[31, 37] Moreover, they attributed insulin as  
30 one of the causes of obesity.[31]  
31  
32  
33  
34  
35

36 Stress emerged in five studies from three countries, including Ireland,[25] the  
37 United Kingdom,[31, 33, 34] and the United States.[41] Stress was identified  
38 as a result of changes in culture and climate, poor housing, and migration of  
39 ethnic minorities.[37] Patients considered stress to be major cause of their  
40 condition.[25, 31, 33, 34, 39, 41] For instance, one patient reported:  
41  
42  
43  
44  
45

46 *“In 1998, my mother died, and I was unable to go to the funeral. During these*  
47 *months, I developed diabetes.”*  
48  
49

50  
51 Patients also perceived that stress control could be an effective way to cure  
52 their condition[33] since stress led to a poor diet, smoking, and a lack of  
53 exercise.  
54  
55  
56  
57  
58  
59  
60

### **Medicine-related factors**

Medicine-related factors were found in 14 studies from 11 countries and included two types of factors: factors related to the use of medicines and factors related to knowledge about medicines.

Factors related to the use of medicines included medicine non-adherence and polypharmacy. Medicine non-adherence was reported in 10 studies from seven countries, including Brazil,[21] Canada,[23] Croatia,[24] Malaysia,[26, 27] Spain,[29] Taiwan,[30] the United Kingdom,[7] and the United States.[38, 39] Patients justified non-adherence to medicines as difficulty following the treatment regimen,[24] depression and stress,[39] forgetfulness in taking the medicines,[7, 21, 26, 27, 29] a lack of routine in taking the medicines,[23] changes in medicine routines,[23] and the inconvenience of taking insulin. For instance, patients complained that oral hypoglycemics are more convenient to take than insulin:[29]

*“I prefer pills more than insulin. You know, swallowing a pill causes no pain. And when I know I will eat more I just take another pill or an extra half.”*

Furthermore, intentional non-adherence was reported in some studies where patients changed their insulin doses depending on their food regimen.[29] In another scenario, patients stopped taking their medicines when they exercised, acting on the assumption that exercise reduces blood sugar level. Thus, patients changed the dose/regimen of their medicines to fit with their daily activities.[7]

Polypharmacy was reported among patients with DMT2 in two studies from Brazil[21] and Canada.[27] Polypharmacy caused inconvenience in taking medicines:[21]

*“Medication: this has been my biggest problem in this current phase. I take medication for blood pressure, circulation, diabetes, vitamins. I used to mix up the time of each, but today, thanks to orientation, I’m overcoming this*

1  
2  
3 *stage.”*  
4  
5

6 Factors relating to knowledge about medicines included lack of knowledge  
7 about how the medicines worked, fear of the chemical nature of medicines  
8 and their side effects, and a lack of belief in medicine.  
9

10  
11  
12 The lack of knowledge about how medicines worked was described in three  
13 studies in Canada,[23] the United Kingdom,[7] and Spain.[29] Patients could  
14 not identify most of their medicines apart from the diuretics, which they called  
15 “water pills.”[23] Moreover, patients could not understand how their medicines  
16 worked, even when they read the patient information leaflet.[29]  
17  
18

19  
20  
21 This lack of knowledge created fear in patients regarding the chemical nature  
22 of medicines, the side effects of medicines, and being obliged to take  
23 medicines all of their lives.[7, 25, 26, 29–31, 34] For instance, patients  
24 referred to oral hypoglycemic agents and insulin as “pharmaceutical  
25 toxins.”[30]  
26  
27

28  
29  
30 Additionally, patients were afraid of the side effects and complications of  
31 medicines. They attributed various side effects to medicines, including  
32 hypoglycemia and gastrointestinal disturbances to insulin,[31] kidney failure to  
33 oral hypoglycemic agents,[30] and nausea/vomiting to antihypertensive  
34 agents.[29] In the last case, a patient reported:  
35  
36

37  
38  
39  
40  
41  
42  
43 *“I don’t like them (medicines); they have lots of side*  
44 *effects. They can make you sick... I think that I might*  
45 *get worse instead of better.”*  
46  
47  
48

49  
50 These fears promoted a lack of belief in medicines among patients.[20]  
51 Subsequently, patients started to believe in natural remedies as an alternative  
52 to medicines.[29, 31, 41] They referred to natural therapies as “a cure” that  
53 should be used alongside traditional medicines.[41] In another scenario,  
54 patients believed that natural therapies were superior to medicines.[31] In this  
55 respect, natural therapies reported for curing DM included natural drinks  
56  
57  
58  
59  
60



1  
2  
3 (composed of minerals and water);[41] and plant products (such as aloe vera,  
4 arnica, cactus, silk cottonwood tree, tree spinach, and violet water).[31]  
5  
6

### 7 8 **Condition-related factors** 9

10  
11 Condition (clinical)-related factors were reported from 11 countries as a major  
12 theme. Factors included a lack of knowledge/understanding of the condition,  
13 fear of the condition and its complications, stress from the condition, and a  
14 lack of control over the condition.  
15  
16

17  
18  
19 Lack of knowledge/understanding of the condition (CVDs/DM) emerged as a  
20 major theme in 11 studies from seven countries, including Australia,[20]  
21 Cameroon,[22] Canada,[23] Malaysia,[26, 27] Spain,[29] the United  
22 Kingdom,[31, 32, 34, 36] and the United States.[41]  
23  
24  
25  
26

27  
28 For CVDs, patients expressed a lack of knowledge about their heart failure,  
29 hypertension, and stroke. Patients with heart failure did not know enough  
30 about their disease symptoms.[20] Moreover, hypertensive patients did not  
31 understand the nature of their disease,[27, 29] struggled to define their  
32 condition,[23] and considered it an underlying risk factor to myocardial  
33 infarction rather than a disease.[34] Patients justified their lack of knowledge  
34 by citing short consultations with physicians, not obtaining enough information  
35 from physicians, and obtaining information from non-medical sources such as  
36 television and magazines. For instance, one patient reported:  
37  
38  
39  
40  
41  
42

43  
44  
45 *“Anything I know about blood pressure I’ve read in books, the doctor tells me*  
46 *absolutely nothing . . . High blood pressure: factors related to compliance with*  
47 *treatment 127. I want him to tell me where high blood pressure comes from.”*  
48  
49

50  
51 Similarly, patients with DM lacked knowledge about the disease and  
52 misunderstood its causes and complications.[22, 24, 26, 28, 31, 32, 35]  
53 Regarding the DM condition and causes, patients’ perceptions of DM were  
54 influenced by other people’s accounts and experiences.[31] Patients viewed  
55 the condition as an illness that took away their health and strength[35] and  
56  
57  
58  
59  
60

1  
2  
3 changed their lifestyle.[24] They could not differentiate between DMT1 and  
4 DMT2,[26] considered high sugar intake to be the cause of DM, and  
5 perceived DM to be sexually and genetically transmitted.[22, 32] Moreover,  
6 patients believed that diabetes was not dangerous if it did not require  
7 insulin.[31] Patients were only aware of the microvascular complications (such  
8 as foot disease) of DM.[25] Moreover, they were aware of the disease's signs  
9 and symptoms (such as dry mouth, tiredness, dizziness, irritation, blurred  
10 vision, micturition, and extreme thirst) only after they encountered them.[27,  
11 41]  
12  
13  
14  
15  
16  
17

18  
19 The lack of knowledge about the condition created fear in the patients' minds  
20 of the disease itself[41] and they could not accept the disease easily.[24, 32]  
21 One patient reported:[41]  
22  
23

24  
25  
26 *"Diabetes is a disease that kills you little by little."*  
27  
28

29 Diseases additionally resulted in stress about the condition that was  
30 particularly observed in patients with multiple comorbidities.[35] For instance,  
31 diabetic patients who had asthma as a comorbidity could not exercise due to  
32 asthma symptoms, such as shortness of breath and swollen feet and joints:  
33  
34  
35

36  
37  
38 *"They tell you to exercise...*

39 *but I can't move around a lot because I have*  
40 *a problem with my leg (arthritis). If I walk a little,*  
41 *then it swells up."*  
42  
43  
44  
45

46 As a result, patients were not able to control their condition,[21, 25] which led  
47 to frustration, depression, and anxiety.  
48  
49

## 50 **DISCUSSION**

51

52 To our knowledge, this review is the first systematic analysis of the  
53 perspectives of adult patients with CVDs/DM on contributory factors leading to  
54 MRPs. We explored the patients' knowledge, beliefs, and behaviours towards  
55  
56  
57  
58  
59  
60

1  
2  
3 medicines. The majority of studies evaluated patients with DM; only a few  
4 studies evaluated patients with CVDs. The four themes emerging from this  
5 review include: socioeconomic-, lifestyle-, clinical-, and medicine-related  
6 factors.  
7  
8  
9

### 10 **Patient-related factors**

#### 11 *Socioeconomic-related factors*

12 Socioeconomic factors (genetic, cultural behaviour, and financial situations)  
13 affected the patients' perceptions of disease and the medicines contributing to  
14 MRPs. Patients perceived genetic factors and religious beliefs to be the cause  
15 of their DM.[18, 20] Patients from both Christian and Muslim backgrounds  
16 named God as the cause for their DM. These attitudes were confirmed by  
17 other studies that showed that religious values contributed to MRPs.[42, 43] In  
18 addition, patients felt socially for their DM, which affected their self-esteem.  
19 They also blamed their financial situation for contributing to MRPs, since their  
20 finances prevented them from having the right diet and being able to afford  
21 doctors' visits. The cost of therapy has been perceived as being important,  
22 particularly with chronic conditions such as CVDs.[44] Thus, the value that the  
23 patients receive from healthcare professionals for their money was  
24 unsatisfactory. In fact, doctors' attitudes towards the patients played an  
25 important role in the patients being compliant with their regimens.[45] This  
26 problem was significant in ethnic minorities where a lack of communication  
27 between doctors and patients lead to misunderstanding.[42] Patients  
28 confirmed the need for further information and training, emphasising the  
29 importance of getting information from healthcare professionals.  
30  
31  
32  
33  
34  
35  
36  
37  
38  
39  
40  
41  
42  
43  
44  
45  
46  
47

#### 48 *Lifestyle-related factors*

49 Lifestyle factors were perceived as a vital component for the control of  
50 conditions (CVDs/DM). Patients felt that they needed to adjust their diet,  
51 engage in physical activity, and manage their moods to cope with conditions.  
52 In relation to diet, they either did not understand the concept of a healthy diet  
53 or they had difficulty managing a good diet. Thus, some patients assumed  
54 that a healthy diet meant eating less food, eating "bitter food," or eating  
55  
56  
57  
58  
59  
60

1  
2  
3 “natural food.” Other patients overestimated the importance of diet as being  
4 more crucial than medicines. This overestimation can be attributed to the fact  
5 that the frequency of meals could serve as a reminder to take medicines.[44]  
6  
7 In addition, patients were aware of the necessity of physical exercise but  
8 blamed the weather, work, lack of time, and stress for their not exercising.[44]  
9  
10 Stress was a major factor that patients blamed for not taking medicines on  
11 time and eating a poor diet.  
12  
13

### 14 15 16 **Medicine-related factors**

17  
18 Medicines were recognised by patients as a contributing factor to MRPs with  
19 regards to lack of knowledge about medicines, lack of belief that medicines  
20 are good, difficulty taking medicines on time, and fear of side effects. Patients  
21 reported a lack of knowledge about how the medicines worked, called them  
22 pharmaceutical toxins, and preferred herbal remedies to medicines. This point  
23 was emphasised in another study[42] that stated that the patients’ lack of  
24 awareness about the use of their medicines led to MRPs. Furthermore,  
25 patients reported skipping medicines doses due to forgetfulness or they did  
26 not take their medicines on purpose (at the time of exercise). Forgetfulness in  
27 terms of taking medicines was observed more often in patients who did not  
28 have regular meals.[44] At other times, patients were scared of the side  
29 effects and complications of medicines. The medicines’ side effects caused  
30 physical discomfort for patients, who started to doubt the therapy’s  
31 effectiveness and skipped their medicines.[44]  
32  
33  
34  
35  
36  
37  
38  
39  
40  
41  
42

### 43 **Condition-related factors**

44  
45 Condition (clinical) factors reported by the patients revealed a lack of  
46 knowledge about the disease and its cause, a lack of control over the disease,  
47 and the existence of comorbidities with the disease.[44] Patients were  
48 accordingly not fully aware of their condition and perceived it in most cases as  
49 being a risk factor leading to other diseases. Moreover, they misidentified the  
50 causes and complications of their condition. Once the education about the  
51 condition was provided, patients felt scared and frustrated, which induced a  
52 lack of control over the disease. Moreover, the existence of comorbidities with  
53 the main condition worsened the patients’ adherence to treatment and advice.  
54  
55  
56  
57  
58  
59  
60

### **Strengths and weaknesses of the review**

This review proposes a systematic and comprehensive approach to qualitative studies of contributory factors to MRPs of adult patients with CVDs/DM. We adopted a thematic synthesis approach to eligible studies regarding the treatment experiences from patients' perspectives. The studies involved 836 participants. However, despite the diversity of the participants and different contexts in the studies, we were able to develop themes that indicated an overlap among the studies.

We used recognised methods from the literature regarding patients' experiences/perspectives in order to synthesise and develop analytical themes.[17, 46] We included the details of each study in relation to the aims, participants, settings, and methods applied. We rated the studies' qualities based on methods from the literature. In this respect, we found that studies with the highest ratings contributed most to the final analytical themes.

One limitation of the review is that it was restricted to the experiences of the patients involved in the studies. Moreover, studies of non-English speaking individuals and people seeking palliative care were underrepresented. Thus, the review was extracted from studies in 12 countries only. Therefore, the generalisability of the findings of this review to patients from different countries (other than the 12 aforementioned countries) may be difficult. However, the analytical themes developed offer a high level of conceptual thinking that can be applied across different contexts.

### **Implications of the research**

This review examined the contribution of patients' perceptions, behaviours, and beliefs in understanding different aspects of underlying risk factors that may lead to MRPs. Syntheses of the qualitative research on such risk factors should complement the findings from quantitative research. Having a systematic review when planning new qualitative research may help to avoid unintentional examination of questions that have already been extensively researched. Finally, the findings of this study on patients' perspectives could

1  
2  
3 better inform the development of future screening tools and interventions for  
4 avoiding MRPs. Additionally, our results may also increase researchers'  
5 knowledge of generic issues in this field, even when attempting to target a  
6 specific ethnic or cultural group.  
7  
8  
9

### 10 11 **Implication towards practices**

12 Patients' perspectives about medicine use and factors affecting their  
13 treatment regimen are often different from the medical viewpoint. Worldwide,  
14 people with CVD and/or DM widely perceive that their conditions are  
15 principally stress-related conditions and fear addiction or dependence on  
16 medicines, which leads to non-adherence to required treatments. These  
17 misconceptions and fears commonly cause people to reduce or stop  
18 treatment. If we are to be successful at minimising and preventing MRPs,  
19 incorporating patients' perspectives as well as considering medical records  
20 are paramount. An increased understanding between doctors and their  
21 patients must play a part in future strategies for reducing MRPs in patients  
22 with CVDs and/or DM.  
23  
24  
25  
26  
27  
28  
29  
30  
31  
32

### 33 **CONCLUSIONS**

34 This thematic synthesis of qualitative studies on patients' perspectives of the  
35 potential risk factors of MRPs shows that underlying factors that may lead to  
36 MRPs require further in-depth research. Factors influencing patients' success  
37 in treatment included patient-related (socioeconomic and lifestyle), medicine-  
38 related (fear of medicine, non-adherence, and polypharmacy), and condition-  
39 related factors (fear of condition and its complications). In summary, more  
40 qualitative research should be conducted on patients with CVDs and/or DM to  
41 understand and address issues related to the treatment regimens and  
42 subsequently reduce the cost of undesired hospital admissions resulting from  
43 MRPs.  
44  
45  
46  
47  
48  
49  
50  
51  
52  
53  
54  
55  
56  
57  
58  
59  
60

1  
2  
3  
4  
5 **Contributors** AA participated in protocol development, literature searching,  
6 data extraction, data analysis, and manuscript preparation. MG participated in  
7 protocol development, data analysis, and manuscript preparation. HA  
8 participated in protocol development, data analysis, and manuscript  
9 preparation. ZA participated in protocol development, literature searching,  
10 data extraction, and manuscript preparation. All authors have read and  
11 approved the final manuscript.  
12  
13  
14  
15

16  
17  
18 **Funding** There are no funders for this work.  
19

20  
21 **Competing interests** None.  
22  
23

24 **Ethics approval** Systematic review.  
25  
26

27  
28 **Provenance and peer review** Not commissioned; externally peer reviewed.  
29  
30

31 **Data sharing statement** No additional data available.  
32  
33  
34  
35  
36

## 37 REFERENCES

- 38 1. Fernandez-Ilimos F, Faus M, Gastelurrutia M, et al. Evolution of the  
39 concept of drug-related problems : outcomes as the focus of the new  
40 paradigm Evolución del concepto de problemas relacionados con  
41 medicamentos : resultados como el centro del nuevo paradigma.  
42 Seguimiento Farmacoterapeutico 2005;**3**(4):167-88
- 43 2. Rozich J, Resar R. Medication Safety : One Organisation' s Approach.  
44 Journal of Clinical Outcomes Management 2001;**8**(10):27-34
- 45 3. Ruths S, Viktil K, Blix H. Classification of drug-related problems. he Journal  
46 of the Norwegian Medical Association 2007;**127**:3073-76
- 47 4. Wester K, Jönsson A, Spigset O, et al. Incidence of fatal adverse drug  
48 reactions: a population based study. British journal of clinical  
49 pharmacology 2008;**65**(4):573-79
- 50 5. State of the Nation. 2012 ed. UK: Diabetes UK, 2012.
- 51 6. World Health Organisation. New data highlight increases in hypertension,  
52 diabetes incidence, 2012.
- 53 7. Gordon K, Smith F, Dhillon S. Effective chronic disease management:  
54 Patients' perspectives on medication-related problems. Patient Educ  
55 Couns 2007;**65**(3):407-15  
56  
57  
58  
59  
60



- 1
- 2
- 3 8. Schainberg A, Ribeiro-Oliveira A, Ribeiro J. Is there a link between glucose
- 4 levels and heart failure? An update. *Arq Bras Endocrinol Metab*
- 5 2004;**54**(5):488-97
- 6
- 7 9. Milicevic Z, Raz I, Beattie S, et al. Natural History of Cardiovascular
- 8 Disease in Patients With Diabetes Role of hyperglycemia. *Diabetes*
- 9 *Care* 2008;**31**(S2):S155-60
- 10
- 11 10. Brenson R, Britten N. Patients' decisions about whether or not to take
- 12 antihypertensive drugs: qualitative study. *BMJ* 2002;**325**:873-77
- 13
- 14 11. Daly J, Denaro C, Emmerton L. Exploring beliefs about heart failure
- 15 treatment in adherent and nonadherent patients: use of the repertory
- 16 grid technique. *Patient Prefer Adherence* 2013;**7**:141-50 doi:
- 17 10.3122/jabfm.2009.03.080114 Attitudes[published Online First:
- 18 Epub Date]].
- 19
- 20 12. Huri H, Wee H. Drug related problems in type 2 diabetes patients with
- 21 hypertension: A cross-sectional retrospective study. *BMC Endocrine*
- 22 *Disorders* 2013;**13**(1):2-14
- 23
- 24 13. Claydon-Platt K, Manias E, Dunning T. Medication-related problems
- 25 occurring in people with diabetes during an admission to an adult
- 26 teaching hospital: a retrospective cohort study. *Diabetes research and*
- 27 *clinical practice* 2012;**97**(2):223-30
- 28
- 29 14. Haugbolle LS, Sorensen EW. Drug-related problems in patients with
- 30 angina pectoris, type 2 diabetes and asthma--interviewing patients at
- 31 home. *Pharmacy world & science : PWS* 2006;**28**(4):239-47 doi:
- 32 10.1007/s11096-006-9023-9[published Online First: Epub Date]].
- 33
- 34 15. Al Hamid A, Ghaleb M, Aljadhey H, et al. A systematic review of
- 35 hospitalisation resulting from medicine related problems in adult
- 36 patients. *British journal of clinical pharmacology* 2013 doi: doi:
- 37 10.1111/bcp.12293[published Online First: Epub Date]].
- 38
- 39 16. Dixon-Woods M, Bonas S, Booth A, et al. How can systematic reviews
- 40 incorporate qualitative research? A critical perspective. *Qualitative*
- 41 *Research* 2006;**6**(1):27-34
- 42
- 43 17. Lucas P, Baird J, Arai L, et al. Worked examples of alternative methods
- 44 for the synthesis of qualitative and quantitative research in systematic
- 45 reviews. *BMC Med Res Methodol* 2007;**7**(1):4
- 46
- 47 18. Kruper A, Lingard L, Levinson W. Critically appraising qualitative research.
- 48 *BMJ* 2008;**337**:a1035
- 49
- 50 19. Programme CAS. 10 questions to help you make sense of qualitative
- 51 research. 2013.
- 52 [http://media.wix.com/ugd/dded87\\_951541699e9edc71ce66c9bac4734](http://media.wix.com/ugd/dded87_951541699e9edc71ce66c9bac4734c69.pdf)
- 53 [c69.pdf](http://media.wix.com/ugd/dded87_951541699e9edc71ce66c9bac4734c69.pdf) (accessed 24-05-2014).
- 54
- 55 20. Cottrell WN, Denaro CP, Emmerton L. Exploring beliefs about heart failure
- 56 treatment in adherent and nonadherent patients: use of the repertory
- 57 grid technique. *Patient Prefer Adherence* 2013;**7**:141-50 doi:
- 58 10.2147/PPA.S40725[published Online First: Epub Date]].
- 59
- 60 21. Péres D, dos Santos M, Zanetti M, et al. DIFFICULTIES OF DIABETIC
- PATIENTS IN THE ILLNESS CONTROL: FEELINGS AND
- BEHAVIORS. *Rev Latino-am Enfermagem* 2007;**15**(6):1105-12
22. Kiawi E, Edwards R, Shu J, et al. Knowledge, Attitudes, And Behavior
- Relating To Diabetes And Its Main Risk Factors Among Urban



- Residents In Cameroon: A Qualitative Survey. *Ethnicity and disease* 2006;**16**:503-09
23. Jolles EP, Padwal RS, Clark AM, et al. A Qualitative Study of Patient Perspectives about Hypertension. *ISRN Hypertension* 2013;**2013**:1-10 doi: 10.5402/2013/671691[published Online First: Epub Date]].
24. Vinter-Repalust N, Petrièek G, Katiaë M. Obstacles which Patients with Type 2 Diabetes Meet while Adhering to the Therapeutic Regimen in Everyday Life: Qualitative Study. *Croatia Medical Journal* 2004;**45**(5):630-36
25. Smith S, O'Leary M, Bury G, et al. qualitative investigation of the views and health beliefs of patients with Type 2 diabetes following the introduction of a diabetes shared care service. *Diabet Med* 2003;**20**:853-7
26. Al-Qazaz HK, Hassali MA, Shafie AA, et al. Perception and knowledge of patients with type 2 diabetes in Malaysia about their disease and medication: a qualitative study. *Research in social & administrative pharmacy : RSAP* 2011;**7**(2):180-91 doi: 10.1016/j.sapharm.2010.04.005[published Online First: Epub Date]].
27. Mohd Ali S, Jusoff D. Barriers to Optimal Control of Type 2 Diabetes in Malaysian Malay Patients. *Global Journal of Health Science* 2009;**1**(2):106-18
28. Mshunqane N, Stewart AV, Rothberg AD. Type 2 diabetes management: Patient knowledge and health care team perceptions, South Africa. *African Journal of Primary Health Care & Family Medicine* 2012;**4**(1) doi: 10.4102/phcfm.v4i1.392[published Online First: Epub Date]].
29. Gascón J, Sánchez-Ortuño M, Llor B, et al. Why hypertensive patients do not comply with the treatment. *Family Practice* 2004;**21**(2):125-30
30. Lai WA, Lew-Ting CY, Chie WC. How diabetic patients think about and manage their illness in Taiwan. *Diabet Med* 2005;**22**(3):286-92 doi: 10.1111/j.1464-5491.2004.01406.x[published Online First: Epub Date]].
31. Brown KA, M Hubbard, M. Health beliefs of African–Caribbean people with type 2 diabetes: a qualitative study. *British Journal of Clinical Practice* 2007;**57**:461-70
32. Choudhury SM, Brophy S, Williams R. Understanding and beliefs of diabetes in the UK Bangladeshi population. *Diabet Med* 2009;**26**(6):636-40 doi: 10.1111/j.1464-5491.2009.02741.x[published Online First: Epub Date]].
33. Grace C, Begum R, Subhani S, et al. Prevention of type 2 diabetes in British Bangladeshis: qualitative study of community, religious, and professional perspectives. *BMJ* 2008;**337**:a1931 doi: 10.1136/bmj.a1931[published Online First: Epub Date]].
34. Heymann A, Valinsky L, Inbar Z, et al. Perceptions of hypertension treatment among patients with and without diabetes. *BMC family practice* 2012;**13**:24-30 doi: 10.1186/1471-2296-13-24[published Online First: Epub Date]].
35. Lawton J, Ahmad N, Hanna L, et al. 'I can't do any serious exercise': barriers to physical activity amongst people of Pakistani and Indian origin with Type 2 diabetes. *Health education research* 2006;**21**(1):43-54 doi: 10.1093/her/cyh042[published Online First: Epub Date]].

- 1  
2  
3 36. Peel E, Parry O, Douglas M, et al. Diagnosis of type 2 diabetes: a  
4 qualitative analysis of patients' emotional reactions and views about  
5 information provision. *Patient Educ Couns* 2004;**53**(3):269-75 doi:  
6 10.1016/j.pec.2003.07.010[published Online First: Epub Date]].  
7  
8 37. Coronado G, Thompson B, Tejada S, et al. Attitudes and Beliefs Among  
9 Mexican Americans About Type 2 Diabetes. *Journal of Health Care for*  
10 *the Poor and Underserved* 2004;**15**(4):576-88  
11  
12 38. Hu J, Amirehsani K, Wallace DC, et al. Perceptions of barriers in  
13 managing diabetes: perspectives of Hispanic immigrant patients and  
14 family members. *The Diabetes educator* 2013;**39**(4):494-503 doi:  
15 10.1177/0145721713486200[published Online First: Epub Date]].  
16  
17 39. Rustveld L, Pavlik V, Jibaja-Weiss M, et al. Adherence to diabetes self-  
18 care behaviors  
19 in english- and spanish-speaking hispanic men. *Patient Preference and*  
20 *Adherence* 2009;**3**:123-30  
21  
22 40. Lawton J, Ahmad N, Hanna L, et al. I can't do any serious exercise':  
23 barriers to physical activity amongst people of Pakistani and Indian  
24 origin with Type 2 diabetes. *Health Education and Practice*  
25 2006;**21**(1):12  
26  
27 41. Coronado GD, Thompson B, Tejada S, et al. Attitudes and Beliefs Among  
28 Mexican Americans About Type 2 Diabetes. *Journal of Health Care for*  
29 *the Poor and Underserved* 2004;**15**(4):576-88 doi:  
30 10.1353/hpu.2004.0057[published Online First: Epub Date]].  
31  
32 42. Alhomoud F, Dhillon S, Aslanpour Z, et al. Medicine use and medicine-  
33 related problems experienced by ethnic minority patients in the United  
34 Kingdom: A review. *Int J Pharm Pract* 2013;**21**(5):277-78  
35  
36 43. Peeters E, Parry O, Douglas M, et al. Diagnosis of type 2 diabetes: a  
37 qualitative analysis of patients' emotional reactions and views about  
38 information provision. *Patient Educ Couns* 2004;**53**:269-75  
39  
40 44. Jin J, Sklar G, Oh V, et al. Factors affecting therapeutic compliance: A  
41 review from the patient's perspective. *Therapeutics and Clinical Risk*  
42 *Management* 2008;**4**(1):269-76  
43  
44 45. Vermeire E, Hearnshaw H, Van Royan P, et al. Patient adherence to  
45 treatment: three decades of research. A comprehensive review.  
46 *Journal of clinical pharmacy and therapeutics* 2001;**26**(5):331-42  
47  
48 46. Thomas J, Harden A. Methods for the thematic synthesis of qualitative  
49 research in systematic reviews. *BMC Med Res Methodol* 2008;**8**(1):45-  
50 52  
51  
52  
53  
54  
55  
56  
57  
58  
59  
60

### Figure legend

Figure 1 Data extraction and study selection process.

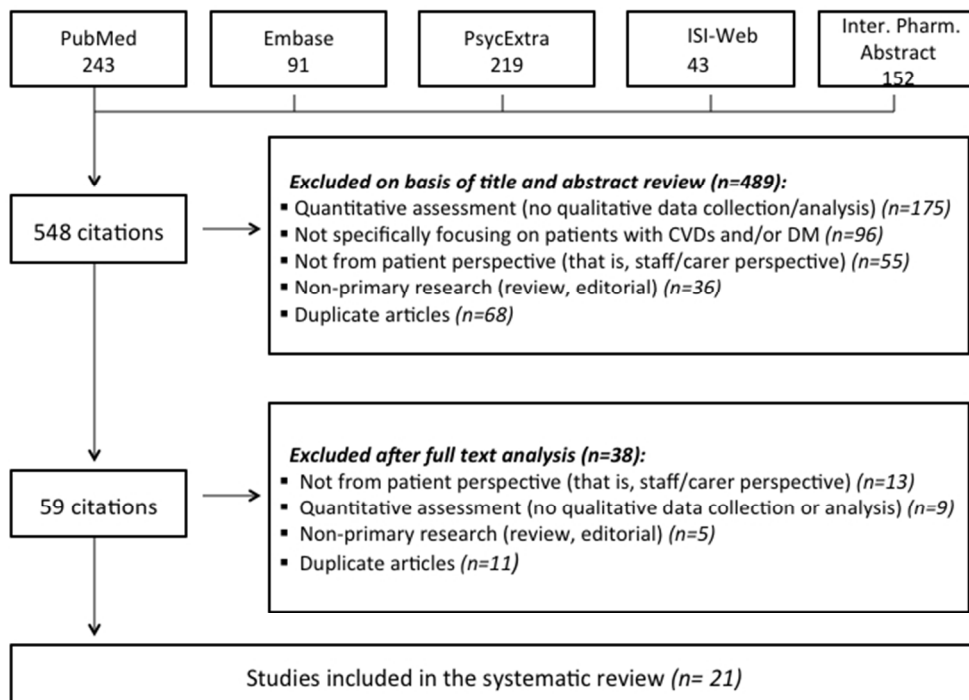

254x190mm (72 x 72 DPI)

Review only

1  
2  
3  
4  
5  
6  
7  
8  
9  
10  
11  
12  
13  
14  
15  
16  
17  
18  
19  
20  
21  
22  
23  
24  
25  
26  
27  
28  
29  
30  
31  
32  
33  
34  
35  
36  
37  
38  
39  
40  
41  
42  
43  
44  
45  
46  
47  
48  
49  
50  
51  
52  
53  
54  
55  
56  
57  
58  
59  
60

# BMJ Open

**A systematic review of qualitative research on the contributory factors leading to medicine-related problems from the perspectives of adult patients with cardiovascular diseases and diabetes mellitus**

|                                 |                                                                                                                                                                                                                                                                            |
|---------------------------------|----------------------------------------------------------------------------------------------------------------------------------------------------------------------------------------------------------------------------------------------------------------------------|
| Journal:                        | <i>BMJ Open</i>                                                                                                                                                                                                                                                            |
| Manuscript ID:                  | bmjopen-2014-005992.R1                                                                                                                                                                                                                                                     |
| Article Type:                   | Research                                                                                                                                                                                                                                                                   |
| Date Submitted by the Author:   | 27-Aug-2014                                                                                                                                                                                                                                                                |
| Complete List of Authors:       | Al Hamid, Abdullah; University of Hertfordshire, Pharmacy<br>Ghaleb, Maisoon; University of Hertfordshire, Pharmacy<br>Aljadhey, Hisham; King Saud University, Clinical Pharmacy Department, College of Pharmacy,<br>Aslanpour, Zoe; University of Hertfordshire, Pharmacy |
| <b>Primary Subject Heading</b>: | Qualitative research                                                                                                                                                                                                                                                       |
| Secondary Subject Heading:      | Cardiovascular medicine, Diabetes and endocrinology                                                                                                                                                                                                                        |
| Keywords:                       | QUALITATIVE RESEARCH, DIABETES & ENDOCRINOLOGY, CARDIOLOGY                                                                                                                                                                                                                 |
|                                 |                                                                                                                                                                                                                                                                            |

SCHOLARONE™  
Manuscripts

1  
2  
3 **A systematic review of qualitative research on the**  
4 **contributory factors leading to medicine-related problems**  
5 **from the perspectives of adult patients with cardiovascular**  
6 **diseases and diabetes mellitus**  
7  
8  
9

10 A Al Hamid, *PhD candidate (aalhamid@herts.ac.uk)*<sup>1</sup>, M Ghaleb, *Senior*  
11 *lecturer in pharmacy practice/patient safety*<sup>1</sup>, H Aljadhey, *Assistant professor*  
12 *in clinical pharmacy*<sup>2</sup> and Z Aslanpour, *Head of pharmacy and public health*  
13 *practice*<sup>1</sup>  
14  
15

16  
17 Authors Affiliations  
18

19 <sup>1</sup> *Department of Pharmacy, School of Life and Medical Sciences, University of*  
20 *Hertfordshire, Hatfield, AL10 9AB, UK.*

21 <sup>2</sup> *Medication Safety Research Chair, Clinical Pharmacy Department, College*  
22 *of Pharmacy, King Saud University, Riyadh, P.O. Box 2457, Saudi Arabia.*  
23  
24  
25

26 Correspondence to:

27 Mr A M Al Hamid  
28 Department of Pharmacy  
29 University of Hertfordshire  
30 College Lane Campus  
31 Hatfield, Herts  
32 AL10 9AB (UK)  
33 Telephone: +44 (0)1707-287242  
34 Fax: +44 (0)1707-285406  
35 Email: a.alhamid@herts.ac.uk  
36  
37

38  
39 *Keywords: Medicine-related problems, patients' perspectives, risk factors,*  
40 *cardiovascular diseases, and diabetes mellitus.*  
41

42 *Word Count: 3995*  
43

44 *Number of figures and tables: one figure and two tables*  
45

46 *Conflict of interest: The authors declare no conflict of interest*  
47

48  
49 *Disclaimer: I confirm that the views expressed in the submitted article are my*  
50 *own and not an official position of the institution or funder.*  
51

52 *We have read and understood BMJ policy on declaration of interests and*  
53 *declare the following interests: None*  
54  
55  
56  
57  
58  
59  
60

## ABSTRACT

**Objectives** To synthesise contributing factors leading to medicine-related problems (MRPs) in adult patients with cardiovascular diseases and/or diabetes mellitus from their perspectives.

**Design** A systematic literature review of qualitative studies regarding the contributory factors leading to MRPs, medication errors, and non-adherence, followed by a thematic synthesis of the studies.

**Data sources** We screened Pubmed, Embase, ISI Web of Knowledge, PsycInfo, International Pharmaceutical Abstract, and PsycExtra for qualitative studies (Interviews, focus groups, and questionnaires of a qualitative nature).

**Review methods** Thematic synthesis was achieved by coding and developing themes from the findings of qualitative studies.

**Results** The synthesis yielded 21 studies which satisfied the inclusion and exclusion criteria. Three themes emerged that involved contributing factors to MRPs: patient-related factors including both socioeconomic factors (beliefs, feeling victimised, history of the condition, lack of finance, lack of motivation, and low self-esteem) and lifestyle factors (diet, lack of exercise/time to see the doctor, obesity, smoking, and stress), medicine-related factors (belief in natural remedies, fear of medicine, lack of belief in medicines, lack of knowledge, non-adherence, and polypharmacy), and condition-related factors (lack of knowledge/understanding, fear of condition and its complications, and lack of control).

**Conclusions** MRPs represent a major health threat, especially among adult patients with cardiovascular diseases and/or diabetes mellitus. The patients' perspectives uncovered hidden factors that could cause and/or contribute to MRPs in these groups of patients.

### Article focus

- CVDs and DM represent a major health issue that accounts for more than half of the total death rate worldwide.
- The contribution of patients' beliefs and behaviours towards their medicines /conditions and its subsequent involvement in MRPs is still under-researched.
- An exploration of the contributory factors leading to MRPs in patients with CVDs/DM could help inform prospective interventions.

### Key messages

- MRPs constitute a major health concern especially for adult patients with CVDs and/or DM.
- Whereas medicine-related factors play important role in the incidence of MRPs; other contributing factors can be involved and include: Patient-related, life-style and clinical-related factors.
- Identifying the contributory factors leading to MRPs could help in mitigating/preventing incidence of MRPs. Thus, data from qualitative studies must be integrated with those of quantitative nature to develop efficient and practical interventions.

### Strengths and limitations of the study

- To our knowledge, it is the first systematic review conducted on qualitative research regarding the contributory factors leading to medicine-related problems from the perspectives of adult patients with cardiovascular diseases and diabetes mellitus.
  - The study undertook a comprehensive systematic review with thematic synthesis approach .
  - Despite using studies from 12 countries, the analytical themes developed from the review comprised a high level of conceptual thinking which could be applied across different studies.
  - The review was restricted to the experiences of patients with 12 countries which could limit the generalisability of the findings.
  - The qualitative studies (n = 21) in the literature were limited, so further qualitative studies are needed to assess the contributory factors leading to medicine-related problems.

1  
2  
3  
4  
5  
6  
7  
8  
9  
10  
11  
12  
13  
14  
15  
16  
17  
18  
19  
20  
21  
22  
23  
24  
25  
26  
27  
28  
29  
30  
31  
32  
33  
34  
35  
36  
37  
38  
39  
40  
41  
42  
43  
44  
45  
46  
47  
48  
49  
50  
51  
52  
53  
54  
55  
56  
57  
58  
59  
60

For peer review only



## INTRODUCTION

Medicine-related problems (MRPs) emerged as a concept in the early 1990s as “the detrimental experience regarding drug therapy and which potentially or actually causes an interference with their desired outcome.”[1] MRPs affect both healthcare and economic situations and contribute to a tremendous increase in morbidity, mortality and healthcare expenditure worldwide.[2-4]

MRPs represent a major issue, particularly in chronic conditions such as cardiovascular diseases (CVDs) and diabetes mellitus (DM).[5] The aforementioned conditions are expected to be the major source of morbidity by 2020.[6 7] In addition, these two conditions are interrelated; it has been documented that DM is a key factor that leads to CVDs as people with diabetes are three to four times more likely to have a CVD.[8 9] Consequently, the combination of CVDs and DM, which can result in multiple complications, represents a major concern for healthcare professionals.

More specifically, patients with CVDs and/or DM are more susceptible to MRPs due to long-term use of medicines and the inevitable polypharmacy.[7 10 11] However, many additional factors that contribute to MRPs in patients with CVDs and/or DM have gone underreported.

Studies in the literature, which investigated risk factors contributing to MRPs in patients with CVDs/DM, were mainly quantitative; only few studies were qualitative. Quantitative studies investigating risk factors contributing to MRPs involved either direct observations or were made retrospectively using data extracted from medical records.[12-15] However, most of the studies reported old age and polypharmacy extensively; few studies reported gender, depression, education, cohabitation, and immobilisations.[16] Nonetheless, qualitative studies investigating contributory risk factors leading to MRPs have been rather limited.

1  
2  
3 Therefore, this review aims to explore and evaluate contributory factors  
4 leading to MRPs among adult patients with CVDs and/or DM from their  
5 perspectives.  
6  
7

## 8 9 **METHODS**

10 We searched the PubMed, Embase, ISI Web of Knowledge, PsycInfo,  
11 International Pharmaceutical Abstract, and PsycExtra databases for entries  
12 between January 1990 and March 2014. The search strategy evaluated  
13 articles obtained predominantly through databases. Additional articles were  
14 retrieved through the bibliography lists of published reviews, where applicable.  
15  
16  
17

18 The search strategy combined established methodological terms for  
19 qualitative research (qualitative research, qualitative studies, nursing  
20 methodological research, narrative analysis) and the following terms:  
21 Medicine (drug/medication) related problems, medicine (drug/medication) use,  
22 diabetes mellitus, cardiovascular diseases, patients' perspectives, patients'  
23 beliefs, patients' attitudes, patients' views, patients' opinions, patients'  
24 knowledge, patients' behaviours, and contributory factors. In addition, Medical  
25 Subject Headings (MeSH) relating to MRPs, CVDs/DM, risk factors, and  
26 patients' perspectives were explored.  
27  
28  
29  
30  
31  
32  
33  
34  
35  
36  
37

### 38 **Study selection**

39 We included studies that utilised phone interviews, face-to-face interviews,  
40 focus groups, and open-ended questionnaires that were published in peer-  
41 reviewed journals.  
42  
43

44 The inclusion criteria involved studies focusing on the patients' perspectives  
45 on the use of medicines and MRPs and were conducted on adult patients with  
46 CVDs and/or DM.  
47  
48

49 On the other hand, the exclusion criteria flagged studies that were quantitative  
50 in nature, studies with closed-ended questionnaires, and studies focusing on  
51 conditions other than CVD/DM.  
52  
53

54 Initially, one reviewer (AA) conducted the search and did screening for the  
55 titles. At this stage, studies with irrelevant titles were excluded. Then, the  
56  
57  
58  
59  
60

1  
2  
3 abstracts of the remaining studies were evaluated independently for inclusion  
4 by two reviewers (MG and ZA). Any disagreements that were encountered  
5 were resolved via a discussion. No language limits were applied. However,  
6 the search results only generated English studies. Figure 1 demonstrate the  
7 details of the data extraction process.  
8  
9  
10

### 11 12 13 **Data synthesis and analysis**

14 In order to extract data from articles, we adopted the systematic review  
15 approach for qualitative research by Dixon-Woods et al.[17] This allowed the  
16 emergence of broad concepts. Then, data was synthesised by utilising the  
17 thematic analysis approach,[18] which enables extraction of concepts and  
18 hypotheses from multiple qualitative studies.  
19  
20  
21  
22  
23

24 Based on the extracted results, we developed textual summaries and tables.  
25 From the textual summaries and tables, we identified emerging themes which  
26 described the meaning and content of the included studies. We then  
27 inspected similarities and differences across the textual summaries in order to  
28 avoid contradiction and reduce the developed number of themes.  
29 Subsequently, we agreed on the final list of themes through discussion and  
30 consensus.  
31  
32  
33  
34  
35  
36  
37

38 Finally, we coded the full list of papers for the presence or absence of themes.  
39 The codes were tabulated afterwards by country in order to inspect similarities  
40 and differences across countries.  
41  
42  
43  
44

45 Since our approach was qualitative, the presence of a theme in more than  
46 one paper did not indicate its importance in the studied population.[19]  
47 However, a theme appearing in more than one paper did denote to a degree  
48 its validity. Thus, the number of studies within a specific theme was reported  
49 in this review.  
50  
51  
52  
53  
54

### 55 **Quality of synthesis assessment**

56 The quality of papers was assessed using the checklist developed by Dixon-  
57 Woods et al. (2004).[17] This assessment was based mainly on clarity,  
58  
59  
60

1  
2  
3 consideration of ethical issues, and transferability of the sample, data, and  
4 analysis across different settings. Furthermore, the critical appraisal skills  
5 programme criteria[20] were used to rank the papers based on 10 questions  
6 that fulfilled the clarity, methods, and results of the studies. Consequently,  
7 studies were grouped into low (one star: 0 to 3 points), medium (two stars: 4  
8 to 7 points), and high quality (three stars: 8 to 10 points). Low-quality studies  
9 were not excluded, but caution was taken when interpreting their results.  
10  
11  
12  
13  
14  
15  
16  
17  
18  
19  
20  
21  
22  
23  
24  
25  
26  
27  
28  
29  
30  
31  
32  
33  
34  
35  
36  
37  
38  
39  
40  
41  
42  
43  
44  
45  
46  
47  
48  
49  
50  
51  
52  
53  
54  
55  
56  
57  
58  
59  
60

1  
2  
3  
4  
5  
6  
7  
8  
9  
10  
11  
12  
13  
14  
15  
16  
17  
18  
19  
20  
21  
22  
23  
24  
25  
26  
27  
28  
29  
30  
31  
32  
33  
34  
35  
36  
37  
38  
39  
40  
41  
42  
43  
44  
45  
46  
47  
48  
49

**RESULTS**

A total of 21 studies (including 836 participants) from 12 countries met the inclusion criteria (Table 1) and were conducted in the following countries: Australia,[21] Brazil,[22] Cameroon,[23] Canada,[24] Croatia,[25] Ireland,[26] Malaysia,[27 28] South Africa,[29] Spain,[30] Taiwan,[31] the United Kingdom,[7 32-37] and the United States.[38-40] The majority of the studies investigated type 2 DM (*n* = 15); fewer studies investigated CVDs. Thus, only two studies investigated hypertension (HTN), one investigated heart failure, and one studied CVDs in general. The remaining two studies investigated DM/HTN and DM/HTN/stroke, respectively. Eight studies used focus groups, 12 used interviews, and one study used a mixture of these methods. The review covered areas related to patients, conditions, and medicines.

Table 1| **Characteristics of the included studies**

| Study                   | Country  | Study type                 | Patients' diagnosis | Method of analysis | Study population                                                                                 | Study settings                                | Study aims                                                                                                                                                     | Study quality |
|-------------------------|----------|----------------------------|---------------------|--------------------|--------------------------------------------------------------------------------------------------|-----------------------------------------------|----------------------------------------------------------------------------------------------------------------------------------------------------------------|---------------|
| Al-Qazaz et al 2011[27] | Malaysia | Semi-structured interviews | Type 2 DM           | Content analysis   | 12 diabetic patients, with at least one year of diabetes and a prescription of oral hypoglycemic | Universiti Sains Malaysia (USM) Health Clinic | To explore diabetic patients' experience and knowledge about diabetes and its medication and to understand the factors contributing to medication adherence in | **            |

1  
2  
3  
4  
5  
6  
7  
8  
9  
10  
11  
12  
13  
14  
15  
16  
17  
18  
19  
20  
21  
22  
23  
24  
25  
26  
27  
28  
29  
30  
31  
32  
33  
34  
35  
36  
37  
38  
39  
40  
41  
42  
43  
44  
45  
46  
47  
48  
49

Malaysian population.

|                          |    |                       |           |                   |                                                                                                                                                                                                              |                                                                                              |                                                                                                                               |     |
|--------------------------|----|-----------------------|-----------|-------------------|--------------------------------------------------------------------------------------------------------------------------------------------------------------------------------------------------------------|----------------------------------------------------------------------------------------------|-------------------------------------------------------------------------------------------------------------------------------|-----|
| Brown et al 2007[32]     | UK | One-to-one interviews | Type 2 DM | Thematic analysis | 17 African–Caribbean diabetes patients with age above 18 years; 13 first generation immigrants and four second generation immigrants                                                                         | Inner city Nottingham                                                                        | To gain an understanding of how health beliefs influence the way African–Caribbean people with diabetes manage their illness. | *** |
| Choudhury et al 2009[33] | UK | Structured interview  | Type 2 DM | Thematic analysis | 14 invited individuals, Bangladeshi (four males and 10 females), in the age range of 26 to 67 years, with type 2 DM (had it since six months - 27 years) and were recruited either in Swansea or Birmingham. | Participants from local communities in Swansea and Birmingham were invited for the interview | To examine the understanding and beliefs of people with diabetes from the Bangladeshi community living in the UK.             | **  |

1  
2  
3  
4  
5  
6  
7  
8  
9  
10  
11  
12  
13  
14  
15  
16  
17  
18  
19  
20  
21  
22  
23  
24  
25  
26  
27  
28  
29  
30  
31  
32  
33  
34  
35  
36  
37  
38  
39  
40  
41  
42  
43  
44  
45  
46  
47  
48  
49

---

|                         |           |                      |           |                                       |                                                                                                                                                 |                                                                                                                                                                   |                                                                                                                                                                              |   |
|-------------------------|-----------|----------------------|-----------|---------------------------------------|-------------------------------------------------------------------------------------------------------------------------------------------------|-------------------------------------------------------------------------------------------------------------------------------------------------------------------|------------------------------------------------------------------------------------------------------------------------------------------------------------------------------|---|
|                         |           |                      |           |                                       | Interviews were made in either English or in Sylheti as the researcher was bilingual                                                            |                                                                                                                                                                   |                                                                                                                                                                              |   |
| Coronado et al 2004[38] | USA       | Focus groups         | Type 2 DM | Matrix analysis by Morgan and Krueger | 42 Individuals (14 men and 28 women) in six focus groups, who had diabetes, had a family history of diabetes, or knew someone who had diabetes. | Fred Hutchinson Cancer Research Center's project office in Sunnyside, Yakima village and Skagit Valley Community College and at the Catholic church in Burlington | To investigate the perceptions about the causes of and treatments for type 2 DM                                                                                              | * |
| Cottrell et al 2013[21] | Australia | Structured interview | HF        | Repertory grid technique              | 92 patients (older than 18 years) with heart failure                                                                                            | Heart Failure Service outpatient clinic, Royal Brisbane and Women's Hospital in Brisbane, Australia                                                               | To elicit individuals' beliefs about their heart failure treatment and to investigate whether generated constructs were different between adherent and nonadherent patients. | * |

---

|                                                                                                                                                 |                       |       |                                        |     |                   |                                                                                                                                                                                                                                                                           |                                                                                                                        |                                                                                                                                                                          |    |
|-------------------------------------------------------------------------------------------------------------------------------------------------|-----------------------|-------|----------------------------------------|-----|-------------------|---------------------------------------------------------------------------------------------------------------------------------------------------------------------------------------------------------------------------------------------------------------------------|------------------------------------------------------------------------------------------------------------------------|--------------------------------------------------------------------------------------------------------------------------------------------------------------------------|----|
| 1<br>2<br>3<br>4<br>5<br>6<br>7<br>8<br>9<br>10<br>11<br>12<br>13<br>14<br>15<br>16<br>17<br>18<br>19<br>20<br>21<br>22<br>23<br>24<br>25<br>26 | Gascon et al 2004[30] | Spain | Focus groups with open ended questions | HTN | Thematic analysis | Seven focus groups of 44 patients (24 men and 20 women), diagnosed with hypertension, between the ages of 18 and 80 years, being treated with antihypertensives for 3 months, being non-compliant and having sufficiently good physical and mental health to participate. | Two primary healthcare centres                                                                                         | To identify factors related to non-compliance with the treatment of patients with hypertension.                                                                          | ** |
| 27<br>28<br>29<br>30<br>31<br>32<br>33<br>34<br>35<br>36<br>37<br>38<br>39<br>40<br>41<br>42<br>43<br>44<br>45<br>46<br>47<br>48<br>49          | Gordon et al 2007[7]  | UK    | Face-to-face interviews                | CVD | Thematic analysis | 98 patients (41 males and 57 females) in the age range of 32 – 89 years.                                                                                                                                                                                                  | Home interviews of patients recruited from five general surgeries and pharmacy interviews at four community pharmacies | To examine medication-related problems from the perspective of patients with a chronic condition and to identify how they may be supported in managing their medication. | ** |



1  
2  
3  
4  
5  
6  
7  
8  
9  
10  
11  
12  
13  
14  
15  
16  
17  
18  
19  
20  
21  
22  
23  
24  
25  
26  
27  
28  
29  
30  
31  
32  
33  
34  
35  
36  
37  
38  
39  
40  
41  
42  
43  
44  
45  
46  
47  
48  
49

|                        |     |              |            |                   |                                                                                                                                                                                                                                               |                                                            |                                                                                                                                                             |     |
|------------------------|-----|--------------|------------|-------------------|-----------------------------------------------------------------------------------------------------------------------------------------------------------------------------------------------------------------------------------------------|------------------------------------------------------------|-------------------------------------------------------------------------------------------------------------------------------------------------------------|-----|
| Grace et al 2008[34]   | UK  | Focus groups | Type 2 DM  | Thematic analysis | 17 focus groups of adult diabetic patients                                                                                                                                                                                                    | Tower Hamlets, a socioeconomically deprived London borough | To understand lay beliefs and attitudes, religious teachings, and professional perceptions in relation to diabetes prevention in the Bangladeshi community. | *** |
| Heymann et al 2012[35] | UK  | Focus groups | DM and HTN | Thematic analysis | 10 focus groups of 86 (42 males and 44 females) patients with hypertension in three age ranges: 41-50, 51-60, 61-70 years (six groups); and patients with hypertension and DM in the age ranges: 51-60, 61-70 years (a total of four groups). | UK                                                         | To explore beliefs and perceptions regarding hypertension and gain an understanding of barriers to treatment among patients with and without DM.            | *** |
| Hu et al 2013[39]      | USA | Focus groups | Type 2 DM  | Content analysis  | Five focus groups of 73 Hispanic immigrants; 18                                                                                                                                                                                               | free health clinic in central North Carolina               | To explore perceived barriers among Hispanic                                                                                                                | **  |

1  
2  
3  
4  
5  
6  
7  
8  
9  
10  
11  
12  
13  
14  
15  
16  
17  
18  
19  
20  
21  
22  
23  
24  
25  
26  
27  
28  
29  
30  
31  
32  
33  
34  
35  
36  
37  
38  
39  
40  
41  
42  
43  
44  
45  
46  
47  
48  
49

|                       |          |                                      |                           |                   |                                                                                                                                                                                                                   |                                                                                      |                                                                                                                                 |     |
|-----------------------|----------|--------------------------------------|---------------------------|-------------------|-------------------------------------------------------------------------------------------------------------------------------------------------------------------------------------------------------------------|--------------------------------------------------------------------------------------|---------------------------------------------------------------------------------------------------------------------------------|-----|
|                       |          |                                      |                           |                   | years or older                                                                                                                                                                                                    |                                                                                      | immigrants with diabetes and their family members.                                                                              |     |
| Jolles et al 2013[24] | Canada   | Semi-structured interviews           | HTN                       | Thematic analysis | 26 Patients, in the age range of 26 - 85 years and 62% females, able to speak, read and write English; diagnosed with hypertension by a healthcare provider, and currently taking an antihypertensive medication. | Two hypertension clinics at the University of Alberta in Edmonton                    | To understand hypertensive patients' perspectives regarding blood pressure and hypertension treatment.                          | **  |
| Kiawi et al 2006[23]  | Cameroon | In-depth interviews, semi-structured | Type 2 DM, HTN and stroke | Content analysis  | 15 interviews of 62 patients (27 women and five men), selection criteria included they had lived at least six months in the community, were nominated by other                                                    | Four urban health districts, one from each of the main ecological areas of Cameroon. | To investigate of lay knowledge, attitudes, and behaviors relating to diabetes and its main risk factors of urban Cameroonians. | *** |

1  
2  
3  
4  
5  
6  
7  
8  
9  
10  
11  
12  
13  
14  
15  
16  
17  
18  
19  
20  
21  
22  
23  
24  
25  
26  
27  
28  
29  
30  
31  
32  
33  
34  
35  
36  
37  
38  
39  
40  
41  
42  
43  
44  
45  
46  
47  
48  
49

community members, and were age above 15 years.

|                              |          |                                              |           |                   |                                                                                                                                   |                                                             |                                                                                                                                                                      |     |
|------------------------------|----------|----------------------------------------------|-----------|-------------------|-----------------------------------------------------------------------------------------------------------------------------------|-------------------------------------------------------------|----------------------------------------------------------------------------------------------------------------------------------------------------------------------|-----|
| Lai et al 2005[31]           | Taiwan   | In-depth interviews                          | Type 2 DM | Thematic analysis | 22 diabetic patients (12 males and 10 females), in the age range of 44 - 80 years, with a duration of illness more than one year. | Rural Taiwan community                                      | To investigate Chinese diabetic patients' perceptions about their illness and treatment strategies to facilitate patient-centred, culture-sensitive clinical skills. | **  |
| Lawton et al. 2006[36]       | UK       | In-depth interviews with open-ended approach | Type 2 DM | Thematic analysis | 31 patients (23 Pakistani and eight Indian), aged 18 years and over, and diagnosed with type 2 DM                                 | General Practices in Edinburgh                              | Patients' perception and practical considerations                                                                                                                    | **  |
| Mohd Ali and Jusoff 2009[28] | Malaysia | In-depth open-ended interviews               | Type 2 DM | Thematic analysis | 18 patients (9 males and 9 females) in the age of 15-75 years, and 13 healthcare professionals (nine doctors, three               | Endocrinology clinic of a teaching hospital in Kuala Lumpur | To explore the perspectives and experiences of Malay patients in managing type 2 DM as a chronic illness and provide                                                 | *** |

1  
2  
3  
4  
5  
6  
7  
8  
9  
10  
11  
12  
13  
14  
15  
16  
17  
18  
19  
20  
21  
22  
23  
24  
25  
26  
27  
28  
29  
30  
31  
32  
33  
34  
35  
36  
37  
38  
39  
40  
41  
42  
43  
44  
45  
46  
47  
48  
49

|                          |              |                                                                                                                                       |           |                   |                                                                                                                     |                                                         |                                                                                                                                                                                              |     |
|--------------------------|--------------|---------------------------------------------------------------------------------------------------------------------------------------|-----------|-------------------|---------------------------------------------------------------------------------------------------------------------|---------------------------------------------------------|----------------------------------------------------------------------------------------------------------------------------------------------------------------------------------------------|-----|
|                          |              |                                                                                                                                       |           |                   | pharmacists and one diabetic nurse educator).                                                                       |                                                         | recommendations that aim to enhance adherence to treatment and help patients to improve their self-management skills.                                                                        |     |
| Mshunqane et al 2012[29] | South Africa | Patient focus groups (n = 10) and healthcare professional focus groups (n = 8) and in-depth interviews. The questions were open-ended | Type 2 DM | Thematic analysis | Patients who had been diagnosed with type 2 diabetes for at least one year, who were between 30 and 65 years of age | Dr George Mukhari Hospital outpatients' diabetes clinic | To determine the knowledge that patients with type 2 DM have about the management of their disease, as well as the perceptions of the health care team about the services given to patients. | *** |
| Peel et al 2004[37]      | UK           | In-depth interviews                                                                                                                   | Type 2 DM | Thematic analysis | 40 newly diagnosed TYPE 2 DIABETES MELLITUS patients in the age range of 21 – 77 years                              | Across the Lothian region in Scotland                   | To explore the patients' emotional reactions about their type 2 DM diagnosis, and their views about information provision at the time of                                                     | **  |

1  
2  
3  
4  
5  
6  
7  
8  
9  
10  
11  
12  
13  
14  
15  
16  
17  
18  
19  
20  
21  
22  
23  
24  
25  
26  
27  
28  
29  
30  
31  
32  
33  
34  
35  
36  
37  
38  
39  
40  
41  
42  
43  
44  
45  
46  
47  
48  
49

diagnosis.

|                         |         |              |           |                   |                                                                                                                                                       |                                                                                         |                                                                                                                                        |    |
|-------------------------|---------|--------------|-----------|-------------------|-------------------------------------------------------------------------------------------------------------------------------------------------------|-----------------------------------------------------------------------------------------|----------------------------------------------------------------------------------------------------------------------------------------|----|
| Peres et al 2007[22]    | Brazil  | Interviews   | Type 2 DM | Content analysis  | 24 diabetic females, age between 25 and 76 years old, literate, with eight years of schooling, from Ribeirão Preto, who perform household activities. | Nursing Education Center for Adults and Elderly - CEEAI, University of São Paulo        | Identify the difficulties patients encounter when controlling diabetes                                                                 | ** |
| Rustveld et al 2009[40] | USA     | Focus groups | Type 2 DM | Thematic analysis | 34 patients in six focus groups (three in English and three in Spanish), older than 18 years and with type 2 DM                                       | Three Harris County Hospital District (HCHD) community health centers in Houston, Texas | To elicit attitudes, attributions, and self-efficacy related to diabetes self-care in both English- and Spanish-speaking Hispanic men. | ** |
| Smith et al 2003[26]    | Ireland | Focus groups | Type 2 DM | Thematic analysis | 25 patients from three general practices, having DM for at least one year                                                                             | Patients were invited to participate in the focus group                                 | To explore the views and health beliefs of patients with type 2 DM who had experienced                                                 | ** |

a new structured diabetes shared care service.

|                                |         |              |           |                   |                                                                                                                                                                                                                                                         |                       |                                                                                                                                                                                                                              |     |
|--------------------------------|---------|--------------|-----------|-------------------|---------------------------------------------------------------------------------------------------------------------------------------------------------------------------------------------------------------------------------------------------------|-----------------------|------------------------------------------------------------------------------------------------------------------------------------------------------------------------------------------------------------------------------|-----|
| Vinter-Repalust et al 2004[25] | Croatia | Focus groups | Type 2 DM | Thematic analysis | Seven focus groups of 49 patients (22 males and 27 females), in the age range of 44 - 83 years, ambulatory patients with the diagnosis of type 2 DM, with differences not only in age and sex, but also in the method of treatment of diabetes as well. | Zagreb Medical School | To explore type 2 diabetic patients' attitudes, thoughts, and fears connected with their illness; their expectations of the health care system; and the problems they encountered while adhering to the therapeutic regimen. | *** |
|--------------------------------|---------|--------------|-----------|-------------------|---------------------------------------------------------------------------------------------------------------------------------------------------------------------------------------------------------------------------------------------------------|-----------------------|------------------------------------------------------------------------------------------------------------------------------------------------------------------------------------------------------------------------------|-----|

## Narrative synthesis

The main findings of the review showed that contributory factors to MRPs involved three themes: patient-related (socioeconomic and lifestyle), medicine-related, and condition-related factors. Table 2 lists the studies that reported or discussed each theme.

| Theme/ Sub-theme                                      | Countries, studies                                                                                                                                                                                                                                                                                                                                                                                                                                     |
|-------------------------------------------------------|--------------------------------------------------------------------------------------------------------------------------------------------------------------------------------------------------------------------------------------------------------------------------------------------------------------------------------------------------------------------------------------------------------------------------------------------------------|
| <b><i>Patient related factors (socioeconomic)</i></b> |                                                                                                                                                                                                                                                                                                                                                                                                                                                        |
| Belief                                                | UK (Brown et al 2007[32], Grace et al 2008[34], Lawton et al 2006[36])                                                                                                                                                                                                                                                                                                                                                                                 |
| Family history of condition                           | UK (Grace et al 2008[34], Lawton et al 2006[36]), USA (Coronado et al 2004[38])                                                                                                                                                                                                                                                                                                                                                                        |
| Feeling victimised                                    | South Africa (Mshunqane et al 2012[29]), Croatia (Vinter-Repalust et al 2004[25]), Ireland (Smith et al 2002[26])                                                                                                                                                                                                                                                                                                                                      |
| Lack of finance                                       | Ireland (Smith et al 2002[26]), South Africa (Mshunqane et al 2012[29]), Croatia (Vinter-Repalust et al 2004[25]), USA (Hu et al 2013[39])                                                                                                                                                                                                                                                                                                             |
| Lack of knowledge                                     | Croatia (Vinter-Repalust et al 2004[25])                                                                                                                                                                                                                                                                                                                                                                                                               |
| Lack of motivation                                    | Croatia (Vinter-Repalust et al 2004[25])                                                                                                                                                                                                                                                                                                                                                                                                               |
| Lack of information/ understanding from doctors       | UK (Brown et al 2007[32], Choudhury et al 2009[33])                                                                                                                                                                                                                                                                                                                                                                                                    |
| Low self-esteem                                       | Croatia (Vinter-Repalust et al 2004[25]), USA (Rustveld et al 2009[40])                                                                                                                                                                                                                                                                                                                                                                                |
| <b><i>Patient related factors (life-style)</i></b>    |                                                                                                                                                                                                                                                                                                                                                                                                                                                        |
| Decrease alcohol intake                               | Canada (Jolles et al 2013[24]),                                                                                                                                                                                                                                                                                                                                                                                                                        |
| Decrease caffeine intake                              | Canada (Jolles et al 2013[24]), South Africa (Mshunqane et al 2012[29])                                                                                                                                                                                                                                                                                                                                                                                |
| Diet                                                  | Australia (Cotrell et al 2013[21]), Brazil (Peres et al 2007[22]), Canada (Jolles et al 2013[24]), Croatia (Vinter-Repalust et al 2004[25]), Ireland (Smith et al 2002[26]), UK (Brown et al 2007[32], Choudhury et al 2009[33], Grace et al 2008[34], Heymann et al 2012[35], Lawton et al 2006[36]), USA (Coronado et al 2004[38], Hu et al 2013[39], Rustveld et al 2009[40]), South Africa (Mshunqane et al 2012[29]), Taiwan (Lai et al 2005[31]) |
| Lack of exercise                                      | Brazil (Peres et al 2007[22]), Canada (Jolles et al 2013[24]), UK (Brown et al 2007[32], Choudhury et al 2009[33], Grace et al 2008[34], Heymann et al 2012[35], Lawton et al 2006[36]), South Africa (Mshunqane et al 2012[29]), USA (Coronado et al 2004[38], Hu et al 2013[39], Rustveld et al 2009[40])                                                                                                                                            |
| Lack of time to see doctor                            | Malaysia (Al-Qazaz et al 2011[27])                                                                                                                                                                                                                                                                                                                                                                                                                     |

|                                                              |                                                                                                                                                                                                                                                                                                                                                          |
|--------------------------------------------------------------|----------------------------------------------------------------------------------------------------------------------------------------------------------------------------------------------------------------------------------------------------------------------------------------------------------------------------------------------------------|
| Obesity                                                      | Brazil (Peres et al 2007[22]),<br>South Africa (Mshunqane et al 2012[29]),<br>UK (Brown et al 2007[32]), USA (Coronado et al<br>2004[38])                                                                                                                                                                                                                |
| Smoking                                                      | Canada (Jolles et al 2013[24]),<br>UK ( Heymann et al 2012[35])                                                                                                                                                                                                                                                                                          |
| Stress                                                       | Ireland (Smith et al 2002[26]),<br>UK ( Brown et al, 2007[32], Grace et al 2008[34],<br>Heymann et al 2012[35]), USA (Coronado et al<br>2004[38])                                                                                                                                                                                                        |
| <b>Medicine related factors</b>                              |                                                                                                                                                                                                                                                                                                                                                          |
| Belief in natural remedies as<br>alternative to medicines    | Spain (Gascon et al 2004[30]),<br>UK (Brown et al 2007[32]), USA (Coronado et al<br>2004[38])                                                                                                                                                                                                                                                            |
| Difficulty/ refusal to take<br>medicine                      | Brazil (Peres et al 2007[22]),<br>Croatia (Vinter-Repalust et al 2004[25])                                                                                                                                                                                                                                                                               |
| Fear of being stuck with<br>medicines all life               | Spain (Gascon et al 2004[30]),<br>UK (Gordon et al 2007[7])                                                                                                                                                                                                                                                                                              |
| Fear of side effects                                         | Ireland (Smith et al 2002[26]), Malaysia (Al-Qazaz<br>et al 2011[27]), UK ( Heymann et al 2012[35]),<br>Spain (Gascon et al 2004[30]), Taiwan (Lai et al<br>2005[31])                                                                                                                                                                                    |
| Fear of the chemical nature<br>of medicines                  | Taiwan (Lai et al 2005[31]), UK (Brown et al<br>2007[32])                                                                                                                                                                                                                                                                                                |
| Forgetfulness                                                | Brazil (Peres et al 2007[22]), Malaysia (Al-Qazaz et<br>al 2011[27], Mohd Ali and Jusoff 2009[28]), Spain<br>(Gascon et al 2004[30])                                                                                                                                                                                                                     |
| Lack of belief in medicines                                  | Australia (Cotrell et al 2013[21])                                                                                                                                                                                                                                                                                                                       |
| Lack of knowledge about<br>medicines mechanism of<br>actions | Canada (Jolles et al 2013[24]),<br>Spain (Gascon et al 2004[30]), UK (Gordon et al<br>2007[7])                                                                                                                                                                                                                                                           |
| Non-adherence                                                | Canada (Jolles et al 2013[24]), Croatia (Vinter-<br>Repalust et al 2004[25]), Taiwan (Lai et al<br>2005[31]), UK (Gordon et al 2007[7]), USA (Hu et al<br>2013[39], Rustveld et al 2009[40])                                                                                                                                                             |
| Polypharmacy                                                 | Brazil (Peres et al 2007[22])                                                                                                                                                                                                                                                                                                                            |
| <b>Condition related factors</b>                             |                                                                                                                                                                                                                                                                                                                                                          |
| Lack of control over condition                               | Brazil (Peres et al 2007[22]), Ireland (Smith et al<br>2002[26])                                                                                                                                                                                                                                                                                         |
| Lack of knowledge/<br>understanding<br>of condition          | Australia (Cotrell et al 2013[21]), Cameroon (Kiawi<br>et al 2006[23]), Canada (Jolles et al 2013[24]),<br>Malaysia (Al-Qazaz et al 2011[27], Mohd Ali and<br>Jusoff 2009[28]), Spain (Gascon et al 2004[30]), UK<br>(Brown et al 2007[32], Choudhury et al 2009[33],<br>Heymann et al 2012[35], Peele et al 2004[37]), USA<br>(Coronado et al 2004[38]) |
| Fear of condition, its causes<br>and complications           | South Africa (Mshunqane et al 2012[29]),<br>UK (Choudhury et al 2009[33], Lawton et al<br>2006[36]), USA (Coronado et al 2004[38])                                                                                                                                                                                                                       |
| Stress from condition                                        | Croatia (Vinter-Repalust et al 2004[25])                                                                                                                                                                                                                                                                                                                 |



## Patient-related factors

### *Socioeconomic-related factors*

Patients from six countries reported socioeconomic factors leading to MRPs in both DM and CVDs, including: beliefs, family history of the condition, poor finances, relationships with healthcare professionals (lack of communication and not enough education), inadequate knowledge, and low self-esteem (Table 2).

Beliefs regarding CVDs/DM were reported as a problem in three studies from the United Kingdom.[32 34 36] Patients perceived that DM was given by God and higher powers had control over their condition. One patient reported:

*“God has given me this disease of sugar. Whatever happens, it happens because God wants it to happen.”*

Moreover, a family history of DM was reported in three studies from the United Kingdom[34 36] and the United States.[38]

In addition, poor finances were reported by patients in four studies from Ireland,[26] South Africa,[29] Croatia,[25] and the United States.[39] A lack of necessary finances prevents patients from buying the appropriate food (for their diet)[29] and going to doctors.[26]

Consequently, the financial situation implicated the relationship of the patients with the healthcare professionals. Patients have reported that they were not getting value for their money from healthcare providers.[26] For instance, one patient reported:

*“I don’t mind paying when I’m sick, but it’s very expensive to pay the GP when I’m only getting a check-up with the nurse.”*

Thus, the patients felt victimised by healthcare professionals[25 26 29] and reported a lack of communication with healthcare professionals.[18] They

1  
2  
3 described doctors as either too busy to see them[26 27] or not giving enough  
4 information about diagnosis and medicines.[32 33 37] Other patients reported  
5 having been belittled by doctors.[25] In another study, patients accounted for  
6 the lack of communication with healthcare professionals by language  
7 barriers.[33]  
8  
9

10  
11  
12  
13 Subsequently, patients reported a lack of knowledge as a major cause for  
14 type 2 DM.[25] This situation led to the lack of motivation about their disease  
15 and affected the intake of medicines. Patients asserted the need for further  
16 education and training about their condition.  
17  
18  
19

20  
21 A lack of knowledge resulted in the patients' low-self esteem towards their  
22 condition.[25 40] Hence, patients felt unaccepted socially, less comfortable  
23 with their colleagues, and less worthy for being diabetic.[25 40]  
24  
25  
26

#### 27 28 *Lifestyle-related factors*

29 Lifestyle-factors were reported in studies from 11 countries and included: diet  
30 (excessive alcohol/caffeine intake), lack of exercise, lack of time to see the  
31 doctor, obesity, smoking, and stress.  
32  
33  
34

35  
36 Diet was a major issue stated in 16 studies (Table 2). In this respect, patients  
37 had different behaviours towards their diet. For instance, one group of  
38 patients admitted the importance of a healthy diet, yet could not control their  
39 diets.[22 31-33] Thus, one participant reported:[22]  
40  
41  
42

43  
44  
45 *“Regarding the diet, I try to fight so as not to eat*  
46 *certain foods, but sometimes I can't help myself.”*  
47  
48

49 In this respect, patients appreciated the importance of a healthy diet in  
50 controlling DM,[32] yet overestimated its importance to be beyond  
51 medicines.[31] They were also aware that a poor diet, including excess  
52 alcohol[24] and caffeine intake,[24 29] exacerbated their conditions. Another  
53 group of patients misunderstood the concept of a healthy diet. They believed  
54 that eating bitter foods could control DM[33] or applied portion sizes to their  
55  
56  
57  
58  
59  
60

1  
2  
3 diets.[40] In the latter case, patients had difficulty eating smaller portions  
4 and/or even changing their favourite foods. On other occasions, patients  
5 claimed that diet quality was responsible for DM.[26]  
6  
7

8  
9  
10 In addition, a lack of exercise was reported in 11 studies from five countries,  
11 including Brazil,[22] Canada,[24] the United Kingdom,[32-36] South Africa,[29]  
12 and the United States.[38-40] A group of patients overestimated the  
13 importance of exercise, claiming that it can cure any existing disease.[31]  
14 Patients reported difficulty exercising although they were aware of its  
15 importance.[36 40] They justified their work, travel, stress, the weather, and  
16 lack of time as the reasons behind their decreased physical exercise.[22 33  
17 34 36 39] A lack of time was more reported in females whose culture  
18 expected them to stay indoors after they got married.[36]  
19  
20  
21  
22  
23

24  
25  
26 Moreover, obesity was described in four studies (Brazil, [22] South Africa,[29]  
27 the United Kingdom,[32] and the United States[38]) as a cause of DM.  
28 Patients blamed weight gain as the cause for their increase in blood glucose  
29 level and diabetic complications.[32 38] Moreover, they attributed insulin as  
30 one of the causes of obesity.[32]  
31  
32  
33  
34  
35

36  
37 Stress emerged in five studies from three countries, including Ireland,[26] the  
38 United Kingdom,[32 34 35] and the United States.[38] Stress was identified as  
39 a result of changes in culture and climate, poor housing, and migration of  
40 ethnic minorities.[38] Patients considered stress to be major cause of their  
41 condition.[26 32 34 35 38 40] For instance, one patient reported:  
42  
43  
44  
45

46 *"In 1998, my mother died, and I was unable to go to the funeral. During these*  
47 *months, I developed diabetes."*  
48  
49

50  
51 Patients also perceived that stress control could be an effective way to cure  
52 their condition[34] since stress led to a poor diet, smoking, and a lack of  
53 exercise.  
54  
55

### 56 57 58 **Medicine-related factors**

1  
2  
3 Medicine-related factors were found in 14 studies from 11 countries and  
4 included two types of factors: factors related to the use of medicines and  
5 factors related to knowledge about medicines.  
6  
7

8  
9 Factors related to the use of medicines included medicine non-adherence and  
10 polypharmacy. Medicine non-adherence was reported in 10 studies from  
11 seven countries, including Brazil,[22] Canada,[24] Croatia,[25] Malaysia,[27  
12 28] Spain,[30] Taiwan,[31] the United Kingdom,[7] and the United States.[39  
13 40] Patients justified non-adherence to medicines as difficulty following the  
14 treatment regimen,[25] depression and stress,[40] forgetfulness in taking the  
15 medicines,[7 22 27 28 30] a lack of routine in taking the medicines,[24]  
16 changes in medicine routines,[24] and the inconvenience of taking insulin. For  
17 instance, patients complained that oral hypoglycemics are more convenient to  
18 take than insulin:[30]  
19  
20  
21  
22  
23  
24  
25  
26

27  
28 *“I prefer pills more than insulin. You know, swallowing a pill causes no pain.*  
29 *And when I know I will eat more I just take another pill or an extra half.”*  
30  
31

32  
33 Furthermore, intentional non-adherence was reported in some studies where  
34 patients changed their insulin doses depending on their food regimen.[30] In  
35 another scenario, patients stopped taking their medicines when they  
36 exercised, acting on the assumption that exercise reduces blood sugar level.  
37 Thus, patients changed the dose/regimen of their medicines to fit with their  
38 daily activities.[7]  
39  
40  
41  
42  
43

44  
45 Polypharmacy was reported among patients with type 2 DM in two studies  
46 from Brazil[22] and Canada.[28] Polypharmacy caused inconvenience in  
47 taking medicines:[22]  
48  
49

50  
51 *“Medication: this has been my biggest problem in*  
52 *this current phase. I take medication for blood pressure,*  
53 *circulation, diabetes, vitamins. I used to mix up the time of*  
54 *each, but today, thanks to orientation, I’m overcoming this*  
55 *stage.”*  
56  
57  
58  
59  
60

1  
2  
3  
4  
5 Factors relating to knowledge about medicines included lack of knowledge  
6 about how the medicines worked, fear of the chemical nature of medicines  
7 and their side effects, and a lack of belief in medicine.  
8

9  
10  
11 The lack of knowledge about how medicines worked was described in three  
12 studies in Canada,[24] the United Kingdom,[7] and Spain.[30] Patients could  
13 not identify most of their medicines apart from the diuretics, which they called  
14 “water pills.”[24] Moreover, patients could not understand how their medicines  
15 worked, even when they read the patient information leaflet.[30]  
16  
17  
18

19  
20  
21 This lack of knowledge created fear in patients regarding the chemical nature  
22 of medicines, the side effects of medicines, and being obliged to take  
23 medicines all of their lives.[7 26 27 30-32 35] For instance, patients referred to  
24 oral hypoglycemic agents and insulin as “pharmaceutical toxins.”[31]  
25  
26  
27

28  
29  
30 Additionally, patients were afraid of the side effects and complications of  
31 medicines. They attributed various side effects to medicines, including  
32 hypoglycemia and gastrointestinal disturbances to insulin,[32] kidney failure to  
33 oral hypoglycemic agents,[31] and nausea/vomiting to antihypertensive  
34 agents.[30] In the last case, a patient reported:  
35  
36  
37

38  
39  
40 *“I don’t like them (medicines); they have lots of side*  
41 *effects. They can make you sick... I think that I might*  
42 *get worse instead of better.”*  
43  
44  
45

46  
47 These fears promoted a lack of belief in medicines among patients.[21]  
48 Subsequently, patients started to believe in natural remedies as an alternative  
49 to medicines.[30 32 38] They referred to natural therapies as “a cure” that  
50 should be used alongside traditional medicines.[38] In another scenario,  
51 patients believed that natural therapies were superior to medicines.[32] In this  
52 respect, natural therapies reported for curing DM included natural drinks  
53 (composed of minerals and water);[38] and plant products (such as aloe vera,  
54 arnica, cactus, silk cottonwood tree, tree spinach, and violet water).[32]  
55  
56  
57  
58  
59  
60

### **Condition-related factors**

Condition (clinical)-related factors were reported from 11 countries as a major theme. Factors included a lack of knowledge/understanding of the condition, fear of the condition and its complications, stress from the condition, and a lack of control over the condition.

Lack of knowledge/understanding of the condition (CVDs/DM) emerged as a major theme in 11 studies from seven countries, including Australia,[21] Cameroon,[23] Canada,[24] Malaysia,[27 28] Spain,[30] the United Kingdom,[32 33 35 37] and the United States.[38]

For CVDs, patients expressed a lack of knowledge about their heart failure, hypertension, and stroke. Patients with heart failure did not know enough about their disease symptoms.[21] Moreover, hypertensive patients did not understand the nature of their disease,[28 30] struggled to define their condition,[24] and considered it an underlying risk factor to myocardial infarction rather than a disease.[35] Patients justified their lack of knowledge by citing short consultations with physicians, not obtaining enough information from physicians, and obtaining information from non-medical sources such as television and magazines. For instance, one patient reported:

*“Anything I know about blood pressure I’ve read in books, the doctor tells me absolutely nothing . . . High blood pressure: factors related to compliance with treatment 127. I want him to tell me where high blood pressure comes from.”*

Similarly, patients with DM lacked knowledge about the disease and misunderstood its causes and complications.[23 25 27 29 32 33 36] Regarding the DM condition and causes, patients’ perceptions of DM were influenced by other people’s accounts and experiences.[32] Patients viewed the condition as an illness that took away their health and strength[36] and changed their lifestyle.[25] They could not differentiate between DMT1 and type 2 DM,[27] considered high sugar intake to be the cause of DM, and

1  
2  
3 perceived DM to be sexually and genetically transmitted.[23 33] Moreover,  
4 patients believed that diabetes was not dangerous if it did not require  
5 insulin.[32] Patients were only aware of the microvascular complications (such  
6 as foot disease) of DM.[26] Moreover, they were aware of the disease's signs  
7 and symptoms (such as dry mouth, tiredness, dizziness, irritation, blurred  
8 vision, micturition, and extreme thirst) only after they encountered them.[28  
9 38]

10  
11  
12  
13  
14  
15  
16 The lack of knowledge about the condition created fear in the patients' minds  
17 of the disease itself[38] and they could not accept the disease easily.[25 33]  
18 One patient reported:[38]

19  
20  
21  
22  
23 *"Diabetes is a disease that kills you little by little."*

24  
25  
26 Diseases additionally resulted in stress about the condition that was  
27 particularly observed in patients with multiple comorbidities.[36] For instance,  
28 diabetic patients who had asthma as a comorbidity could not exercise due to  
29 asthma symptoms, such as shortness of breath and swollen feet and joints:  
30  
31  
32

33  
34  
35 *"They tell you to exercise...*

36 *but I can't move around a lot because I have*  
37 *a problem with my leg (arthritis). If I walk a little,*  
38 *then it swells up."*  
39  
40  
41  
42

43 As a result, patients were not able to control their condition,[22 26] which led  
44 to frustration, depression, and anxiety.  
45  
46  
47

## 48 49 **DISCUSSION**

50  
51  
52 To our knowledge, this review is the first systematic analysis of the  
53 perspectives of adult patients with CVDs/DM on contributory factors leading to  
54 MRPs. We explored the patients' knowledge, beliefs, and behaviours towards  
55 medicines. The majority of studies evaluated patients with DM; only a few  
56  
57  
58  
59  
60



1  
2  
3 studies evaluated patients with CVDs. The three themes emerging from this  
4 review included: patient- (socioeconomic- and lifestyle-), clinical-, and  
5 medicine-related factors.  
6  
7

### 8 9 10 **Patient-related factors**

#### 11 *Socioeconomic-related factors*

12 Socioeconomic factors (genetic, cultural behaviour, and financial situations)  
13 affected the patients' perceptions of disease and the medicines contributing to  
14 MRPs. Patients perceived genetic factors and religious beliefs to be the cause  
15 of their DM.[19 21] Patients from both Christian and Muslim backgrounds  
16 named God as the cause for their DM. These attitudes were confirmed by  
17 other studies that showed that religious values contributed to MRPs.[41 42] In  
18 addition, patients felt socially for their DM, which affected their self-esteem.  
19 They also blamed their financial situation for contributing to MRPs, since their  
20 finances prevented them from having the right diet and being able to afford  
21 doctors' visits. The cost of therapy has been perceived as being important,  
22 particularly with chronic conditions such as CVDs.[43] Thus, the value that the  
23 patients receive from healthcare professionals for their money was  
24 unsatisfactory. In fact, doctors' attitudes towards the patients played an  
25 important role in the patients being compliant with their regimens.[44] This  
26 problem was significant in ethnic minorities where a lack of communication  
27 between doctors and patients lead to misunderstanding.[41] Patients  
28 confirmed the need for further information and training, emphasising the  
29 importance of getting information from healthcare professionals.  
30  
31  
32  
33  
34  
35  
36  
37  
38  
39  
40  
41  
42  
43

#### 44 *Lifestyle-related factors*

45 Lifestyle factors were perceived as a vital component for the control of  
46 conditions (CVDs/DM). Patients felt that they needed to adjust their diet,  
47 engage in physical activity, and manage their moods to cope with conditions.  
48 In relation to diet, they either did not understand the concept of a healthy diet  
49 or they had difficulty managing a good diet. Thus, some patients assumed  
50 that a healthy diet meant eating less food, eating "bitter food," or eating  
51 "natural food." Other patients overestimated the importance of diet as being  
52 more crucial than medicines. This overestimation can be attributed to the fact  
53  
54  
55  
56  
57  
58  
59  
60



1  
2  
3 that the frequency of meals could serve as a reminder to take medicines.[43]  
4 In addition, patients were aware of the necessity of physical exercise but  
5 blamed the weather, work, lack of time, and stress for their not exercising.[43]  
6 Stress was a major factor that patients blamed for not taking medicines on  
7 time and eating a poor diet.  
8  
9  
10

### 11 12 13 **Medicine-related factors**

14 Medicines were recognised by patients as a contributing factor to MRPs with  
15 regards to lack of knowledge about medicines, lack of belief that medicines  
16 are good, difficulty taking medicines on time, and fear of side effects. Patients  
17 reported a lack of knowledge about how the medicines worked, called them  
18 pharmaceutical toxins, and preferred herbal remedies to medicines. This point  
19 was emphasised in another study[41] that stated that the patients' lack of  
20 awareness about the use of their medicines led to MRPs. Furthermore,  
21 patients reported skipping medicines doses due to forgetfulness or they did  
22 not take their medicines on purpose (at the time of exercise). Forgetfulness in  
23 terms of taking medicines was observed more often in patients who did not  
24 have regular meals.[43] At other times, patients were scared of the side  
25 effects and complications of medicines. The medicines' side effects caused  
26 physical discomfort for patients, who started to doubt the therapy's  
27 effectiveness and skipped their medicines.[43]  
28  
29  
30  
31  
32  
33  
34  
35  
36  
37  
38  
39

### 40 **Condition-related factors**

41 Condition (clinical) factors reported by the patients revealed a lack of  
42 knowledge about the disease and its cause, a lack of control over the disease,  
43 and the existence of comorbidities with the disease.[43] Patients were  
44 accordingly not fully aware of their condition and perceived it in most cases as  
45 being a risk factor leading to other diseases. Moreover, they misidentified the  
46 causes and complications of their condition. Once the education about the  
47 condition was provided, patients felt scared and frustrated, which induced a  
48 lack of control over the disease. Moreover, the existence of comorbidities with  
49 the main condition worsened the patients' adherence to treatment and advice.  
50  
51  
52  
53  
54  
55  
56  
57  
58  
59  
60

### Strengths and weaknesses of the review

This review proposes a systematic and comprehensive approach to qualitative studies of contributory factors to MRPs of adult patients with CVDs/DM. We adopted a thematic synthesis approach to eligible studies regarding the treatment experiences from patients' perspectives. The studies involved 836 participants. However, despite the diversity of the participants and different contexts in the studies, we were able to develop themes that indicated an overlap among the studies.

We used recognised methods from the literature regarding patients' experiences/perspectives in order to synthesise and develop analytical themes.[18 45] We included the details of each study in relation to the aims, participants, settings, and methods applied. We rated the studies' qualities based on methods from the literature. In this respect, we found that studies with the highest ratings contributed most to the final analytical themes.

One limitation of the review is that it was restricted to the experiences of the patients involved in the studies. Moreover, perspectives and beliefs of non-English speaking patients and those seeking palliative care were not integrated in this review due to lack of studies representing them. Thus, the review was extracted from studies in 12 countries only. Therefore, the generalisability of the findings of this review to patients from different countries (other than the 12 aforementioned countries) may be difficult. However, the analytical themes developed offer a high level of conceptual thinking that can be applied across different contexts.

### Implications of the research

This review examined the contribution of patients' perceptions, behaviours, and beliefs in understanding different aspects of underlying risk factors that may lead to MRPs. Syntheses of the qualitative research on such risk factors should complement the findings from quantitative research. Having a systematic review when planning new qualitative research may help to avoid unintentional examination of questions that have already been extensively researched. Finally, the findings of this study on patients' perspectives could

1  
2  
3 better inform the development of future screening tools and interventions for  
4 avoiding MRPs. Additionally, our results may also increase researchers'  
5 knowledge of generic issues in this field, even when attempting to target a  
6 specific ethnic or cultural group.  
7  
8  
9

### 10 11 **Implication towards practices**

12 Patients' perspectives about medicine use and factors affecting their  
13 treatment regimen are often different from the medical viewpoint. Worldwide,  
14 people with CVD and/or DM widely perceive that their conditions are  
15 principally stress-related conditions and fear addiction or dependence on  
16 medicines, which leads to non-adherence to required treatments. These  
17 misconceptions and fears commonly cause people to reduce or stop  
18 treatment. If we are to be successful at minimising and preventing MRPs,  
19 incorporating patients' perspectives as well as considering medical records  
20 are paramount. An increased understanding between doctors and their  
21 patients must play a part in future strategies for reducing MRPs in patients  
22 with CVDs and/or DM.  
23  
24  
25  
26  
27  
28  
29  
30  
31  
32

### 33 **CONCLUSIONS**

34 This thematic synthesis of qualitative studies on patients' perspectives of the  
35 potential risk factors of MRPs shows that underlying factors that may lead to  
36 MRPs require further in-depth research. Factors influencing patients' success  
37 in treatment included patient-related (socioeconomic and lifestyle), medicine-  
38 related (fear of medicine, non-adherence, and polypharmacy), and condition-  
39 related factors (fear of condition and its complications). In summary, more  
40 qualitative research should be conducted on patients with CVDs and/or DM to  
41 understand and address issues related to the treatment regimens and  
42 subsequently reduce the cost of undesired hospital admissions resulting from  
43 MRPs.  
44  
45  
46  
47  
48  
49  
50  
51  
52  
53  
54  
55  
56  
57  
58  
59  
60

1  
2  
3  
4  
5 **Contributors** AA participated in protocol development, literature searching,  
6 data extraction, data analysis, and manuscript preparation. MG participated in  
7 protocol development, data analysis, literature searching, data extraction, and  
8 manuscript preparation. HA participated in protocol development, data  
9 analysis, and manuscript preparation. ZA participated in protocol  
10 development, literature searching, data extraction, and manuscript  
11 preparation. All authors have read and approved the final manuscript.  
12  
13  
14  
15  
16

17  
18 **Funding** There are no funders for this work.  
19

20  
21 **Competing interests** None.  
22

23  
24 **Ethics approval** Systematic review.  
25  
26

27  
28 **Provenance and peer review** Not commissioned; externally peer reviewed.  
29  
30

31 **Data sharing statement** No additional data available.  
32  
33  
34  
35  
36  
37  
38  
39  
40  
41  
42  
43  
44  
45  
46  
47  
48  
49  
50  
51  
52  
53  
54  
55  
56  
57  
58  
59  
60

## References

1. Fernandez-Illimos F, Faus M, Gastelurrutia M, et al. Evolution of the concept of drug-related problems : outcomes as the focus of the new paradigm Evolución del concepto de problemas relacionados con medicamentos : resultados como el centro del nuevo paradigma. *Seguimiento Farmacoterapeutico* 2005;**3**(4):167-88
2. Rozich J, Resar R. Medication Safety : One Organisation' s Approach. *Journal of Clinical Outcomes Management* 2001;**8**(10):27-34
3. Ruths S, Viktil K, Blix H. Classification of drug-related problems. *he Journal of the Norwegian Medical Association* 2007;**127**:3073-76
4. Wester K, Jönsson A, Spigset O, et al. Incidence of fatal adverse drug reactions: a population based study. *British journal of clinical pharmacology* 2008;**65**(4):573-79
5. State of the Nation. 2012 ed. UK: Diabetes UK, 2012.
6. Organisation WH. New data highlight increases in hypertension, diabetes incidence, 2012.
7. Gordon K, Smith F, Dhillon S. Effective chronic disease management: Patients' perspectives on medication-related problems. *Patient Educ Couns* 2007;**65**(3):407-15
8. Schainberg A, Ribeiro-Oliveira A, Ribeiro J. Is there a link between glucose levels and heart failure? An update. *Arq Bras Endocrinol Metab* 2004;**54**(5):488-97
9. Milicevic Z, Raz I, Beattie S, et al. Natural History of Cardiovascular Disease in Patients With Diabetes Role of hyperglycemia. *Diabetes Care* 2008;**31**(S2):S155-60
10. Brenson R, Britten N. Patients' decisions about whether or not to take antihypertensive drugs: qualitative study. *BMJ* 2002;**325**:873-77
11. Daly J, Denaro C, Emmerton L. Exploring beliefs about heart failure treatment in adherent and nonadherent patients: use of the repertory grid technique. *Patient Prefer Adherence* 2013;**7**:141-50 doi: 10.3122/jabfm.2009.03.080114 Attitudes[published Online First: Epub Date]].
12. Huri H, Wee H. Drug related problems in type 2 diabetes patients with hypertension: A cross-sectional retrospective study. *BMC Endocrine Disorders* 2013;**13**(1):2-14
13. Zaman Huri H, Chai Ling L. Drug-Related Problems in Type 2 diabetes mellitus Patients with Dyslipidemia. *BMC Public Health* 2013;**13**:1192 doi: 10.1186/1471-2458- 13-1192[published Online First: Epub Date]].
14. Claydon-Platt K, Manias E, Dunning T. Medication-related problems occurring in people with diabetes during an admission to an adult teaching hospital: a retrospective cohort study. *Diabetes research and clinical practice* 2012;**97**(2):223-30
15. Haugbolle LS, Sorensen EW. Drug-related problems in patients with angina pectoris, type 2 diabetes and asthma--interviewing patients at home. *Pharmacy world & science : PWS* 2006;**28**(4):239-47 doi: 10.1007/s11096-006-9023-9[published Online First: Epub Date]].
16. Al Hamid A, Ghaleb M, Aljadhey H, et al. A systematic review of hospitalisation resulting from medicine related problems in adult patients. *British journal of clinical pharmacology* 2013 doi: doi: 10.1111/bcp.12293[published Online First: Epub Date]].

17. Dixon-Woods M, Bonas S, Booth A, et al. How can systematic reviews incorporate qualitative research? A critical perspective. *Qualitative Research* 2006;**6**(1):27-34
18. Lucas P, Baird J, Arai L, et al. Worked examples of alternative methods for the synthesis of qualitative and quantitative research in systematic reviews. *BMC Med Res Methodol* 2007;**7**(1):4
19. Kruper A, Lingard L, Levinson W. Critically appraising qualitative research. *BMJ* 2008;**337**:a1035
20. Programme CAS. 10 questions to help you make sense of qualitative research. 2013. [http://media.wix.com/ugd/dded87\\_951541699e9edc71ce66c9bac4734c69.pdf](http://media.wix.com/ugd/dded87_951541699e9edc71ce66c9bac4734c69.pdf) (accessed 24-05-2014).
21. Cottrell WN, Denaro CP, Emmerton L. Exploring beliefs about heart failure treatment in adherent and nonadherent patients: use of the repertory grid technique. *Patient Prefer Adherence* 2013;**7**:141-50 doi: 10.2147/PPA.S40725[published Online First: Epub Date]].
22. Péres D, dos Santos M, Zanetti M, et al. DIFFICULTIES OF DIABETIC PATIENTS IN THE ILLNESS CONTROL: FEELINGS AND BEHAVIORS. *Rev Latino-am Enfermagem* 2007;**15**(6):1105-12
23. Kiawi E, Edwards R, Shu J, et al. KNOWLEDGE, ATTITUDES, AND BEHAVIOR RELATING TO DIABETES AND ITS MAIN RISK FACTORS AMONG URBAN RESIDENTS IN CAMEROON: A QUALITATIVE SURVEY. *Ethnicity and disease* 2006;**16**:503-09
24. Jolles EP, Padwal RS, Clark AM, et al. A Qualitative Study of Patient Perspectives about Hypertension. *ISRN Hypertension* 2013;**2013**:1-10 doi: 10.5402/2013/671691[published Online First: Epub Date]].
25. Vinter-Repalust N, Petriček G, Katiaë M. Obstacles which Patients with Type 2 Diabetes Meet while Adhering to the Therapeutic Regimen in Everyday Life: Qualitative Study. *Croatia Medical Journal* 2004;**45**(5):630-36
26. Smith S, O'Leary M, Bury G, et al. qualitative investigation of the views and health beliefs of patients with Type 2 diabetes following the introduction of a diabetes shared care service. *Diabet Med* 2003;**20**:853-7
27. Al-Qazaz HK, Hassali MA, Shafie AA, et al. Perception and knowledge of patients with type 2 diabetes in Malaysia about their disease and medication: a qualitative study. *Research in social & administrative pharmacy : RSAP* 2011;**7**(2):180-91 doi: 10.1016/j.sapharm.2010.04.005[published Online First: Epub Date]].
28. Mohd Ali S, Jusoff D. Barriers to Optimal Control of Type 2 Diabetes in Malaysian Malay Patients. *Global Journal of Health Science* 2009;**1**(2):106-18
29. Mshunqane N, Stewart AV, Rothberg AD. Type 2 diabetes management: Patient knowledge and health care team perceptions, South Africa. *African Journal of Primary Health Care & Family Medicine* 2012;**4**(1) doi: 10.4102/phcfm.v4i1.392[published Online First: Epub Date]].
30. Gascón J, Sánchez-Ortuño M, Llor B, et al. Why hypertensive patients do not comply with the treatment. *Family Practice* 2004;**21**(2):125-30



- 1
- 2
- 3 31. Lai WA, Lew-Ting CY, Chie WC. How diabetic patients think about and
- 4 manage their illness in Taiwan. *Diabet Med* 2005;**22**(3):286-92 doi:
- 5 10.1111/j.1464-5491.2004.01406.x[published Online First: Epub Date]].
- 6 32. Brown KA, M Hubbard, M. Health beliefs of African–Caribbean people
- 7 with type 2 diabetes:
- 8 a qualitative study. *British Journal of Clinical Practice* 2007;**57**:461-70
- 9 33. Choudhury SM, Brophy S, Williams R. Understanding and beliefs of
- 10 diabetes in the UK Bangladeshi population. *Diabet Med*
- 11 2009;**26**(6):636-40 doi: 10.1111/j.1464-5491.2009.02741.x[published
- 12 Online First: Epub Date]].
- 13 34. Grace C, Begum R, Subhani S, et al. Prevention of type 2 diabetes in
- 14 British Bangladeshis: qualitative study of community, religious, and
- 15 professional perspectives. *BMJ* 2008;**337**:a1931 doi:
- 16 10.1136/bmj.a1931[published Online First: Epub Date]].
- 17 35. Heymann A, Valinsky L, Inbar Z, et al. Perceptions of hypertension
- 18 treatment among patients with and without diabetes. *BMC family*
- 19 *practice* 2012;**13**:24-30 doi: 10.1186/1471-2296-13-24[published
- 20 Online First: Epub Date]].
- 21 36. Lawton J, Ahmad N, Hanna L, et al. 'I can't do any serious exercise':
- 22 barriers to physical activity amongst people of Pakistani and Indian
- 23 origin with Type 2 diabetes. *Health education research* 2006;**21**(1):43-
- 24 54 doi: 10.1093/her/cyh042[published Online First: Epub Date]].
- 25 37. Peel E, Parry O, Douglas M, et al. Diagnosis of type 2 diabetes: a
- 26 qualitative analysis of patients' emotional reactions and views about
- 27 information provision. *Patient Educ Couns* 2004;**53**(3):269-75 doi:
- 28 10.1016/j.pec.2003.07.010[published Online First: Epub Date]].
- 29 38. Coronado G, Thompson B, Tejada S, et al. Attitudes and Beliefs Among
- 30 Mexican Americans About Type 2 Diabetes. *Journal of Health Care for*
- 31 *the Poor and Underserved* 2004;**15**(4):576-88
- 32 39. Hu J, Amirehsani K, Wallace DC, et al. Perceptions of barriers in
- 33 managing diabetes: perspectives of Hispanic immigrant patients and
- 34 family members. *The Diabetes educator* 2013;**39**(4):494-503 doi:
- 35 10.1177/0145721713486200[published Online First: Epub Date]].
- 36 40. Rustveld L, Pavlik V, Jibaja-Weiss M, et al. Adherence to diabetes self-
- 37 care behaviors
- 38 in english- and spanish-speaking hispanic men. *Patient Preference and*
- 39 *Adherence* 2009;**3**:123-30
- 40 41. Alhomoud F, Dhillon S, Aslanpour Z, et al. Medicine use and medicine-
- 41 related problems experienced by ethnic minority patients in the United
- 42 Kingdom: A review. *Int J Pharm Pract* 2013;**21**(5):277-78
- 43 42. Peeters E, Parry O, Douglas M, et al. Diagnosis of type 2 diabetes: a
- 44 qualitative analysis of patients' emotional reactions and views about
- 45 information provision. *Patient Educ Couns* 2004;**53**:269-75
- 46 43. Jin J, Sklar G, Oh V, et al. Factors affecting therapeutic compliance: A
- 47 review from the patient's perspective. *Therapeutics and Clinical Risk*
- 48 *Management* 2008;**4**(1):269-76
- 49 44. Vermeire E, Hearnshaw H, Van Royan P, et al. Patient adherence to
- 50 treatment: three decades of research. A comprehensive review. *Journal of*
- 51 *clinical pharmacy and therapeutics* 2001;**26**(5):331-42
- 52
- 53
- 54
- 55
- 56
- 57
- 58
- 59
- 60

- 1  
2  
3 45. Thomas J, Harden A. Methods for the thematic synthesis of qualitative  
4 research in systematic reviews. BMC Med Res Methodol 2008;8(1):45-  
5 52  
6  
7  
8  
9  
10  
11  
12  
13  
14  
15  
16  
17  
18  
19  
20  
21  
22  
23  
24  
25  
26  
27  
28  
29  
30  
31  
32  
33  
34  
35  
36  
37  
38  
39  
40  
41  
42  
43  
44  
45  
46  
47  
48  
49  
50  
51  
52  
53  
54  
55  
56  
57  
58  
59  
60



1  
2  
3  
4  
5  
6  
7  
8  
9  
10  
11  
12  
13  
14  
15  
16  
17  
18  
19  
20  
21  
22  
23  
24  
25  
26  
27  
28  
29  
30  
31  
32  
33  
34  
35  
36  
37  
38  
39  
40  
41  
42  
43  
44  
45  
46  
47  
48  
49  
50  
51  
52  
53  
54  
55  
56  
57  
58  
59  
60

**Figure legend**

Figure 1 Data extraction and study selection process.

For peer review only

1  
2  
3 **A systematic review of qualitative research on the**  
4 **contributory factors leading to medicine-related problems**  
5 **from the perspectives of adult patients with cardiovascular**  
6 **diseases and diabetes mellitus**  
7  
8  
9

10 A Al Hamid, *PhD candidate (aalhamid@herts.ac.uk)*<sup>1</sup>, M Ghaleb, *Senior*  
11 *lecturer in pharmacy practice/patient safety*<sup>1</sup>, H Aljadhey, *Assistant professor*  
12 *in clinical pharmacy*<sup>2</sup> and Z Aslanpour, *Head of pharmacy and public health*  
13 *practice*<sup>1</sup>  
14  
15

16  
17 Authors Affiliations  
18

19 <sup>1</sup> *Department of Pharmacy, School of Life and Medical Sciences, University of*  
20 *Hertfordshire, Hatfield, AL10 9AB, UK.*

21 <sup>2</sup> *Medication Safety Research Chair, Clinical Pharmacy Department, College*  
22 *of Pharmacy, King Saud University, Riyadh, P.O. Box 2457, Saudi Arabia.*  
23  
24  
25

26 Correspondence to:

27 Mr A M Al Hamid  
28 Department of Pharmacy  
29 University of Hertfordshire  
30 College Lane Campus  
31 Hatfield, Herts  
32 AL10 9AB (UK)  
33 Telephone: +44 (0)1707-287242  
34 Fax: +44 (0)1707-285406  
35 Email: a.alhamid@herts.ac.uk  
36  
37

38  
39 *Keywords: Medicine-related problems, patients' perspectives, risk factors,*  
40 *cardiovascular diseases, and diabetes mellitus.*  
41

42 *Word Count: 3995*  
43

44 *Number of figures and tables: one figure and two tables*  
45

46 *Conflict of interest: The authors declare no conflict of interest*  
47

48  
49 *Disclaimer: I confirm that the views expressed in the submitted article are my*  
50 *own and not an official position of the institution or funder.*  
51

52 *We have read and understood BMJ policy on declaration of interests and*  
53 *declare the following interests: None*  
54  
55  
56  
57  
58  
59  
60

## ABSTRACT

**Objectives** To synthesise contributing factors leading to medicine-related problems (MRPs) in adult patients with cardiovascular diseases and/or diabetes mellitus from their perspectives.

**Design** A systematic literature review of qualitative studies regarding the contributory factors leading to MRPs, medication errors, and non-adherence, followed by a thematic synthesis of the studies.

**Data sources** We screened Pubmed, Embase, ISI Web of Knowledge, PsycInfo, International Pharmaceutical Abstract, and PsycExtra for qualitative studies (Interviews, focus groups, and questionnaires of a qualitative nature).

**Review methods** Thematic synthesis was achieved by coding and developing themes from the findings of qualitative studies.

**Results** The synthesis yielded 21 studies which satisfied the inclusion and exclusion criteria. Three themes emerged that involved contributing factors to MRPs: patient-related factors including both socioeconomic factors (beliefs, feeling victimised, history of the condition, lack of finance, lack of motivation, and low self-esteem) and lifestyle factors (diet, lack of exercise/time to see the doctor, obesity, smoking, and stress), medicine-related factors (belief in natural remedies, fear of medicine, lack of belief in medicines, lack of knowledge, non-adherence, and polypharmacy), and condition-related factors (lack of knowledge/understanding, fear of condition and its complications, and lack of control).

**Conclusions** MRPs represent a major health threat, especially among adult patients with cardiovascular diseases and/or diabetes mellitus. The patients' perspectives uncovered hidden factors that could cause and/or contribute to MRPs in these groups of patients.

### Article focus

- CVDs and DM represent a major health issue that accounts for more than half of the total death rate worldwide.
- The contribution of patients' beliefs and behaviours towards their medicines /conditions and its subsequent involvement in MRPs is still under-researched.
- An exploration of the contributory factors leading to MRPs in patients with CVDs/DM could help inform prospective interventions.

### Key messages

- MRPs constitute a major health concern especially for adult patients with CVDs and/or DM.
- Whereas medicine-related factors play important role in the incidence of MRPs; other contributing factors can be involved and include: Patient-related, life-style and clinical-related factors.
- Identifying the contributory factors leading to MRPs could help in mitigating/preventing incidence of MRPs. Thus, data from qualitative studies must be integrated with those of quantitative nature to develop efficient and practical interventions.

### Strengths and limitations of the study

- To our knowledge, it is the first systematic review conducted on qualitative research regarding the contributory factors leading to medicine-related problems from the perspectives of adult patients with cardiovascular diseases and diabetes mellitus.
- The study undertook a comprehensive systematic review with thematic synthesis approach .
- Despite using studies from 12 countries, the analytical themes developed from the review comprised a high level of conceptual thinking which could be applied across different studies.
- The review was restricted to the experiences of patients with 12 countries which could limit the generalisability of the findings.
- The qualitative studies (n = 21) in the literature were limited, so further qualitative studies are needed to assess the contributory factors leading to medicine-related problems.

1  
2  
3  
4  
5 **Contributors** AA participated in protocol development, literature searching,  
6 data extraction, data analysis, and manuscript preparation. MG participated in  
7 protocol development, data analysis, literature searching, data extraction, and  
8 manuscript preparation. HA participated in protocol development, data  
9 analysis, and manuscript preparation. ZA participated in protocol  
10 development, literature searching, data extraction, and manuscript  
11 preparation. All authors have read and approved the final manuscript.  
12  
13  
14  
15  
16

17  
18 **Funding** There are no funders for this work.  
19

20  
21 **Competing interests** None.  
22

23  
24 **Ethics approval** Systematic review.  
25  
26

27  
28 **Provenance and peer review** Not commissioned; externally peer reviewed.  
29  
30

31 **Data sharing statement** No additional data available.  
32  
33  
34  
35  
36  
37  
38  
39  
40  
41  
42  
43  
44  
45  
46  
47  
48  
49  
50  
51  
52  
53  
54  
55  
56  
57  
58  
59  
60

## INTRODUCTION

Medicine-related problems (MRPs) emerged as a concept in the early 1990s as “the detrimental experience regarding drug therapy and which potentially or actually causes an interference with their desired outcome.”[1] MRPs affect both healthcare and economic situations and contribute to a tremendous increase in morbidity, mortality and healthcare expenditure worldwide.[2-4]

MRPs represent a major issue, particularly in chronic conditions such as cardiovascular diseases (CVDs) and diabetes mellitus (DM).[5] The aforementioned conditions are expected to be the major source of morbidity by 2020.[6 7] In addition, these two conditions are interrelated; it has been documented that DM is a key factor that leads to CVDs as people with diabetes are three to four times more likely to have a CVD.[8 9] Consequently, the combination of CVDs and DM, which can result in multiple complications, represents a major concern for healthcare professionals.

More specifically, patients with CVDs and/or DM are more susceptible to MRPs due to long-term use of medicines and the inevitable polypharmacy.[7 10 11] However, many additional factors that contribute to MRPs in patients with CVDs and/or DM have gone underreported.

Studies in the literature, which investigated risk factors contributing to MRPs in patients with CVDs/DM, were mainly quantitative; only few studies were qualitative. Quantitative studies investigating risk factors contributing to MRPs involved either direct observations or were made retrospectively using data extracted from medical records.[12-15] However, most of the studies reported old age and polypharmacy extensively; few studies reported gender, depression, education, cohabitation, and immobilisations.[16] Nonetheless, qualitative studies investigating contributory risk factors leading to MRPs have been rather limited.

1  
2  
3 Therefore, this review aims to explore and evaluate contributory factors  
4 leading to MRPs among adult patients with CVDs and/or DM from their  
5 perspectives.  
6  
7

## 8 9 **METHODS**

10 We searched the PubMed, Embase, ISI Web of Knowledge, PsycInfo,  
11 International Pharmaceutical Abstract, and PsycExtra databases for entries  
12 between January 1990 and March 2014. The search strategy evaluated  
13 articles obtained predominantly through databases. Additional articles were  
14 retrieved through the bibliography lists of published reviews, where applicable.  
15  
16  
17  
18  
19

20  
21 The search strategy combined established methodological terms for  
22 qualitative research (qualitative research, qualitative studies, nursing  
23 methodological research, narrative analysis) and the following terms:  
24 Medicine (drug/medication) related problems, medicine (drug/medication) use,  
25 diabetes mellitus, cardiovascular diseases, patients' perspectives, patients'  
26 beliefs, patients' attitudes, patients' views, patients' opinions, patients'  
27 knowledge, patients' behaviours, and contributory factors. In addition, Medical  
28 Subject Headings (MeSH) relating to MRPs, CVDs/DM, risk factors, and  
29 patients' perspectives were explored.  
30  
31  
32  
33  
34  
35  
36  
37

### 38 **Study selection**

39 We included studies that utilised phone interviews, face-to-face interviews,  
40 focus groups, and open-ended questionnaires that were published in peer-  
41 reviewed journals.  
42  
43

44 The inclusion criteria involved studies focusing on the patients' perspectives  
45 on the use of medicines and MRPs and were conducted on adult patients with  
46 CVDs and/or DM.  
47  
48

49 On the other hand, the exclusion criteria flagged studies that were quantitative  
50 in nature, studies with closed-ended questionnaires, and studies focusing on  
51 conditions other than CVD/DM.  
52  
53

54 Initially, one reviewer (AA) conducted the search and did screening for the  
55 titles. At this stage, studies with irrelevant titles were excluded. Then, the  
56  
57  
58  
59  
60

1  
2  
3 abstracts of the remaining studies were evaluated independently for inclusion  
4 by two reviewers (MG and ZA). Any disagreements that were encountered  
5 were resolved via a discussion. No language limits were applied. However,  
6 the search results only generated English studies. Figure 1 demonstrate the  
7 details of the data extraction process.  
8  
9  
10

### 11 12 13 **Data synthesis and analysis**

14 In order to extract data from articles, we adopted the systematic review  
15 approach for qualitative research by Dixon-Woods et al.[17] This allowed the  
16 emergence of broad concepts. Then, data was synthesised by utilising the  
17 thematic analysis approach,[18] which enables extraction of concepts and  
18 hypotheses from multiple qualitative studies.  
19  
20  
21  
22  
23

24 Based on the extracted results, we developed textual summaries and tables.  
25 From the textual summaries and tables, we identified emerging themes which  
26 described the meaning and content of the included studies. We then  
27 inspected similarities and differences across the textual summaries in order to  
28 avoid contradiction and reduce the developed number of themes.  
29 Subsequently, we agreed on the final list of themes through discussion and  
30 consensus.  
31  
32  
33  
34  
35  
36

37 Finally, we coded the full list of papers for the presence or absence of themes.  
38 The codes were tabulated afterwards by country in order to inspect similarities  
39 and differences across countries.  
40  
41  
42  
43

44 Since our approach was qualitative, the presence of a theme in more than  
45 one paper did not indicate its importance in the studied population.[19]  
46 However, a theme appearing in more than one paper did denote to a degree  
47 its validity. Thus, the number of studies within a specific theme was reported  
48 in this review.  
49  
50  
51  
52  
53

### 54 55 **Quality of synthesis assessment**

56 The quality of papers was assessed using the checklist developed by Dixon-  
57 Woods et al. (2004).[17] This assessment was based mainly on clarity,  
58  
59  
60



1  
2  
3 consideration of ethical issues, and transferability of the sample, data, and  
4 analysis across different settings. Furthermore, the critical appraisal skills  
5 programme criteria[20] were used to rank the papers based on 10 questions  
6 that fulfilled the clarity, methods, and results of the studies. Consequently,  
7 studies were grouped into low (one star: 0 to 3 points), medium (two stars: 4  
8 to 7 points), and high quality (three stars: 8 to 10 points). Low-quality studies  
9 were not excluded, but caution was taken when interpreting their results.  
10  
11  
12  
13  
14  
15  
16  
17  
18  
19  
20  
21  
22  
23  
24  
25  
26  
27  
28  
29  
30  
31  
32  
33  
34  
35  
36  
37  
38  
39  
40  
41  
42  
43  
44  
45  
46  
47  
48  
49  
50  
51  
52  
53  
54  
55  
56  
57  
58  
59  
60

## RESULTS

A total of 21 studies (including 836 participants) from 12 countries met the inclusion criteria (Table 1) and were conducted in the following countries: Australia,[21] Brazil,[22] Cameroon,[23] Canada,[24] Croatia,[25] Ireland,[26] Malaysia,[27 28] South Africa,[29] Spain,[30] Taiwan,[31] the United Kingdom,[7 32-37] and the United States.[38-40] The majority of the studies investigated **type 2 DM** ( $n = 15$ ); fewer studies investigated CVDs. Thus, only two studies investigated hypertension (HTN), one investigated heart failure, and one studied CVDs in general. The remaining two studies investigated DM/HTN and DM/HTN/stroke, respectively. Eight studies used focus groups, 12 used interviews, and one study used a mixture of these methods. The review covered areas related to patients, conditions, and medicines.

Table 1| **Characteristics of the included studies**

| Study                   | Country  | Study type                 | Patients' diagnosis | Method of analysis | Study population                                                                                 | Study settings                                | Study aims                                                                                                                                                     | Study quality |
|-------------------------|----------|----------------------------|---------------------|--------------------|--------------------------------------------------------------------------------------------------|-----------------------------------------------|----------------------------------------------------------------------------------------------------------------------------------------------------------------|---------------|
| Al-Qazaz et al 2011[27] | Malaysia | Semi-structured interviews | <b>Type 2 DM</b>    | Content analysis   | 12 diabetic patients, with at least one year of diabetes and a prescription of oral hypoglycemic | Universiti Sains Malaysia (USM) Health Clinic | To explore diabetic patients' experience and knowledge about diabetes and its medication and to understand the factors contributing to medication adherence in | **            |

1  
2  
3  
4  
5  
6  
7  
8  
9  
10  
11  
12  
13  
14  
15  
16  
17  
18  
19  
20  
21  
22  
23  
24  
25  
26  
27  
28  
29  
30  
31  
32  
33  
34  
35  
36  
37  
38  
39  
40  
41  
42  
43  
44  
45  
46  
47  
48  
49

Malaysian population.

Brown et al 2007[32]

UK

One-to-one interviews

Type 2 DM

Thematic analysis

17 African–Caribbean diabetes patients with age above 18 years; 13 first generation immigrants and four second generation immigrants

Inner city Nottingham

To gain an understanding of how health beliefs influence the way African–Caribbean people with diabetes manage their illness.

\*\*\*

Choudhury et al 2009[33]

UK

Structured interview

Type 2 DM

Thematic analysis

14 invited individuals, Bangladeshi (four males and 10 females), in the age range of 26 to 67 years, with type 2 DM (had it since six months - 27 years) and were recruited either in Swansea or Birmingham.

Participants from local communities in Swansea and Birmingham were invited for the interview

To examine the understanding and beliefs of people with diabetes from the Bangladeshi community living in the UK.

\*\*

|    |                         |           |                      |           |                                                                                      |                                                                                                                                                 |                                                                                                                                                                   |                                                                                                                                                                              |   |
|----|-------------------------|-----------|----------------------|-----------|--------------------------------------------------------------------------------------|-------------------------------------------------------------------------------------------------------------------------------------------------|-------------------------------------------------------------------------------------------------------------------------------------------------------------------|------------------------------------------------------------------------------------------------------------------------------------------------------------------------------|---|
|    |                         |           |                      |           | Interviews were made in either English or in Sylheti as the researcher was bilingual |                                                                                                                                                 |                                                                                                                                                                   |                                                                                                                                                                              |   |
| 13 | Coronado et al 2004[38] | USA       | Focus groups         | Type 2 DM | Matrix analysis by Morgan and Krueger                                                | 42 Individuals (14 men and 28 women) in six focus groups, who had diabetes, had a family history of diabetes, or knew someone who had diabetes. | Fred Hutchinson Cancer Research Center's project office in Sunnyside, Yakima village and Skagit Valley Community College and at the Catholic church in Burlington | To investigate the perceptions about the causes of and treatments for type 2 DM                                                                                              | * |
| 24 | Cottrell et al 2013[21] | Australia | Structured interview | HF        | Repertory grid technique                                                             | 92 patients (older than 18 years) with heart failure                                                                                            | Heart Failure Service outpatient clinic, Royal Brisbane and Women's Hospital in Brisbane, Australia                                                               | To elicit individuals' beliefs about their heart failure treatment and to investigate whether generated constructs were different between adherent and nonadherent patients. | * |

1  
2  
3  
4  
5  
6  
7  
8  
9  
10  
11  
12  
13  
14  
15  
16  
17  
18  
19  
20  
21  
22  
23  
24  
25  
26  
27  
28  
29  
30  
31  
32  
33  
34  
35  
36  
37  
38  
39  
40  
41  
42  
43  
44  
45  
46  
47  
48  
49

|                       |       |                                        |     |                   |                                                                                                                                                                                                                                                                           |                                                                                                                        |                                                                                                                                                                          |    |
|-----------------------|-------|----------------------------------------|-----|-------------------|---------------------------------------------------------------------------------------------------------------------------------------------------------------------------------------------------------------------------------------------------------------------------|------------------------------------------------------------------------------------------------------------------------|--------------------------------------------------------------------------------------------------------------------------------------------------------------------------|----|
| Gascon et al 2004[30] | Spain | Focus groups with open ended questions | HTN | Thematic analysis | Seven focus groups of 44 patients (24 men and 20 women), diagnosed with hypertension, between the ages of 18 and 80 years, being treated with antihypertensives for 3 months, being non-compliant and having sufficiently good physical and mental health to participate. | Two primary healthcare centres                                                                                         | To identify factors related to non-compliance with the treatment of patients with hypertension.                                                                          | ** |
| Gordon et al 2007[7]  | UK    | Face-to-face interviews                | CVD | Thematic analysis | 98 patients (41 males and 57 females) in the age range of 32 – 89 years.                                                                                                                                                                                                  | Home interviews of patients recruited from five general surgeries and pharmacy interviews at four community pharmacies | To examine medication-related problems from the perspective of patients with a chronic condition and to identify how they may be supported in managing their medication. | ** |

|                                                                                                 |                        |     |              |            |                   |                                                                                                                                                                                                                                               |                                                            |                                                                                                                                                             |     |
|-------------------------------------------------------------------------------------------------|------------------------|-----|--------------|------------|-------------------|-----------------------------------------------------------------------------------------------------------------------------------------------------------------------------------------------------------------------------------------------|------------------------------------------------------------|-------------------------------------------------------------------------------------------------------------------------------------------------------------|-----|
| 1<br>2<br>3<br>4<br>5<br>6<br>7<br>8<br>9<br>10<br>11<br>12<br>13<br>14<br>15<br>16<br>17<br>18 | Grace et al 2008[34]   | UK  | Focus groups | Type 2 DM  | Thematic analysis | 17 focus groups of adult diabetic patients                                                                                                                                                                                                    | Tower Hamlets, a socioeconomically deprived London borough | To understand lay beliefs and attitudes, religious teachings, and professional perceptions in relation to diabetes prevention in the Bangladeshi community. | *** |
| 19<br>20<br>21<br>22<br>23<br>24<br>25<br>26<br>27<br>28<br>29<br>30<br>31<br>32<br>33<br>34    | Heymann et al 2012[35] | UK  | Focus groups | DM and HTN | Thematic analysis | 10 focus groups of 86 (42 males and 44 females) patients with hypertension in three age ranges: 41-50, 51-60, 61-70 years (six groups); and patients with hypertension and DM in the age ranges: 51-60, 61-70 years (a total of four groups). | UK                                                         | To explore beliefs and perceptions regarding hypertension and gain an understanding of barriers to treatment among patients with and without DM.            | *** |
| 35<br>36<br>37<br>38<br>39<br>40<br>41<br>42<br>43<br>44<br>45                                  | Hu et al 2013[39]      | USA | Focus groups | Type 2 DM  | Content analysis  | Five focus groups of 73 Hispanic immigrants; 18                                                                                                                                                                                               | free health clinic in central North Carolina               | To explore perceived barriers among Hispanic                                                                                                                | **  |

1  
2  
3  
4  
5  
6  
7  
8  
9  
10  
11  
12  
13  
14  
15  
16  
17  
18  
19  
20  
21  
22  
23  
24  
25  
26  
27  
28  
29  
30  
31  
32  
33  
34  
35  
36  
37  
38  
39  
40  
41  
42  
43  
44  
45  
46  
47  
48  
49

years or older

immigrants with diabetes and their family members.

|                       |          |                                      |                           |                   |                                                                                                                                                                                                                   |                                                                                      |                                                                                                                                 |     |
|-----------------------|----------|--------------------------------------|---------------------------|-------------------|-------------------------------------------------------------------------------------------------------------------------------------------------------------------------------------------------------------------|--------------------------------------------------------------------------------------|---------------------------------------------------------------------------------------------------------------------------------|-----|
| Jolles et al 2013[24] | Canada   | Semi-structured interviews           | HTN                       | Thematic analysis | 26 Patients, in the age range of 26 - 85 years and 62% females, able to speak, read and write English; diagnosed with hypertension by a healthcare provider, and currently taking an antihypertensive medication. | Two hypertension clinics at the University of Alberta in Edmonton                    | To understand hypertensive patients' perspectives regarding blood pressure and hypertension treatment.                          | **  |
| Kiawi et al 2006[23]  | Cameroon | In-depth interviews, semi-structured | Type 2 DM, HTN and stroke | Content analysis  | 15 interviews of 62 patients (27 women and five men), selection criteria included they had lived at least six months in the community, were nominated by other                                                    | Four urban health districts, one from each of the main ecological areas of Cameroon. | To investigate of lay knowledge, attitudes, and behaviors relating to diabetes and its main risk factors of urban Cameroonians. | *** |

1  
2  
3  
4  
5  
6  
7  
8  
9  
10  
11  
12  
13  
14  
15  
16  
17  
18  
19  
20  
21  
22  
23  
24  
25  
26  
27  
28  
29  
30  
31  
32  
33  
34  
35  
36  
37  
38  
39  
40  
41  
42  
43  
44  
45  
46  
47  
48  
49

|                              |          |                                              |           |                   |                                                                                                                                                                                      |                                                             |                                                                                                                                                                      |     |
|------------------------------|----------|----------------------------------------------|-----------|-------------------|--------------------------------------------------------------------------------------------------------------------------------------------------------------------------------------|-------------------------------------------------------------|----------------------------------------------------------------------------------------------------------------------------------------------------------------------|-----|
| Lai et al 2005[31]           | Taiwan   | In-depth interviews                          | Type 2 DM | Thematic analysis | community members, and were age above 15 years.<br>22 diabetic patients (12 males and 10 females), in the age range of 44 - 80 years, with a duration of illness more than one year. | Rural Taiwan community                                      | To investigate Chinese diabetic patients' perceptions about their illness and treatment strategies to facilitate patient-centred, culture-sensitive clinical skills. | **  |
| Lawton et al. 2006[36]       | UK       | In-depth interviews with open-ended approach | Type 2 DM | Thematic analysis | 31 patients (23 Pakistani and eight Indian), aged 18 years and over, and diagnosed with type 2 DM                                                                                    | General Practices in Edinburgh                              | Patients' perception and practical considerations                                                                                                                    | **  |
| Mohd Ali and Jusoff 2009[28] | Malaysia | In-depth open-ended interviews               | Type 2 DM | Thematic analysis | 18 patients (9 males and 9 females) in the age of 15-75 years, and 13 healthcare professionals (nine doctors, three                                                                  | Endocrinology clinic of a teaching hospital in Kuala Lumpur | To explore the perspectives and experiences of Malay patients in managing type 2 DM as a chronic illness and provide                                                 | *** |



1  
2  
3  
4  
5  
6  
7  
8  
9  
10  
11  
12  
13  
14  
15  
16  
17  
18  
19  
20  
21  
22  
23  
24  
25  
26  
27  
28  
29  
30  
31  
32  
33  
34  
35  
36  
37  
38  
39  
40  
41  
42  
43  
44  
45  
46  
47  
48  
49

pharmacists  
and  
one diabetic  
nurse  
educator).

recommenda-  
tions that aim to  
enhance  
adherence to  
treatment and  
help patients to  
improve their  
self-  
management  
skills.

|                          |              |                                                                                                                                       |           |                   |                                                                                                                     |                                                         |                                                                                                                                                                                              |     |
|--------------------------|--------------|---------------------------------------------------------------------------------------------------------------------------------------|-----------|-------------------|---------------------------------------------------------------------------------------------------------------------|---------------------------------------------------------|----------------------------------------------------------------------------------------------------------------------------------------------------------------------------------------------|-----|
| Mshunqane et al 2012[29] | South Africa | Patient focus groups (n = 10) and healthcare professional focus groups (n = 8) and in-depth interviews. The questions were open-ended | Type 2 DM | Thematic analysis | Patients who had been diagnosed with type 2 diabetes for at least one year, who were between 30 and 65 years of age | Dr George Mukhari Hospital outpatients' diabetes clinic | To determine the knowledge that patients with type 2 DM have about the management of their disease, as well as the perceptions of the health care team about the services given to patients. | *** |
| Peel et al 2004[37]      | UK           | In-depth interviews                                                                                                                   | Type 2 DM | Thematic analysis | 40 newly diagnosed TYPE 2 DIABETES MELLITUS patients in the age range of 21 – 77 years                              | Across the Lothian region in Scotland                   | To explore the patients' emotional reactions about their type 2 DM diagnosis, and their views about information provision at the time of                                                     | **  |

diagnosis.

|    |                         |         |              |           |                   |                                                                                                                                                       |                                                                                         |                                                                                                                                        |    |
|----|-------------------------|---------|--------------|-----------|-------------------|-------------------------------------------------------------------------------------------------------------------------------------------------------|-----------------------------------------------------------------------------------------|----------------------------------------------------------------------------------------------------------------------------------------|----|
| 1  |                         |         |              |           |                   |                                                                                                                                                       |                                                                                         |                                                                                                                                        |    |
| 2  |                         |         |              |           |                   |                                                                                                                                                       |                                                                                         |                                                                                                                                        |    |
| 3  |                         |         |              |           |                   |                                                                                                                                                       |                                                                                         |                                                                                                                                        |    |
| 4  |                         |         |              |           |                   |                                                                                                                                                       |                                                                                         |                                                                                                                                        |    |
| 5  |                         |         |              |           |                   |                                                                                                                                                       |                                                                                         |                                                                                                                                        |    |
| 6  |                         |         |              |           |                   |                                                                                                                                                       |                                                                                         |                                                                                                                                        |    |
| 7  |                         |         |              |           |                   |                                                                                                                                                       |                                                                                         |                                                                                                                                        |    |
| 8  |                         |         |              |           |                   |                                                                                                                                                       |                                                                                         |                                                                                                                                        |    |
| 9  |                         |         |              |           |                   |                                                                                                                                                       |                                                                                         |                                                                                                                                        |    |
| 10 |                         |         |              |           |                   |                                                                                                                                                       |                                                                                         |                                                                                                                                        |    |
| 11 | Peres et al 2007[22]    | Brazil  | Interviews   | Type 2 DM | Content analysis  | 24 diabetic females, age between 25 and 76 years old, literate, with eight years of schooling, from Ribeirão Preto, who perform household activities. | Nursing Education Center for Adults and Elderly - CEEAI, University of São Paulo        | Identify the difficulties patients encounter when controlling diabetes                                                                 | ** |
| 12 |                         |         |              |           |                   |                                                                                                                                                       |                                                                                         |                                                                                                                                        |    |
| 13 |                         |         |              |           |                   |                                                                                                                                                       |                                                                                         |                                                                                                                                        |    |
| 14 |                         |         |              |           |                   |                                                                                                                                                       |                                                                                         |                                                                                                                                        |    |
| 15 |                         |         |              |           |                   |                                                                                                                                                       |                                                                                         |                                                                                                                                        |    |
| 16 |                         |         |              |           |                   |                                                                                                                                                       |                                                                                         |                                                                                                                                        |    |
| 17 |                         |         |              |           |                   |                                                                                                                                                       |                                                                                         |                                                                                                                                        |    |
| 18 |                         |         |              |           |                   |                                                                                                                                                       |                                                                                         |                                                                                                                                        |    |
| 19 |                         |         |              |           |                   |                                                                                                                                                       |                                                                                         |                                                                                                                                        |    |
| 20 |                         |         |              |           |                   |                                                                                                                                                       |                                                                                         |                                                                                                                                        |    |
| 21 |                         |         |              |           |                   |                                                                                                                                                       |                                                                                         |                                                                                                                                        |    |
| 22 |                         |         |              |           |                   |                                                                                                                                                       |                                                                                         |                                                                                                                                        |    |
| 23 | Rustveld et al 2009[40] | USA     | Focus groups | Type 2 DM | Thematic analysis | 34 patients in six focus groups (three in English and three in Spanish), older than 18 years and with type 2 DM                                       | Three Harris County Hospital District (HCHD) community health centers in Houston, Texas | To elicit attitudes, attributions, and self-efficacy related to diabetes self-care in both English- and Spanish-speaking Hispanic men. | ** |
| 24 |                         |         |              |           |                   |                                                                                                                                                       |                                                                                         |                                                                                                                                        |    |
| 25 |                         |         |              |           |                   |                                                                                                                                                       |                                                                                         |                                                                                                                                        |    |
| 26 |                         |         |              |           |                   |                                                                                                                                                       |                                                                                         |                                                                                                                                        |    |
| 27 |                         |         |              |           |                   |                                                                                                                                                       |                                                                                         |                                                                                                                                        |    |
| 28 |                         |         |              |           |                   |                                                                                                                                                       |                                                                                         |                                                                                                                                        |    |
| 29 |                         |         |              |           |                   |                                                                                                                                                       |                                                                                         |                                                                                                                                        |    |
| 30 |                         |         |              |           |                   |                                                                                                                                                       |                                                                                         |                                                                                                                                        |    |
| 31 |                         |         |              |           |                   |                                                                                                                                                       |                                                                                         |                                                                                                                                        |    |
| 32 |                         |         |              |           |                   |                                                                                                                                                       |                                                                                         |                                                                                                                                        |    |
| 33 | Smith et al 2003[26]    | Ireland | Focus groups | Type 2 DM | Thematic analysis | 25 patients from three general practices, having DM for at least one year                                                                             | Patients were invited to participate in the focus group                                 | To explore the views and health beliefs of patients with type 2 DM who had experienced                                                 | ** |
| 34 |                         |         |              |           |                   |                                                                                                                                                       |                                                                                         |                                                                                                                                        |    |
| 35 |                         |         |              |           |                   |                                                                                                                                                       |                                                                                         |                                                                                                                                        |    |
| 36 |                         |         |              |           |                   |                                                                                                                                                       |                                                                                         |                                                                                                                                        |    |
| 37 |                         |         |              |           |                   |                                                                                                                                                       |                                                                                         |                                                                                                                                        |    |
| 38 |                         |         |              |           |                   |                                                                                                                                                       |                                                                                         |                                                                                                                                        |    |
| 39 |                         |         |              |           |                   |                                                                                                                                                       |                                                                                         |                                                                                                                                        |    |
| 40 |                         |         |              |           |                   |                                                                                                                                                       |                                                                                         |                                                                                                                                        |    |
| 41 |                         |         |              |           |                   |                                                                                                                                                       |                                                                                         |                                                                                                                                        |    |
| 42 |                         |         |              |           |                   |                                                                                                                                                       |                                                                                         |                                                                                                                                        |    |
| 43 |                         |         |              |           |                   |                                                                                                                                                       |                                                                                         |                                                                                                                                        |    |
| 44 |                         |         |              |           |                   |                                                                                                                                                       |                                                                                         |                                                                                                                                        |    |
| 45 |                         |         |              |           |                   |                                                                                                                                                       |                                                                                         |                                                                                                                                        |    |
| 46 |                         |         |              |           |                   |                                                                                                                                                       |                                                                                         |                                                                                                                                        |    |
| 47 |                         |         |              |           |                   |                                                                                                                                                       |                                                                                         |                                                                                                                                        |    |
| 48 |                         |         |              |           |                   |                                                                                                                                                       |                                                                                         |                                                                                                                                        |    |
| 49 |                         |         |              |           |                   |                                                                                                                                                       |                                                                                         |                                                                                                                                        |    |

1  
2  
3  
4  
5  
6  
7  
8  
9  
10  
11  
12  
13  
14  
15  
16  
17  
18  
19  
20  
21  
22  
23  
24  
25  
26  
27  
28  
29  
30  
31  
32  
33  
34  
35  
36  
37  
38  
39  
40  
41  
42  
43  
44  
45  
46  
47  
48  
49

a new structured diabetes shared care service.

---

|                                |         |              |           |                   |                                                                                                                                                                                                                                                         |                       |                                                                                                                                                                                                                              |     |
|--------------------------------|---------|--------------|-----------|-------------------|---------------------------------------------------------------------------------------------------------------------------------------------------------------------------------------------------------------------------------------------------------|-----------------------|------------------------------------------------------------------------------------------------------------------------------------------------------------------------------------------------------------------------------|-----|
| Vinter-Repalust et al 2004[25] | Croatia | Focus groups | Type 2 DM | Thematic analysis | Seven focus groups of 49 patients (22 males and 27 females), in the age range of 44 - 83 years, ambulatory patients with the diagnosis of type 2 DM, with differences not only in age and sex, but also in the method of treatment of diabetes as well. | Zagreb Medical School | To explore type 2 diabetic patients' attitudes, thoughts, and fears connected with their illness; their expectations of the health care system; and the problems they encountered while adhering to the therapeutic regimen. | *** |
|--------------------------------|---------|--------------|-----------|-------------------|---------------------------------------------------------------------------------------------------------------------------------------------------------------------------------------------------------------------------------------------------------|-----------------------|------------------------------------------------------------------------------------------------------------------------------------------------------------------------------------------------------------------------------|-----|

---

## Narrative synthesis

The main findings of the review showed that contributory factors to MRPs involved three themes: patient-related (socioeconomic and lifestyle), medicine-related, and condition-related factors. Table 2 lists the studies that reported or discussed each theme.

| Theme/ Sub-theme                                      | Countries, studies                                                                                                                                                                                                                                                                                                                                                                                                                                     |
|-------------------------------------------------------|--------------------------------------------------------------------------------------------------------------------------------------------------------------------------------------------------------------------------------------------------------------------------------------------------------------------------------------------------------------------------------------------------------------------------------------------------------|
| <b><i>Patient related factors (socioeconomic)</i></b> |                                                                                                                                                                                                                                                                                                                                                                                                                                                        |
| Belief                                                | UK (Brown et al 2007[32], Grace et al 2008[34], Lawton et al 2006[36])                                                                                                                                                                                                                                                                                                                                                                                 |
| Family history of condition                           | UK (Grace et al 2008[34], Lawton et al 2006[36]), USA (Coronado et al 2004[38])                                                                                                                                                                                                                                                                                                                                                                        |
| Feeling victimised                                    | South Africa (Mshunqane et al 2012[29]), Croatia (Vinter-Repalust et al 2004[25]), Ireland (Smith et al 2002[26])                                                                                                                                                                                                                                                                                                                                      |
| Lack of finance                                       | Ireland (Smith et al 2002[26]), South Africa (Mshunqane et al 2012[29]), Croatia (Vinter-Repalust et al 2004[25]), USA (Hu et al 2013[39])                                                                                                                                                                                                                                                                                                             |
| Lack of knowledge                                     | Croatia (Vinter-Repalust et al 2004[25])                                                                                                                                                                                                                                                                                                                                                                                                               |
| Lack of motivation                                    | Croatia (Vinter-Repalust et al 2004[25])                                                                                                                                                                                                                                                                                                                                                                                                               |
| Lack of information/ understanding from doctors       | UK (Brown et al 2007[32], Choudhury et al 2009[33])                                                                                                                                                                                                                                                                                                                                                                                                    |
| Low self-esteem                                       | Croatia (Vinter-Repalust et al 2004[25]), USA (Rustveld et al 2009[40])                                                                                                                                                                                                                                                                                                                                                                                |
| <b><i>Patient related factors (life-style)</i></b>    |                                                                                                                                                                                                                                                                                                                                                                                                                                                        |
| Decrease alcohol intake                               | Canada (Jolles et al 2013[24]),                                                                                                                                                                                                                                                                                                                                                                                                                        |
| Decrease caffeine intake                              | Canada (Jolles et al 2013[24]), South Africa (Mshunqane et al 2012[29])                                                                                                                                                                                                                                                                                                                                                                                |
| Diet                                                  | Australia (Cotrell et al 2013[21]), Brazil (Peres et al 2007[22]), Canada (Jolles et al 2013[24]), Croatia (Vinter-Repalust et al 2004[25]), Ireland (Smith et al 2002[26]), UK (Brown et al 2007[32], Choudhury et al 2009[33], Grace et al 2008[34], Heymann et al 2012[35], Lawton et al 2006[36]), USA (Coronado et al 2004[38], Hu et al 2013[39], Rustveld et al 2009[40]), South Africa (Mshunqane et al 2012[29]), Taiwan (Lai et al 2005[31]) |
| Lack of exercise                                      | Brazil (Peres et al 2007[22]), Canada (Jolles et al 2013[24]), UK (Brown et al 2007[32], Choudhury et al 2009[33], Grace et al 2008[34], Heymann et al 2012[35], Lawton et al 2006[36]), South Africa (Mshunqane et al 2012[29]), USA (Coronado et al 2004[38], Hu et al 2013[39], Rustveld et al 2009[40])                                                                                                                                            |
| Lack of time to see doctor                            | Malaysia (Al-Qazaz et al 2011[27])                                                                                                                                                                                                                                                                                                                                                                                                                     |

|                                                              |                                                                                                                                                                                                                                                                                                                                                          |
|--------------------------------------------------------------|----------------------------------------------------------------------------------------------------------------------------------------------------------------------------------------------------------------------------------------------------------------------------------------------------------------------------------------------------------|
| Obesity                                                      | Brazil (Peres et al 2007[22]),<br>South Africa (Mshunqane et al 2012[29]),<br>UK (Brown et al 2007[32]), USA (Coronado et al<br>2004[38])                                                                                                                                                                                                                |
| Smoking                                                      | Canada (Jolles et al 2013[24]),<br>UK ( Heymann et al 2012[35])                                                                                                                                                                                                                                                                                          |
| Stress                                                       | Ireland (Smith et al 2002[26]),<br>UK ( Brown et al, 2007[32], Grace et al 2008[34],<br>Heymann et al 2012[35]), USA (Coronado et al<br>2004[38])                                                                                                                                                                                                        |
| <b>Medicine related factors</b>                              |                                                                                                                                                                                                                                                                                                                                                          |
| Belief in natural remedies as<br>alternative to medicines    | Spain (Gascon et al 2004[30]),<br>UK (Brown et al 2007[32]), USA (Coronado et al<br>2004[38])                                                                                                                                                                                                                                                            |
| Difficulty/ refusal to take<br>medicine                      | Brazil (Peres et al 2007[22]),<br>Croatia (Vinter-Repalust et al 2004[25])                                                                                                                                                                                                                                                                               |
| Fear of being stuck with<br>medicines all life               | Spain (Gascon et al 2004[30]),<br>UK (Gordon et al 2007[7])                                                                                                                                                                                                                                                                                              |
| Fear of side effects                                         | Ireland (Smith et al 2002[26]), Malaysia (Al-Qazaz<br>et al 2011[27]), UK ( Heymann et al 2012[35]),<br>Spain (Gascon et al 2004[30]), Taiwan (Lai et al<br>2005[31])                                                                                                                                                                                    |
| Fear of the chemical nature<br>of medicines                  | Taiwan (Lai et al 2005[31]), UK (Brown et al<br>2007[32])                                                                                                                                                                                                                                                                                                |
| Forgetfulness                                                | Brazil (Peres et al 2007[22]), Malaysia (Al-Qazaz et<br>al 2011[27], Mohd Ali and Jusoff 2009[28]), Spain<br>(Gascon et al 2004[30])                                                                                                                                                                                                                     |
| Lack of belief in medicines                                  | Australia (Cotrell et al 2013[21])                                                                                                                                                                                                                                                                                                                       |
| Lack of knowledge about<br>medicines mechanism of<br>actions | Canada (Jolles et al 2013[24]),<br>Spain (Gascon et al 2004[30]), UK (Gordon et al<br>2007[7])                                                                                                                                                                                                                                                           |
| Non-adherence                                                | Canada (Jolles et al 2013[24]), Croatia (Vinter-<br>Repalust et al 2004[25]), Taiwan (Lai et al<br>2005[31]), UK (Gordon et al 2007[7]), USA (Hu et al<br>2013[39], Rustveld et al 2009[40])                                                                                                                                                             |
| Polypharmacy                                                 | Brazil (Peres et al 2007[22])                                                                                                                                                                                                                                                                                                                            |
| <b>Condition related factors</b>                             |                                                                                                                                                                                                                                                                                                                                                          |
| Lack of control over condition                               | Brazil (Peres et al 2007[22]), Ireland (Smith et al<br>2002[26])                                                                                                                                                                                                                                                                                         |
| Lack of knowledge/<br>understanding<br>of condition          | Australia (Cotrell et al 2013[21]), Cameroon (Kiawi<br>et al 2006[23]), Canada (Jolles et al 2013[24]),<br>Malaysia (Al-Qazaz et al 2011[27], Mohd Ali and<br>Jusoff 2009[28]), Spain (Gascon et al 2004[30]), UK<br>(Brown et al 2007[32], Choudhury et al 2009[33],<br>Heymann et al 2012[35], Peele et al 2004[37]), USA<br>(Coronado et al 2004[38]) |
| Fear of condition, its causes<br>and complications           | South Africa (Mshunqane et al 2012[29]),<br>UK (Choudhury et al 2009[33], Lawton et al<br>2006[36]), USA (Coronado et al 2004[38])                                                                                                                                                                                                                       |
| Stress from condition                                        | Croatia (Vinter-Repalust et al 2004[25])                                                                                                                                                                                                                                                                                                                 |

## Patient-related factors

### *Socioeconomic-related factors*

Patients from six countries reported socioeconomic factors leading to MRPs in both DM and CVDs, including: beliefs, family history of the condition, poor finances, relationships with healthcare professionals (lack of communication and not enough education), inadequate knowledge, and low self-esteem (Table 2).

Beliefs regarding CVDs/DM were reported as a problem in three studies from the United Kingdom.[32 34 36] Patients perceived that DM was given by God and higher powers had control over their condition. One patient reported:

*“God has given me this disease of sugar. Whatever happens, it happens because God wants it to happen.”*

Moreover, a family history of DM was reported in three studies from the United Kingdom[34 36] and the United States.[38]

In addition, poor finances were reported by patients in four studies from Ireland,[26] South Africa,[29] Croatia,[25] and the United States.[39] A lack of necessary finances prevents patients from buying the appropriate food (for their diet)[29] and going to doctors.[26]

Consequently, the financial situation implicated the relationship of the patients with the healthcare professionals. Patients have reported that they were not getting value for their money from healthcare providers.[26] For instance, one patient reported:

*“I don’t mind paying when I’m sick, but it’s very expensive to pay the GP when I’m only getting a check-up with the nurse.”*

Thus, the patients felt victimised by healthcare professionals[25 26 29] and reported a lack of communication with healthcare professionals.[18] They

1  
2  
3 described doctors as either too busy to see them[26 27] or not giving enough  
4 information about diagnosis and medicines.[32 33 37] Other patients reported  
5 having been belittled by doctors.[25] In another study, patients accounted for  
6 the lack of communication with healthcare professionals by language  
7 barriers.[33]  
8  
9

10  
11  
12  
13 Subsequently, patients reported a lack of knowledge as a major cause for  
14 type 2 DM.[25] This situation led to the lack of motivation about their disease  
15 and affected the intake of medicines. Patients asserted the need for further  
16 education and training about their condition.  
17  
18  
19

20  
21 A lack of knowledge resulted in the patients' low-self esteem towards their  
22 condition.[25 40] Hence, patients felt unaccepted socially, less comfortable  
23 with their colleagues, and less worthy for being diabetic.[25 40]  
24  
25  
26

#### 27 *Lifestyle-related factors*

28  
29 Lifestyle-factors were reported in studies from 11 countries and included: diet  
30 (excessive alcohol/caffeine intake), lack of exercise, lack of time to see the  
31 doctor, obesity, smoking, and stress.  
32  
33  
34

35  
36 Diet was a major issue stated in 16 studies (Table 2). In this respect, patients  
37 had different behaviours towards their diet. For instance, one group of  
38 patients admitted the importance of a healthy diet, yet could not control their  
39 diets.[22 31-33] Thus, one participant reported:[22]  
40  
41  
42

43  
44 *“Regarding the diet, I try to fight so as not to eat*  
45 *certain foods, but sometimes I can't help myself.”*  
46  
47  
48

49  
50 In this respect, patients appreciated the importance of a healthy diet in  
51 controlling DM,[32] yet overestimated its importance to be beyond  
52 medicines.[31] They were also aware that a poor diet, including excess  
53 alcohol[24] and caffeine intake,[24 29] exacerbated their conditions. Another  
54 group of patients misunderstood the concept of a healthy diet. They believed  
55 that eating bitter foods could control DM[33] or applied portion sizes to their  
56  
57  
58  
59  
60

1  
2  
3 diets.[40] In the latter case, patients had difficulty eating smaller portions  
4 and/or even changing their favourite foods. On other occasions, patients  
5 claimed that diet quality was responsible for DM.[26]  
6  
7

8  
9  
10 In addition, a lack of exercise was reported in 11 studies from five countries,  
11 including Brazil,[22] Canada,[24] the United Kingdom,[32-36] South Africa,[29]  
12 and the United States.[38-40] A group of patients overestimated the  
13 importance of exercise, claiming that it can cure any existing disease.[31]  
14 Patients reported difficulty exercising although they were aware of its  
15 importance.[36 40] They justified their work, travel, stress, the weather, and  
16 lack of time as the reasons behind their decreased physical exercise.[22 33  
17 34 36 39] A lack of time was more reported in females whose culture  
18 expected them to stay indoors after they got married.[36]  
19  
20  
21  
22  
23

24  
25  
26 Moreover, obesity was described in four studies (Brazil, [22] South Africa,[29]  
27 the United Kingdom,[32] and the United States[38]) as a cause of DM.  
28 Patients blamed weight gain as the cause for their increase in blood glucose  
29 level and diabetic complications.[32 38] Moreover, they attributed insulin as  
30 one of the causes of obesity.[32]  
31  
32  
33  
34  
35

36 Stress emerged in five studies from three countries, including Ireland,[26] the  
37 United Kingdom,[32 34 35] and the United States.[38] Stress was identified as  
38 a result of changes in culture and climate, poor housing, and migration of  
39 ethnic minorities.[38] Patients considered stress to be major cause of their  
40 condition.[26 32 34 35 38 40] For instance, one patient reported:  
41  
42  
43  
44  
45

46 *"In 1998, my mother died, and I was unable to go to the funeral. During these*  
47 *months, I developed diabetes."*  
48  
49

50  
51 Patients also perceived that stress control could be an effective way to cure  
52 their condition[34] since stress led to a poor diet, smoking, and a lack of  
53 exercise.  
54  
55  
56

### 57 **Medicine-related factors**

58  
59  
60



1  
2  
3 Medicine-related factors were found in 14 studies from 11 countries and  
4 included two types of factors: factors related to the use of medicines and  
5 factors related to knowledge about medicines.  
6  
7

8  
9 Factors related to the use of medicines included medicine non-adherence and  
10 polypharmacy. Medicine non-adherence was reported in 10 studies from  
11 seven countries, including Brazil,[22] Canada,[24] Croatia,[25] Malaysia,[27  
12 28] Spain,[30] Taiwan,[31] the United Kingdom,[7] and the United States.[39  
13 40] Patients justified non-adherence to medicines as difficulty following the  
14 treatment regimen,[25] depression and stress,[40] forgetfulness in taking the  
15 medicines,[7 22 27 28 30] a lack of routine in taking the medicines,[24]  
16 changes in medicine routines,[24] and the inconvenience of taking insulin. For  
17 instance, patients complained that oral hypoglycemics are more convenient to  
18 take than insulin:[30]  
19  
20  
21  
22  
23  
24  
25  
26  
27

28 *“I prefer pills more than insulin. You know, swallowing a pill causes no pain.*  
29 *And when I know I will eat more I just take another pill or an extra half.”*  
30  
31

32  
33 Furthermore, intentional non-adherence was reported in some studies where  
34 patients changed their insulin doses depending on their food regimen.[30] In  
35 another scenario, patients stopped taking their medicines when they  
36 exercised, acting on the assumption that exercise reduces blood sugar level.  
37 Thus, patients changed the dose/regimen of their medicines to fit with their  
38 daily activities.[7]  
39  
40  
41  
42  
43

44 Polypharmacy was reported among patients with **type 2 DM** in two studies  
45 from Brazil[22] and Canada.[28] Polypharmacy caused inconvenience in  
46 taking medicines:[22]  
47  
48  
49  
50

51 *“Medication: this has been my biggest problem in*  
52 *this current phase. I take medication for blood pressure,*  
53 *circulation, diabetes, vitamins. I used to mix up the time of*  
54 *each, but today, thanks to orientation, I’m overcoming this*  
55 *stage.”*  
56  
57  
58  
59  
60

1  
2  
3  
4  
5 Factors relating to knowledge about medicines included lack of knowledge  
6 about how the medicines worked, fear of the chemical nature of medicines  
7 and their side effects, and a lack of belief in medicine.  
8

9  
10  
11 The lack of knowledge about how medicines worked was described in three  
12 studies in Canada,[24] the United Kingdom,[7] and Spain.[30] Patients could  
13 not identify most of their medicines apart from the diuretics, which they called  
14 “water pills.”[24] Moreover, patients could not understand how their medicines  
15 worked, even when they read the patient information leaflet.[30]  
16  
17  
18

19  
20  
21 This lack of knowledge created fear in patients regarding the chemical nature  
22 of medicines, the side effects of medicines, and being obliged to take  
23 medicines all of their lives.[7 26 27 30-32 35] For instance, patients referred to  
24 oral hypoglycemic agents and insulin as “pharmaceutical toxins.”[31]  
25  
26  
27

28  
29  
30 Additionally, patients were afraid of the side effects and complications of  
31 medicines. They attributed various side effects to medicines, including  
32 hypoglycemia and gastrointestinal disturbances to insulin,[32] kidney failure to  
33 oral hypoglycemic agents,[31] and nausea/vomiting to antihypertensive  
34 agents.[30] In the last case, a patient reported:  
35  
36  
37

38  
39  
40 *“I don’t like them (medicines); they have lots of side*  
41 *effects. They can make you sick... I think that I might*  
42 *get worse instead of better.”*  
43  
44  
45

46  
47 These fears promoted a lack of belief in medicines among patients.[21]  
48 Subsequently, patients started to believe in natural remedies as an alternative  
49 to medicines.[30 32 38] They referred to natural therapies as “a cure” that  
50 should be used alongside traditional medicines.[38] In another scenario,  
51 patients believed that natural therapies were superior to medicines.[32] In this  
52 respect, natural therapies reported for curing DM included natural drinks  
53 (composed of minerals and water);[38] and plant products (such as aloe vera,  
54 arnica, cactus, silk cottonwood tree, tree spinach, and violet water).[32]  
55  
56  
57  
58  
59  
60

### **Condition-related factors**

Condition (clinical)-related factors were reported from 11 countries as a major theme. Factors included a lack of knowledge/understanding of the condition, fear of the condition and its complications, stress from the condition, and a lack of control over the condition.

Lack of knowledge/understanding of the condition (CVDs/DM) emerged as a major theme in 11 studies from seven countries, including Australia,[21] Cameroon,[23] Canada,[24] Malaysia,[27 28] Spain,[30] the United Kingdom,[32 33 35 37] and the United States.[38]

For CVDs, patients expressed a lack of knowledge about their heart failure, hypertension, and stroke. Patients with heart failure did not know enough about their disease symptoms.[21] Moreover, hypertensive patients did not understand the nature of their disease,[28 30] struggled to define their condition,[24] and considered it an underlying risk factor to myocardial infarction rather than a disease.[35] Patients justified their lack of knowledge by citing short consultations with physicians, not obtaining enough information from physicians, and obtaining information from non-medical sources such as television and magazines. For instance, one patient reported:

*“Anything I know about blood pressure I’ve read in books, the doctor tells me absolutely nothing . . . High blood pressure: factors related to compliance with treatment 127. I want him to tell me where high blood pressure comes from.”*

Similarly, patients with DM lacked knowledge about the disease and misunderstood its causes and complications.[23 25 27 29 32 33 36] Regarding the DM condition and causes, patients’ perceptions of DM were influenced by other people’s accounts and experiences.[32] Patients viewed the condition as an illness that took away their health and strength[36] and changed their lifestyle.[25] They could not differentiate between DMT1 and **type 2 DM**,[27] considered high sugar intake to be the cause of DM, and

1  
2  
3 perceived DM to be sexually and genetically transmitted.[23 33] Moreover,  
4 patients believed that diabetes was not dangerous if it did not require  
5 insulin.[32] Patients were only aware of the microvascular complications (such  
6 as foot disease) of DM.[26] Moreover, they were aware of the disease's signs  
7 and symptoms (such as dry mouth, tiredness, dizziness, irritation, blurred  
8 vision, micturition, and extreme thirst) only after they encountered them.[28  
9 38]

10  
11  
12  
13  
14  
15  
16 The lack of knowledge about the condition created fear in the patients' minds  
17 of the disease itself[38] and they could not accept the disease easily.[25 33]  
18 One patient reported:[38]

19  
20  
21  
22  
23 *"Diabetes is a disease that kills you little by little."*

24  
25  
26 Diseases additionally resulted in stress about the condition that was  
27 particularly observed in patients with multiple comorbidities.[36] For instance,  
28 diabetic patients who had asthma as a comorbidity could not exercise due to  
29 asthma symptoms, such as shortness of breath and swollen feet and joints:  
30  
31  
32

33  
34  
35 *"They tell you to exercise...*

36 *but I can't move around a lot because I have*  
37 *a problem with my leg (arthritis). If I walk a little,*  
38 *then it swells up."*  
39  
40  
41  
42

43 As a result, patients were not able to control their condition,[22 26] which led  
44 to frustration, depression, and anxiety.  
45  
46  
47

## 48 49 **DISCUSSION**

50  
51  
52 To our knowledge, this review is the first systematic analysis of the  
53 perspectives of adult patients with CVDs/DM on contributory factors leading to  
54 MRPs. We explored the patients' knowledge, beliefs, and behaviours towards  
55 medicines. The majority of studies evaluated patients with DM; only a few  
56  
57  
58  
59  
60

1  
2  
3 studies evaluated patients with CVDs. The three themes emerging from this  
4 review included: patient- (socioeconomic- and lifestyle-), clinical-, and  
5 medicine-related factors.  
6  
7

## 8 9 10 **Patient-related factors**

### 11 *Socioeconomic-related factors*

12 Socioeconomic factors (genetic, cultural behaviour, and financial situations)  
13 affected the patients' perceptions of disease and the medicines contributing to  
14 MRPs. Patients perceived genetic factors and religious beliefs to be the cause  
15 of their DM.[19 21] Patients from both Christian and Muslim backgrounds  
16 named God as the cause for their DM. These attitudes were confirmed by  
17 other studies that showed that religious values contributed to MRPs.[41 42] In  
18 addition, patients felt socially for their DM, which affected their self-esteem.  
19 They also blamed their financial situation for contributing to MRPs, since their  
20 finances prevented them from having the right diet and being able to afford  
21 doctors' visits. The cost of therapy has been perceived as being important,  
22 particularly with chronic conditions such as CVDs.[43] Thus, the value that the  
23 patients receive from healthcare professionals for their money was  
24 unsatisfactory. In fact, doctors' attitudes towards the patients played an  
25 important role in the patients being compliant with their regimens.[44] This  
26 problem was significant in ethnic minorities where a lack of communication  
27 between doctors and patients lead to misunderstanding.[41] Patients  
28 confirmed the need for further information and training, emphasising the  
29 importance of getting information from healthcare professionals.  
30  
31  
32  
33  
34  
35  
36  
37  
38  
39  
40  
41  
42  
43  
44

### 45 *Lifestyle-related factors*

46 Lifestyle factors were perceived as a vital component for the control of  
47 conditions (CVDs/DM). Patients felt that they needed to adjust their diet,  
48 engage in physical activity, and manage their moods to cope with conditions.  
49 In relation to diet, they either did not understand the concept of a healthy diet  
50 or they had difficulty managing a good diet. Thus, some patients assumed  
51 that a healthy diet meant eating less food, eating "bitter food," or eating  
52 "natural food." Other patients overestimated the importance of diet as being  
53 more crucial than medicines. This overestimation can be attributed to the fact  
54  
55  
56  
57  
58  
59  
60

1  
2  
3 that the frequency of meals could serve as a reminder to take medicines.[43]  
4 In addition, patients were aware of the necessity of physical exercise but  
5 blamed the weather, work, lack of time, and stress for their not exercising.[43]  
6 Stress was a major factor that patients blamed for not taking medicines on  
7 time and eating a poor diet.  
8  
9  
10

### 11 12 13 **Medicine-related factors**

14 Medicines were recognised by patients as a contributing factor to MRPs with  
15 regards to lack of knowledge about medicines, lack of belief that medicines  
16 are good, difficulty taking medicines on time, and fear of side effects. Patients  
17 reported a lack of knowledge about how the medicines worked, called them  
18 pharmaceutical toxins, and preferred herbal remedies to medicines. This point  
19 was emphasised in another study[41] that stated that the patients' lack of  
20 awareness about the use of their medicines led to MRPs. Furthermore,  
21 patients reported skipping medicines doses due to forgetfulness or they did  
22 not take their medicines on purpose (at the time of exercise). Forgetfulness in  
23 terms of taking medicines was observed more often in patients who did not  
24 have regular meals.[43] At other times, patients were scared of the side  
25 effects and complications of medicines. The medicines' side effects caused  
26 physical discomfort for patients, who started to doubt the therapy's  
27 effectiveness and skipped their medicines.[43]  
28  
29  
30  
31  
32  
33  
34  
35  
36  
37  
38  
39

### 40 **Condition-related factors**

41 Condition (clinical) factors reported by the patients revealed a lack of  
42 knowledge about the disease and its cause, a lack of control over the disease,  
43 and the existence of comorbidities with the disease.[43] Patients were  
44 accordingly not fully aware of their condition and perceived it in most cases as  
45 being a risk factor leading to other diseases. Moreover, they misidentified the  
46 causes and complications of their condition. Once the education about the  
47 condition was provided, patients felt scared and frustrated, which induced a  
48 lack of control over the disease. Moreover, the existence of comorbidities with  
49 the main condition worsened the patients' adherence to treatment and advice.  
50  
51  
52  
53  
54  
55  
56  
57  
58  
59  
60

### Strengths and weaknesses of the review

This review proposes a systematic and comprehensive approach to qualitative studies of contributory factors to MRPs of adult patients with CVDs/DM. We adopted a thematic synthesis approach to eligible studies regarding the treatment experiences from patients' perspectives. The studies involved 836 participants. However, despite the diversity of the participants and different contexts in the studies, we were able to develop themes that indicated an overlap among the studies.

We used recognised methods from the literature regarding patients' experiences/perspectives in order to synthesise and develop analytical themes.[18 45] We included the details of each study in relation to the aims, participants, settings, and methods applied. We rated the studies' qualities based on methods from the literature. In this respect, we found that studies with the highest ratings contributed most to the final analytical themes.

One limitation of the review is that it was restricted to the experiences of the patients involved in the studies. Moreover, perspectives and beliefs of non-English speaking patients and those seeking palliative care were not integrated in this review due to lack of studies representing them. Thus, the review was extracted from studies in 12 countries only. Therefore, the generalisability of the findings of this review to patients from different countries (other than the 12 aforementioned countries) may be difficult. However, the analytical themes developed offer a high level of conceptual thinking that can be applied across different contexts.

### Implications of the research

This review examined the contribution of patients' perceptions, behaviours, and beliefs in understanding different aspects of underlying risk factors that may lead to MRPs. Syntheses of the qualitative research on such risk factors should complement the findings from quantitative research. Having a systematic review when planning new qualitative research may help to avoid unintentional examination of questions that have already been extensively researched. Finally, the findings of this study on patients' perspectives could



1  
2  
3 better inform the development of future screening tools and interventions for  
4 avoiding MRPs. Additionally, our results may also increase researchers'  
5 knowledge of generic issues in this field, even when attempting to target a  
6 specific ethnic or cultural group.  
7  
8  
9

### 10 11 **Implication towards practices**

12 Patients' perspectives about medicine use and factors affecting their  
13 treatment regimen are often different from the medical viewpoint. Worldwide,  
14 people with CVD and/or DM widely perceive that their conditions are  
15 principally stress-related conditions and fear addiction or dependence on  
16 medicines, which leads to non-adherence to required treatments. These  
17 misconceptions and fears commonly cause people to reduce or stop  
18 treatment. If we are to be successful at minimising and preventing MRPs,  
19 incorporating patients' perspectives as well as considering medical records  
20 are paramount. An increased understanding between doctors and their  
21 patients must play a part in future strategies for reducing MRPs in patients  
22 with CVDs and/or DM.  
23  
24  
25  
26  
27  
28  
29  
30  
31  
32

### 33 **CONCLUSIONS**

34 This thematic synthesis of qualitative studies on patients' perspectives of the  
35 potential risk factors of MRPs shows that underlying factors that may lead to  
36 MRPs require further in-depth research. Factors influencing patients' success  
37 in treatment included patient-related (socioeconomic and lifestyle), medicine-  
38 related (fear of medicine, non-adherence, and polypharmacy), and condition-  
39 related factors (fear of condition and its complications). In summary, more  
40 qualitative research should be conducted on patients with CVDs and/or DM to  
41 understand and address issues related to the treatment regimens and  
42 subsequently reduce the cost of undesired hospital admissions resulting from  
43 MRPs.  
44  
45  
46  
47  
48  
49  
50  
51

### 52 **References**

- 53  
54  
55 1. Fernandez-Ilimos F, Faus M, Gastelurrutia M, et al. Evolution of the  
56 concept of drug-related problems : outcomes as the focus of the new  
57 paradigm Evolución del concepto de problemas relacionados con  
58  
59  
60



- 1  
2  
3 medicamentos: resultados como el centro del nuevo paradigma.  
4 Seguimiento Farmacoterapeutico 2005;**3**(4):167-88
- 5 2. Rozich J, Resar R. Medication Safety: One Organisation' s Approach.  
6 Journal of Clinical Outcomes Management 2001;**8**(10):27-34
  - 7 3. Ruths S, Viktil K, Blix H. Classification of drug-related problems. he Journal  
8 of the Norwegian Medical Association 2007;**127**:3073-76
  - 9 4. Wester K, Jönsson A, Spigset O, et al. Incidence of fatal adverse drug  
10 reactions: a population based study. British journal of clinical  
11 pharmacology 2008;**65**(4):573-79
  - 12 5. State of the Nation. 2012 ed. UK: Diabetes UK, 2012.
  - 13 6. Organisation WH. New data highlight increases in hypertension, diabetes  
14 incidence, 2012.
  - 15 7. Gordon K, Smith F, Dhillon S. Effective chronic disease management:  
16 Patients' perspectives on medication-related problems. Patient Educ  
17 Couns 2007;**65**(3):407-15
  - 18 8. Schainberg A, Ribeiro-Oliveira A, Ribeiro J. Is there a link between glucose  
19 levels and heart failure? An update. Arq Bras Endocrinol Metab  
20 2004;**54**(5):488-97
  - 21 9. Milicevic Z, Raz I, Beattie S, et al. Natural History of Cardiovascular  
22 Disease in Patients With Diabetes Role of hyperglycemia. Diabetes  
23 Care 2008;**31**(S2):S155-60
  - 24 10. Brenson R, Britten N. Patients' decisions about whether or not to take  
25 antihypertensive drugs: qualitative study. BMJ 2002;**325**:873-77
  - 26 11. Daly J, Denaro C, Emmerton L. Exploring beliefs about heart failure  
27 treatment in adherent and nonadherent patients: use of the repertory  
28 grid technique. Patient Prefer Adherence 2013;**7**:141-50 doi:  
29 10.3122/jabfm.2009.03.080114 Attitudes[published Online First:  
30 Epub Date]].
  - 31 12. Huri H, Wee H. Drug related problems in type 2 diabetes patients with  
32 hypertension: A cross-sectional retrospective study. BMC Endocrine  
33 Disorders 2013;**13**(1):2-14
  - 34 13. Zaman Huri H, Chai Ling L. Drug-Related Problems in Type 2 diabetes  
35 mellitus Patients with Dyslipidemia. BMC Public Health 2013;**13**:1192  
36 doi: 10.1186/1471-2458-13-1192[published Online First: Epub Date]].
  - 37 14. Claydon-Platt K, Manias E, Dunning T. Medication-related problems  
38 occurring in people with diabetes during an admission to an adult  
39 teaching hospital: a retrospective cohort study. Diabetes research and  
40 clinical practice 2012;**97**(2):223-30
  - 41 15. Haugbolle LS, Sorensen EW. Drug-related problems in patients with  
42 angina pectoris, type 2 diabetes and asthma--interviewing patients at  
43 home. Pharmacy world & science : PWS 2006;**28**(4):239-47 doi:  
44 10.1007/s11096-006-9023-9[published Online First: Epub Date]].
  - 45 16. Al Hamid A, Ghaleb M, Aljadhey H, et al. A systematic review of  
46 hospitalisation resulting from medicine related problems in adult  
47 patients. British journal of clinical pharmacology 2013 doi: doi:  
48 10.1111/bcp.12293[published Online First: Epub Date]].
  - 49 17. Dixon-Woods M, Bonas S, Booth A, et al. How can systematic reviews  
50 incorporate qualitative research? A critical perspective. Qualitative  
51 Research 2006;**6**(1):27-34
  - 52  
53  
54  
55  
56  
57  
58  
59  
60

18. Lucas P, Baird J, Arai L, et al. Worked examples of alternative methods for the synthesis of qualitative and quantitative research in systematic reviews. *BMC Med Res Methodol* 2007;**7**(1):4
19. Kruper A, Lingard L, Levinson W. Critically appraising qualitative research. *BMJ* 2008;**337**:a1035
20. Programme CAS. 10 questions to help you make sense of qualitative research. 2013. [http://media.wix.com/ugd/dded87\\_951541699e9edc71ce66c9bac4734c69.pdf](http://media.wix.com/ugd/dded87_951541699e9edc71ce66c9bac4734c69.pdf) (accessed 24-05-2014).
21. Cottrell WN, Denaro CP, Emmerton L. Exploring beliefs about heart failure treatment in adherent and nonadherent patients: use of the repertory grid technique. *Patient Prefer Adherence* 2013;**7**:141-50 doi: 10.2147/PPA.S40725[published Online First: Epub Date]].
22. Péres D, dos Santos M, Zanetti M, et al. DIFFICULTIES OF DIABETIC PATIENTS IN THE ILLNESS CONTROL: FEELINGS AND BEHAVIORS. *Rev Latino-am Enfermagem* 2007;**15**(6):1105-12
23. Kiawi E, Edwards R, Shu J, et al. KNOWLEDGE, ATTITUDES, AND BEHAVIOR RELATING TO DIABETES AND ITS MAIN RISK FACTORS AMONG URBAN RESIDENTS IN CAMEROON: A QUALITATIVE SURVEY. *Ethnicity and disease* 2006;**16**:503-09
24. Jolles EP, Padwal RS, Clark AM, et al. A Qualitative Study of Patient Perspectives about Hypertension. *ISRN Hypertension* 2013;**2013**:1-10 doi: 10.5402/2013/671691[published Online First: Epub Date]].
25. Vinter-Repalust N, Petriček G, Katić M. Obstacles which Patients with Type 2 Diabetes Meet while Adhering to the Therapeutic Regimen in Everyday Life: Qualitative Study. *Croatia Medical Journal* 2004;**45**(5):630-36
26. Smith S, O'Leary M, Bury G, et al. qualitative investigation of the views and health beliefs of patients with Type 2 diabetes following the introduction of a diabetes shared care service. *Diabet Med* 2003;**20**:853-7
27. Al-Qazaz HK, Hassali MA, Shafie AA, et al. Perception and knowledge of patients with type 2 diabetes in Malaysia about their disease and medication: a qualitative study. *Research in social & administrative pharmacy : RSAP* 2011;**7**(2):180-91 doi: 10.1016/j.sapharm.2010.04.005[published Online First: Epub Date]].
28. Mohd Ali S, Jusoff D. Barriers to Optimal Control of Type 2 Diabetes in Malaysian Malay Patients. *Global Journal of Health Science* 2009;**1**(2):106-18
29. Mshunqane N, Stewart AV, Rothberg AD. Type 2 diabetes management: Patient knowledge and health care team perceptions, South Africa. *African Journal of Primary Health Care & Family Medicine* 2012;**4**(1) doi: 10.4102/phcfm.v4i1.392[published Online First: Epub Date]].
30. Gascón J, Sánchez-Ortuño M, Llor B, et al. Why hypertensive patients do not comply with the treatment. *Family Practice* 2004;**21**(2):125-30
31. Lai WA, Lew-Ting CY, Chie WC. How diabetic patients think about and manage their illness in Taiwan. *Diabet Med* 2005;**22**(3):286-92 doi: 10.1111/j.1464-5491.2004.01406.x[published Online First: Epub Date]].
32. Brown KA, M Hubbard, M. Health beliefs of African–Caribbean people with type 2 diabetes:

- 1  
2  
3 a qualitative study. *British Journal of Clinical Practice* 2007;**57**:461-70
- 4 33. Choudhury SM, Brophy S, Williams R. Understanding and beliefs of  
5 diabetes in the UK Bangladeshi population. *Diabet Med*  
6 2009;**26**(6):636-40 doi: 10.1111/j.1464-5491.2009.02741.x[published  
7 Online First: Epub Date]].
- 8 34. Grace C, Begum R, Subhani S, et al. Prevention of type 2 diabetes in  
9 British Bangladeshis: qualitative study of community, religious, and  
10 professional perspectives. *BMJ* 2008;**337**:a1931 doi:  
11 10.1136/bmj.a1931[published Online First: Epub Date]].
- 12 35. Heymann A, Valinsky L, Inbar Z, et al. Perceptions of hypertension  
13 treatment among patients with and without diabetes. *BMC family*  
14 *practice* 2012;**13**:24-30 doi: 10.1186/1471-2296-13-24[published  
15 Online First: Epub Date]].
- 16 36. Lawton J, Ahmad N, Hanna L, et al. 'I can't do any serious exercise':  
17 barriers to physical activity amongst people of Pakistani and Indian  
18 origin with Type 2 diabetes. *Health education research* 2006;**21**(1):43-  
19 54 doi: 10.1093/her/cyh042[published Online First: Epub Date]].
- 20 37. Peel E, Parry O, Douglas M, et al. Diagnosis of type 2 diabetes: a  
21 qualitative analysis of patients' emotional reactions and views about  
22 information provision. *Patient Educ Couns* 2004;**53**(3):269-75 doi:  
23 10.1016/j.pec.2003.07.010[published Online First: Epub Date]].
- 24 38. Coronado G, Thompson B, Tejada S, et al. Attitudes and Beliefs Among  
25 Mexican Americans About Type 2 Diabetes. *Journal of Health Care for*  
26 *the Poor and Underserved* 2004;**15**(4):576-88
- 27 39. Hu J, Amirehsani K, Wallace DC, et al. Perceptions of barriers in  
28 managing diabetes: perspectives of Hispanic immigrant patients and  
29 family members. *The Diabetes educator* 2013;**39**(4):494-503 doi:  
30 10.1177/0145721713486200[published Online First: Epub Date]].
- 31 40. Rustveld L, Pavlik V, Jibaja-Weiss M, et al. Adherence to diabetes self-  
32 care behaviors  
33 in english- and spanish-speaking hispanic men. *Patient Preference and*  
34 *Adherence* 2009;**3**:123-30
- 35 41. Alhomoud F, Dhillon S, Aslanpour Z, et al. Medicine use and medicine-  
36 related problems experienced by ethnic minority patients in the United  
37 Kingdom: A review. *Int J Pharm Pract* 2013;**21**(5):277-78
- 38 42. Peeters E, Parry O, Douglas M, et al. Diagnosis of type 2 diabetes: a  
39 qualitative analysis of patients' emotional reactions and views about  
40 information provision. *Patient Educ Couns* 2004;**53**:269-75
- 41 43. Jin J, Sklar G, Oh V, et al. Factors affecting therapeutic compliance: A  
42 review from the patient's perspective. *Therapeutics and Clinical Risk*  
43 *Management* 2008;**4**(1):269-76
- 44 44. Vermeire E, Hearnshaw H, Van Royan P, et al. Patient adherence to  
45 treatment: three decades of research. A comprehensive review.  
46 *Journal of clinical pharmacy and therapeutics* 2001;**26**(5):331-42
- 47 45. Thomas J, Harden A. Methods for the thematic synthesis of qualitative  
48 research in systematic reviews. *BMC Med Res Methodol* 2008;**8**(1):45-  
49 52  
50  
51  
52  
53  
54  
55  
56  
57  
58  
59  
60

1  
2  
3 **Figure legend**  
4

5 Figure 1 Data extraction and study selection process.  
6  
7  
8  
9  
10  
11  
12  
13  
14  
15  
16  
17  
18  
19  
20  
21  
22  
23  
24  
25  
26  
27  
28  
29  
30  
31  
32  
33  
34  
35  
36  
37  
38  
39  
40  
41  
42  
43  
44  
45  
46  
47  
48  
49  
50  
51  
52  
53  
54  
55  
56  
57  
58  
59  
60

For peer review only

1  
2  
3  
4  
5  
6  
7  
8  
9  
10  
11  
12  
13  
14  
15  
16  
17  
18  
19  
20  
21  
22  
23  
24  
25  
26  
27  
28  
29  
30  
31  
32  
33  
34  
35  
36  
37  
38  
39  
40  
41  
42  
43  
44  
45  
46  
47  
48  
49  
50  
51  
52  
53  
54  
55  
56  
57  
58  
59  
60

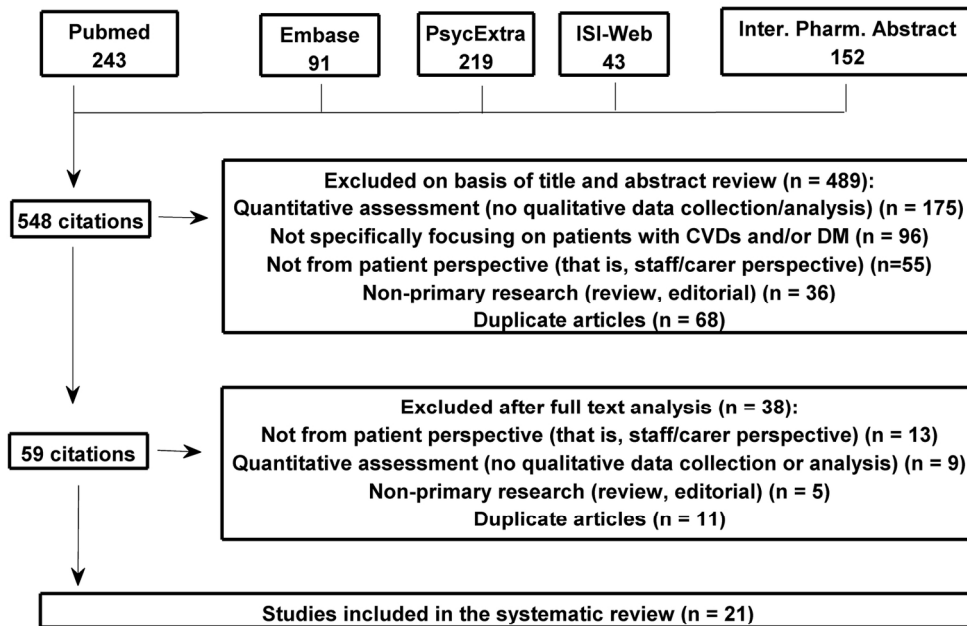

Figure 1  
152x114mm (300 x 300 DPI)

Review only
